# Supplementary material for: Bioactive norditerpenoids from Flickingeria fimbriata
Source: Royal Society of Chemistry journal article supplement (doi:10.1039/c4ra00835a), 2014-01-01
Supplement: c4ra00835a1.pdf [file c4ra00835a1.pdf]

# Electronic Supplementary Information

## Bioactive norditerpenoids from *Flickingeria fimbriata*

Jin-Long Chen,<sup>a</sup> Zhi-Min Zhao,<sup>a,b</sup> Xue Xue,<sup>a,b</sup> Gui-Hua Tang,<sup>a</sup> Long-Ping Zhu,<sup>b</sup> De-Po Yang,<sup>\*a,b</sup> and Lin Jiang<sup>\*a</sup>

<sup>a</sup> School of Pharmaceutical Sciences, Sun Yat-sen University, Guangzhou 510006, Guangdong, P. R. of China.

E-mail: Linderson\_jiang@163.com; Fax: +86-20-39943041

<sup>b</sup> Guangdong Technology Research Center for Advanced Chinese Medicine, Guangzhou 510006, Guangdong, P. R. of China.

E-mail: lssydp@mail.sysu.edu.cn; Fax: +86-20-39943043.

### Contents:

- S1** <sup>1</sup>H NMR Spectrum of **1** in CD<sub>3</sub>OD
- S2** <sup>13</sup>C NMR Spectrum of **1** in CD<sub>3</sub>OD
- S3** <sup>1</sup>H-<sup>1</sup>H COSY Spectrum of **1** in CD<sub>3</sub>OD
- S4** HSQC Spectrum of **1** in CD<sub>3</sub>OD
- S5** HMBC Spectrum of **1** in CD<sub>3</sub>OD
- S6** NOESY Spectrum of **1** in CD<sub>3</sub>OD
- S7** <sup>1</sup>H NMR Spectrum of **2** in CD<sub>3</sub>OD
- S8** <sup>13</sup>C NMR Spectrum of **2** in CD<sub>3</sub>OD
- S9** <sup>1</sup>H-<sup>1</sup>H COSY Spectrum of **2** in CD<sub>3</sub>OD
- S10** HSQC Spectrum of **2** in CD<sub>3</sub>OD
- S11** HMBC Spectrum of **2** in CD<sub>3</sub>OD
- S12** NOESY Spectrum of **2** in CD<sub>3</sub>OD
- S13** <sup>1</sup>H NMR Spectrum of **3** in CD<sub>3</sub>OD
- S14** <sup>13</sup>C NMR Spectrum of **3** in CD<sub>3</sub>OD
- S15** <sup>1</sup>H-<sup>1</sup>H COSY Spectrum of **3** in CD<sub>3</sub>OD

|            |                                                                                |
|------------|--------------------------------------------------------------------------------|
| <b>S16</b> | HSQC Spectrum of <b>3</b> in CD <sub>3</sub> OD                                |
| <b>S17</b> | HMBC Spectrum of <b>3</b> in CD <sub>3</sub> OD                                |
| <b>S18</b> | NOESY Spectrum of <b>3</b> in CD <sub>3</sub> OD                               |
| <b>S19</b> | <sup>1</sup> H NMR Spectrum of <b>4</b> in CD <sub>3</sub> OD                  |
| <b>S20</b> | <sup>13</sup> C NMR Spectrum of <b>4</b> in CD <sub>3</sub> OD                 |
| <b>S21</b> | <sup>1</sup> H- <sup>1</sup> H COSY Spectrum of <b>4</b> in CD <sub>3</sub> OD |
| <b>S22</b> | HSQC Spectrum of <b>4</b> in CD <sub>3</sub> OD                                |
| <b>S23</b> | HMBC Spectrum of <b>4</b> in CD <sub>3</sub> OD                                |
| <b>S24</b> | NOESY Spectrum of <b>4</b> in CD <sub>3</sub> OD                               |
| <b>S25</b> | <sup>1</sup> H NMR Spectrum of <b>5</b> in CDCl <sub>3</sub>                   |
| <b>S26</b> | <sup>13</sup> C NMR Spectrum of <b>5</b> in CDCl <sub>3</sub>                  |
| <b>S27</b> | HSQC Spectrum of <b>5</b> in CDCl <sub>3</sub>                                 |
| <b>S28</b> | HMBC Spectrum of <b>5</b> in CDCl <sub>3</sub>                                 |
| <b>S29</b> | NOESY Spectrum of <b>5</b> in CDCl <sub>3</sub>                                |
| <b>S30</b> | <sup>1</sup> H NMR Spectrum of <b>6</b> in CDCl <sub>3</sub>                   |
| <b>S31</b> | <sup>13</sup> C NMR Spectrum of <b>6</b> in CDCl <sub>3</sub>                  |
| <b>S32</b> | HSQC Spectrum of <b>6</b> in CDCl <sub>3</sub>                                 |
| <b>S33</b> | HMBC Spectrum of <b>6</b> in CDCl <sub>3</sub>                                 |
| <b>S34</b> | NOESY Spectrum of <b>6</b> in CDCl <sub>3</sub>                                |
| <b>S35</b> | <sup>1</sup> H NMR Spectrum of <b>7</b> in CDCl <sub>3</sub>                   |
| <b>S36</b> | <sup>13</sup> C NMR Spectrum of <b>7</b> in CDCl <sub>3</sub>                  |
| <b>S37</b> | <sup>1</sup> H- <sup>1</sup> H COSY Spectrum of <b>7</b> in CDCl <sub>3</sub>  |
| <b>S38</b> | HSQC Spectrum of <b>7</b> in CDCl <sub>3</sub>                                 |
| <b>S39</b> | HMBC Spectrum of <b>7</b> in CDCl <sub>3</sub>                                 |
| <b>S40</b> | NOESY Spectrum of <b>7</b> in CDCl <sub>3</sub>                                |
| <b>S41</b> | <sup>1</sup> H NMR Spectrum of <b>8</b> in CD <sub>3</sub> OD                  |

- S42**  $^{13}\text{C}$  NMR Spectrum of **8** in  $\text{CD}_3\text{OD}$
- S43**  $^1\text{H}$ - $^1\text{H}$  COSY Spectrum of **8** in  $\text{CD}_3\text{OD}$
- S44** HSQC Spectrum of **8** in  $\text{CD}_3\text{OD}$
- S45** HMBC Spectrum of **8** in  $\text{CD}_3\text{OD}$
- S46** NOESY Spectrum of **8** in  $\text{CD}_3\text{OD}$
- S47**  $^1\text{H}$  NMR Spectrum of **9** in  $\text{CD}_3\text{OD}$
- S48**  $^{13}\text{C}$  NMR Spectrum of **9** in  $\text{CD}_3\text{OD}$
- S49**  $^1\text{H}$ - $^1\text{H}$  COSY Spectrum of **9** in  $\text{CD}_3\text{OD}$
- S50** HSQC Spectrum of **9** in  $\text{CD}_3\text{OD}$
- S51** HMBC Spectrum of **9** in  $\text{CD}_3\text{OD}$
- S52** NOESY Spectrum of **9** in  $\text{CD}_3\text{OD}$
- S53**  $^1\text{H}$  NMR Spectrum of **10** in  $\text{CD}_3\text{OD}$
- S54**  $^{13}\text{C}$  NMR Spectrum of **10** in  $\text{CD}_3\text{OD}$
- S55**  $^1\text{H}$ - $^1\text{H}$  COSY Spectrum of **10** in  $\text{CD}_3\text{OD}$
- S56** HSQC Spectrum of **10** in  $\text{CD}_3\text{OD}$
- S57** HMBC Spectrum of **10** in  $\text{CD}_3\text{OD}$
- S58** NOESY Spectrum of **10** in  $\text{CD}_3\text{OD}$
- S59**  $^1\text{H}$  NMR Spectrum of **11** in  $\text{CD}_3\text{OD}$
- S60**  $^{13}\text{C}$  NMR Spectrum of **11** in  $\text{CD}_3\text{OD}$
- S61**  $^1\text{H}$ - $^1\text{H}$  COSY Spectrum of **11** in  $\text{CD}_3\text{OD}$
- S62** HSQC Spectrum of **11** in  $\text{CD}_3\text{OD}$
- S63** HMBC Spectrum of **11** in  $\text{CD}_3\text{OD}$
- S64** NOESY Spectrum of **11** in  $\text{CD}_3\text{OD}$
- S65**  $^1\text{H}$  NMR Spectrum of **12** in  $\text{CD}_3\text{OD}$
- S66**  $^{13}\text{C}$  NMR Spectrum of **12** in  $\text{CD}_3\text{OD}$
- S67**  $^1\text{H}$  NMR Spectrum of **2a** in  $\text{CDCl}_3$

- S68**  $^{13}\text{C}$  NMR Spectrum of **2a** in  $\text{CDCl}_3$
- S69**  $^1\text{H}$ - $^1\text{H}$  COSY Spectrum of **2a** in  $\text{CDCl}_3$
- S70** HSQC Spectrum of **2a** in  $\text{CDCl}_3$
- S71** HMBC Spectrum of **2a** in  $\text{CDCl}_3$
- S72** NOESY Spectrum of **2a** in  $\text{CDCl}_3$
- S73**  $^1\text{H}$  NMR Spectrum of **2b** in  $\text{CDCl}_3$
- S74**  $^{13}\text{C}$  NMR Spectrum of **2b** in  $\text{CDCl}_3$
- S75** HSQC Spectrum of **2b** in  $\text{CDCl}_3$
- S76** HMBC Spectrum of **2b** in  $\text{CDCl}_3$
- S77**  $^1\text{H}$  NMR Spectrum of **1a** in  $\text{CDCl}_3$
- S78**  $^{13}\text{C}$  NMR Spectrum of **1a** in  $\text{CDCl}_3$
- S79** Selected  $^1\text{H}$ - $^1\text{H}$  COSY, HMBC, and NOE correlations of **2-6**.
- S80** Enlarged X-ray structure of **1**
- S81** Enlarged X-ray structure of **2a**
- S82** The transformation of **2** to **2a**.
- S83** CD curves of **1**, **7-10** and **12**.
- S84** CD curves of **2-4** and **11**.
- S85** X-ray crystallographic data for **1**.
- S86** X-ray crystallographic data for **2a**.

**S1**  $^1\text{H}$  NMR Spectrum of **1** in  $\text{CD}_3\text{OD}$

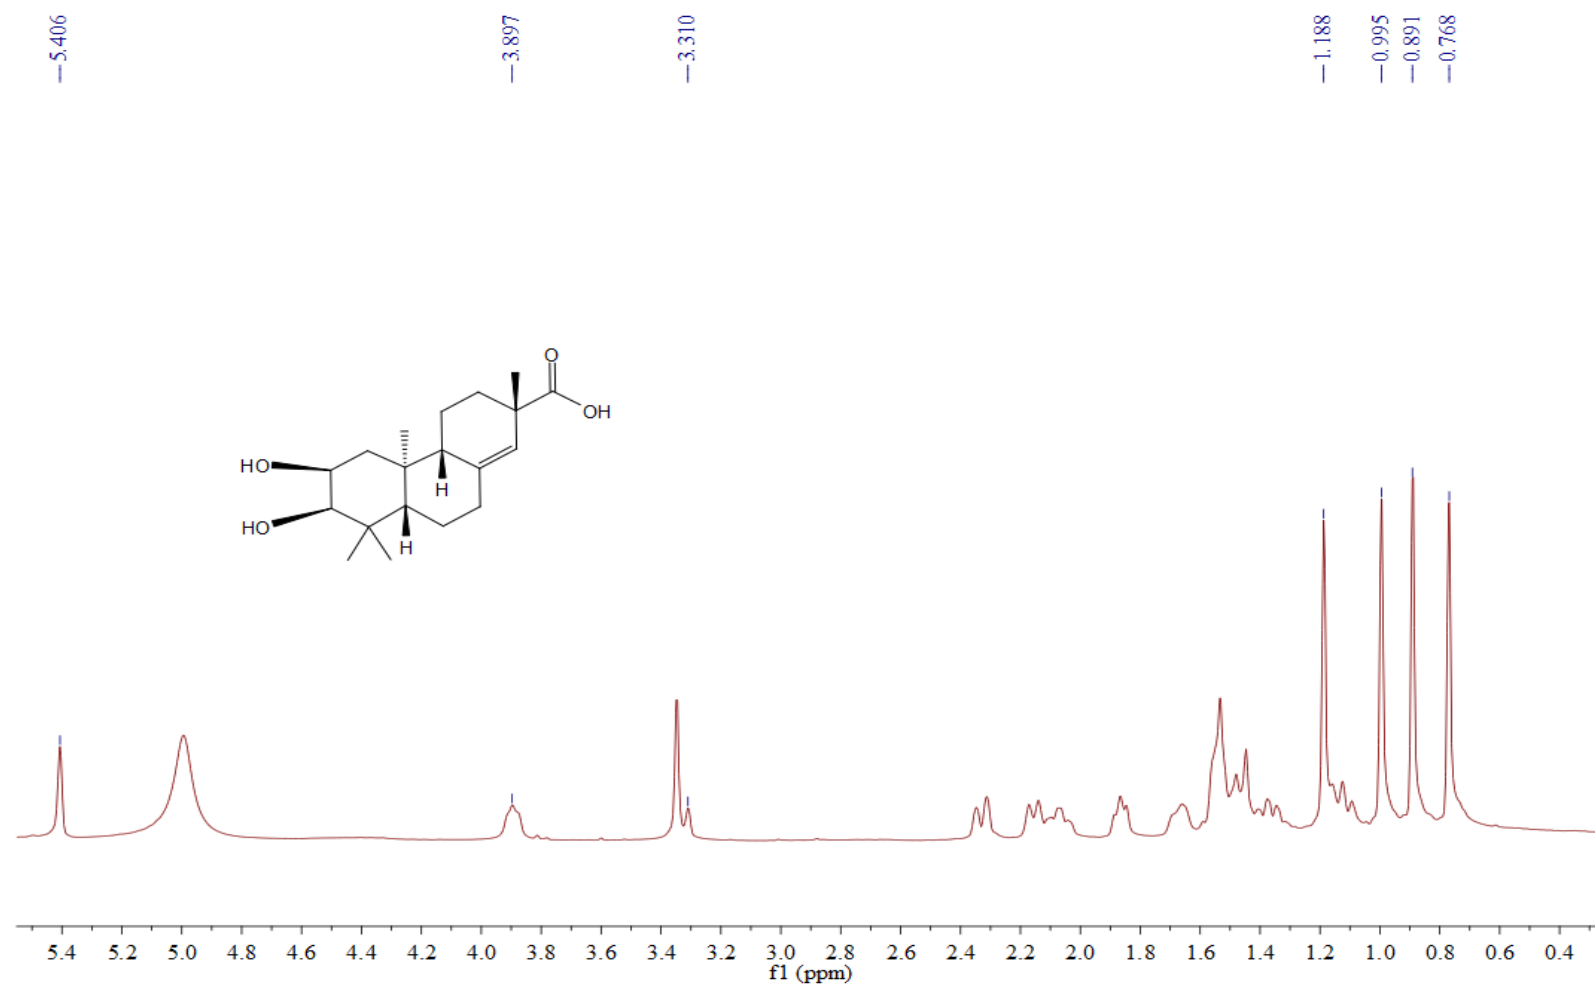

**S2**  $^{13}\text{C}$  NMR Spectrum of **1** in  $\text{CD}_3\text{OD}$

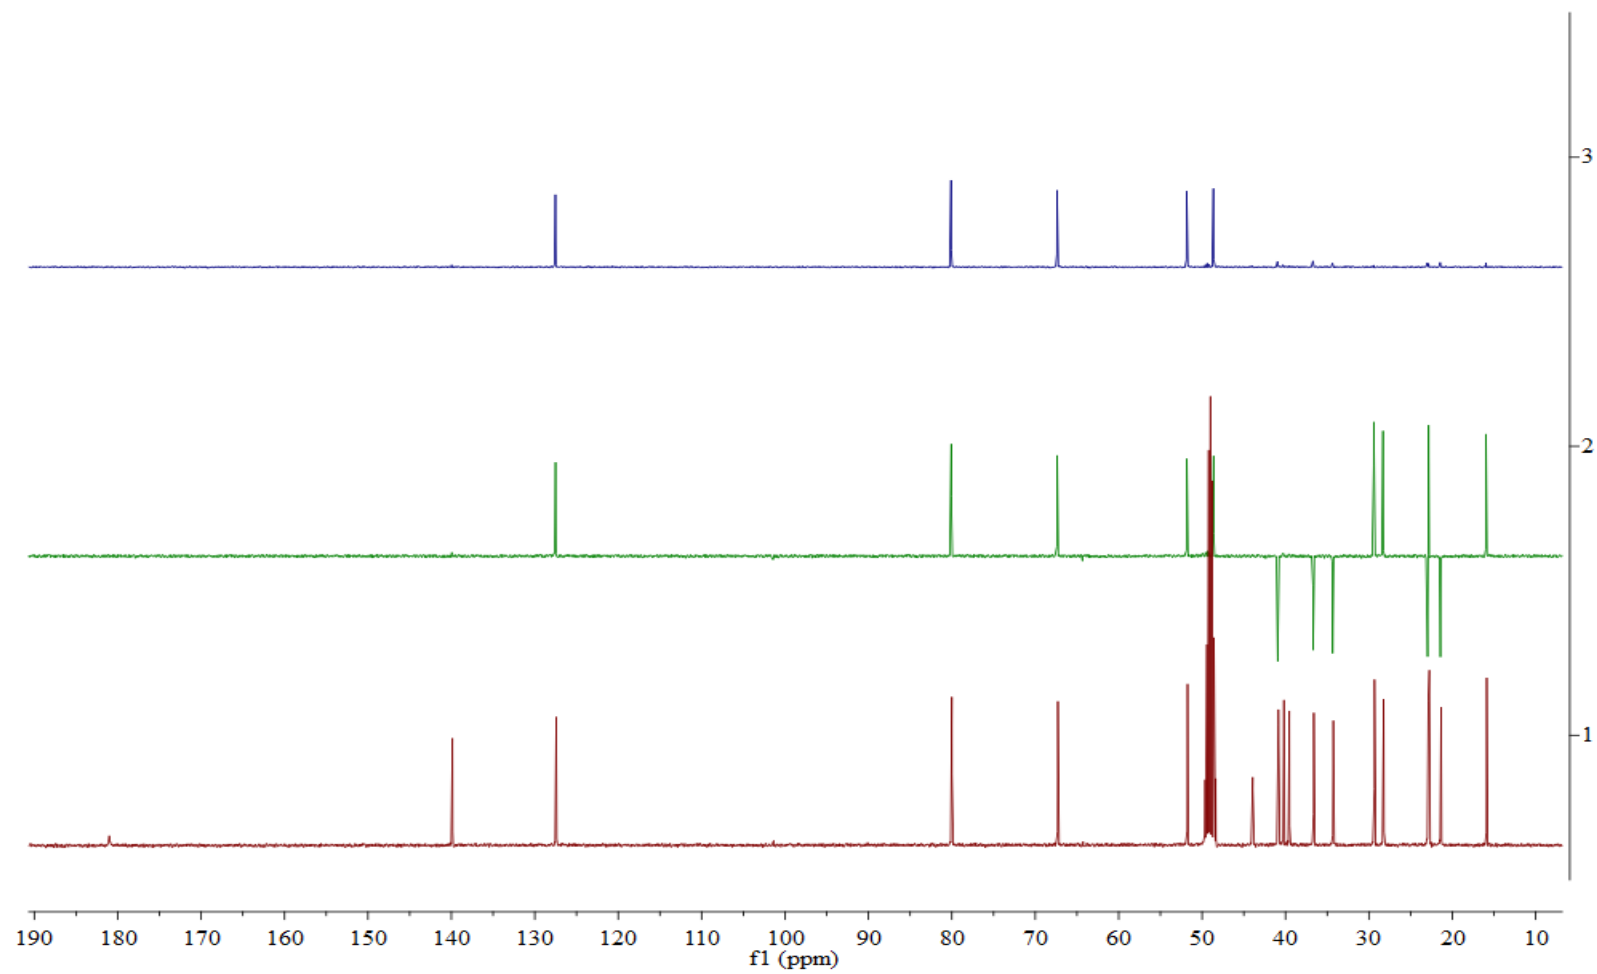

S3  $^1\text{H}$ - $^1\text{H}$  COSY Spectrum of **1** in  $\text{CD}_3\text{OD}$

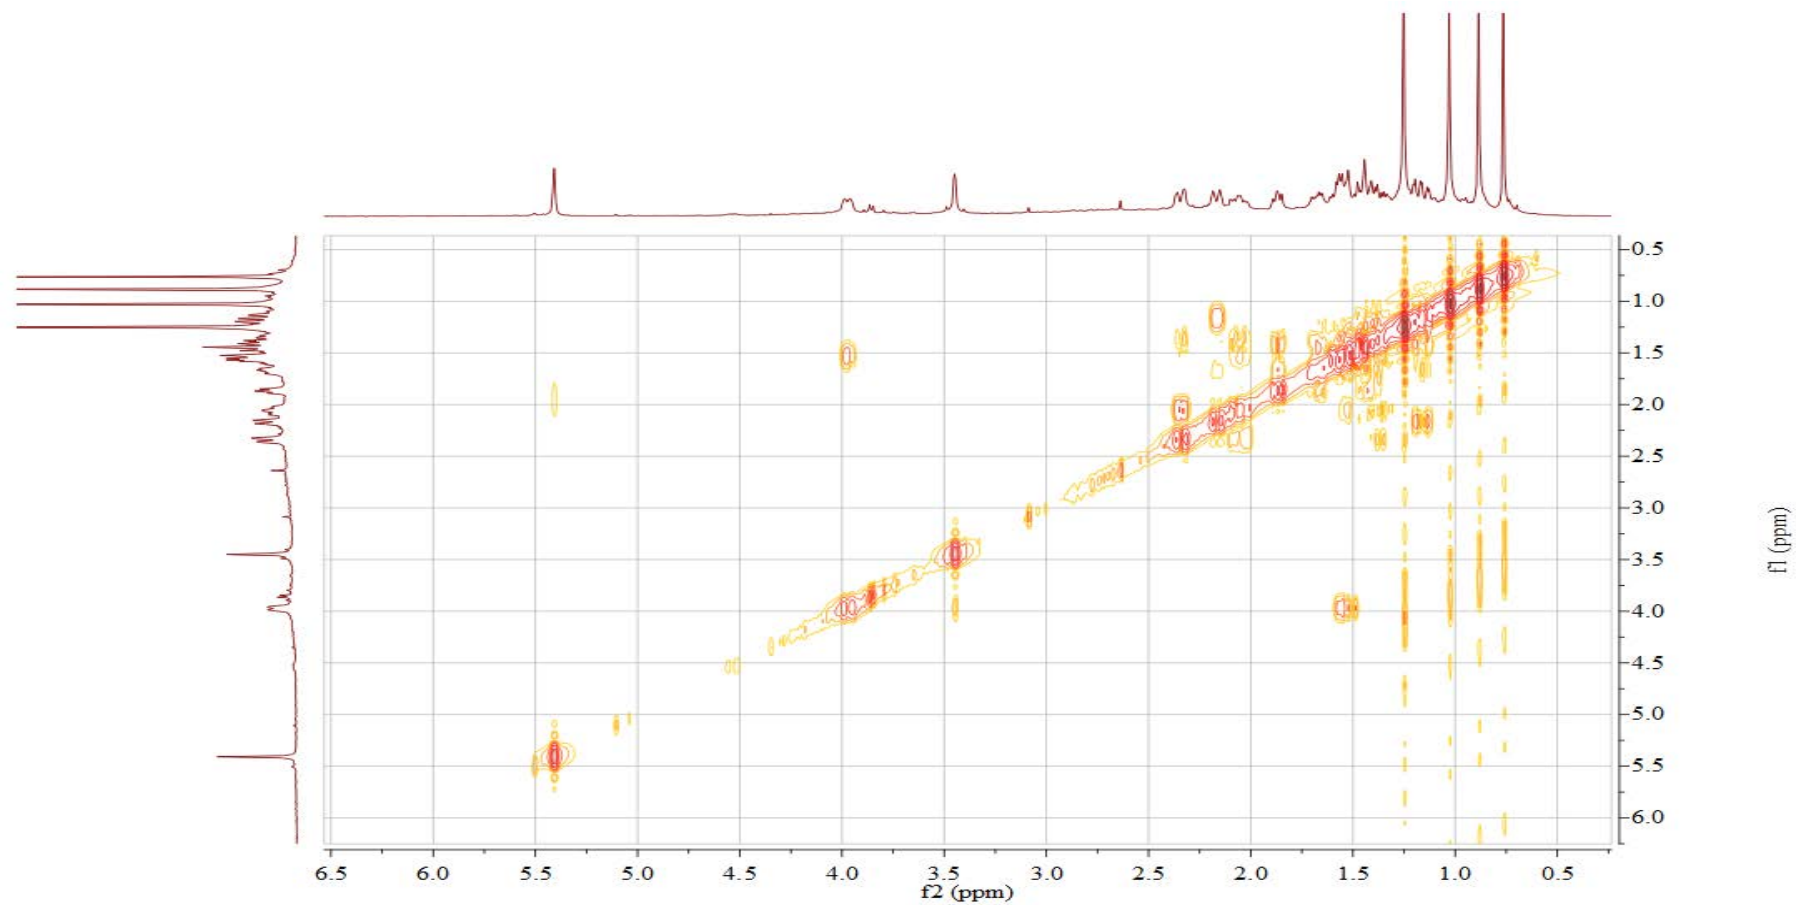

S4 HSQC Spectrum of **1** in CD<sub>3</sub>OD

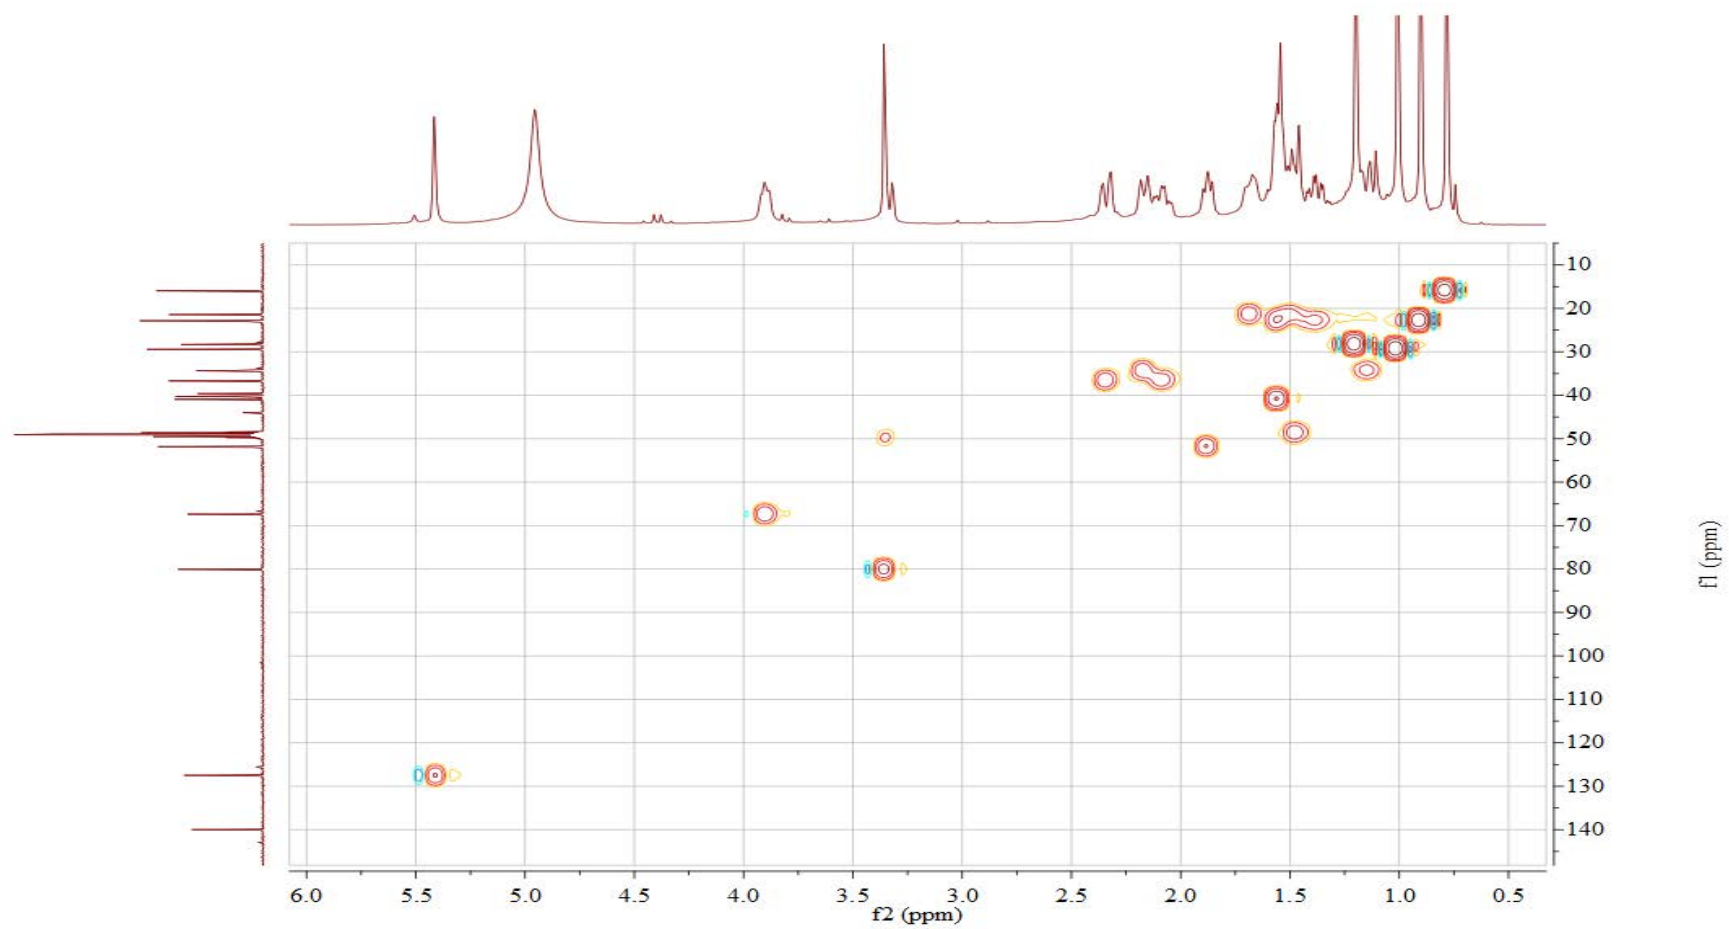



S5 HMBC Spectrum of **1** in CD<sub>3</sub>OD

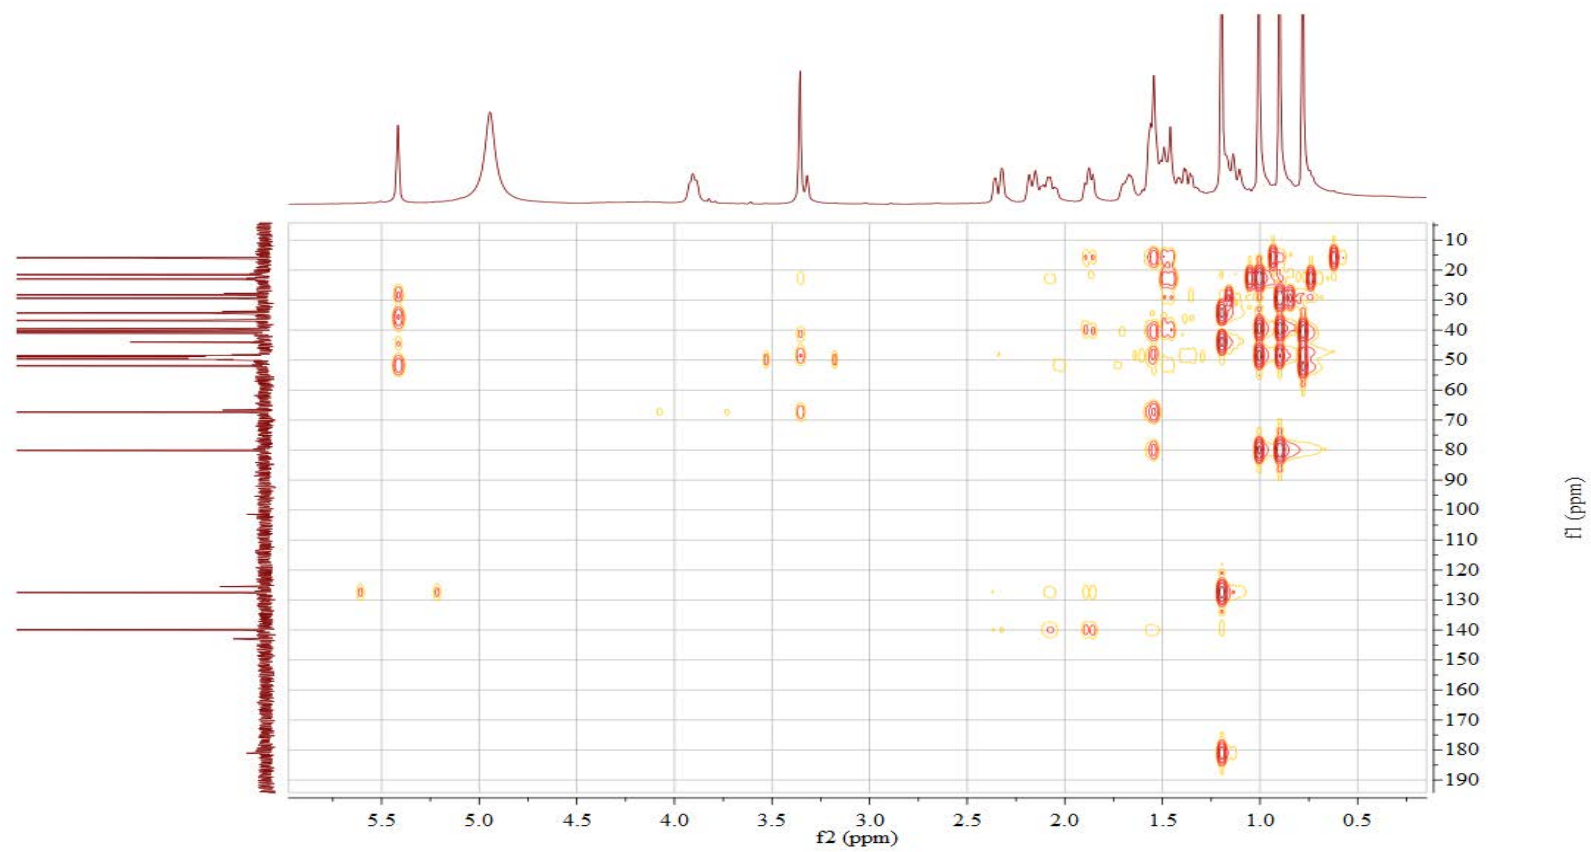

S6 NOESY Spectrum of **1** in CD<sub>3</sub>OD

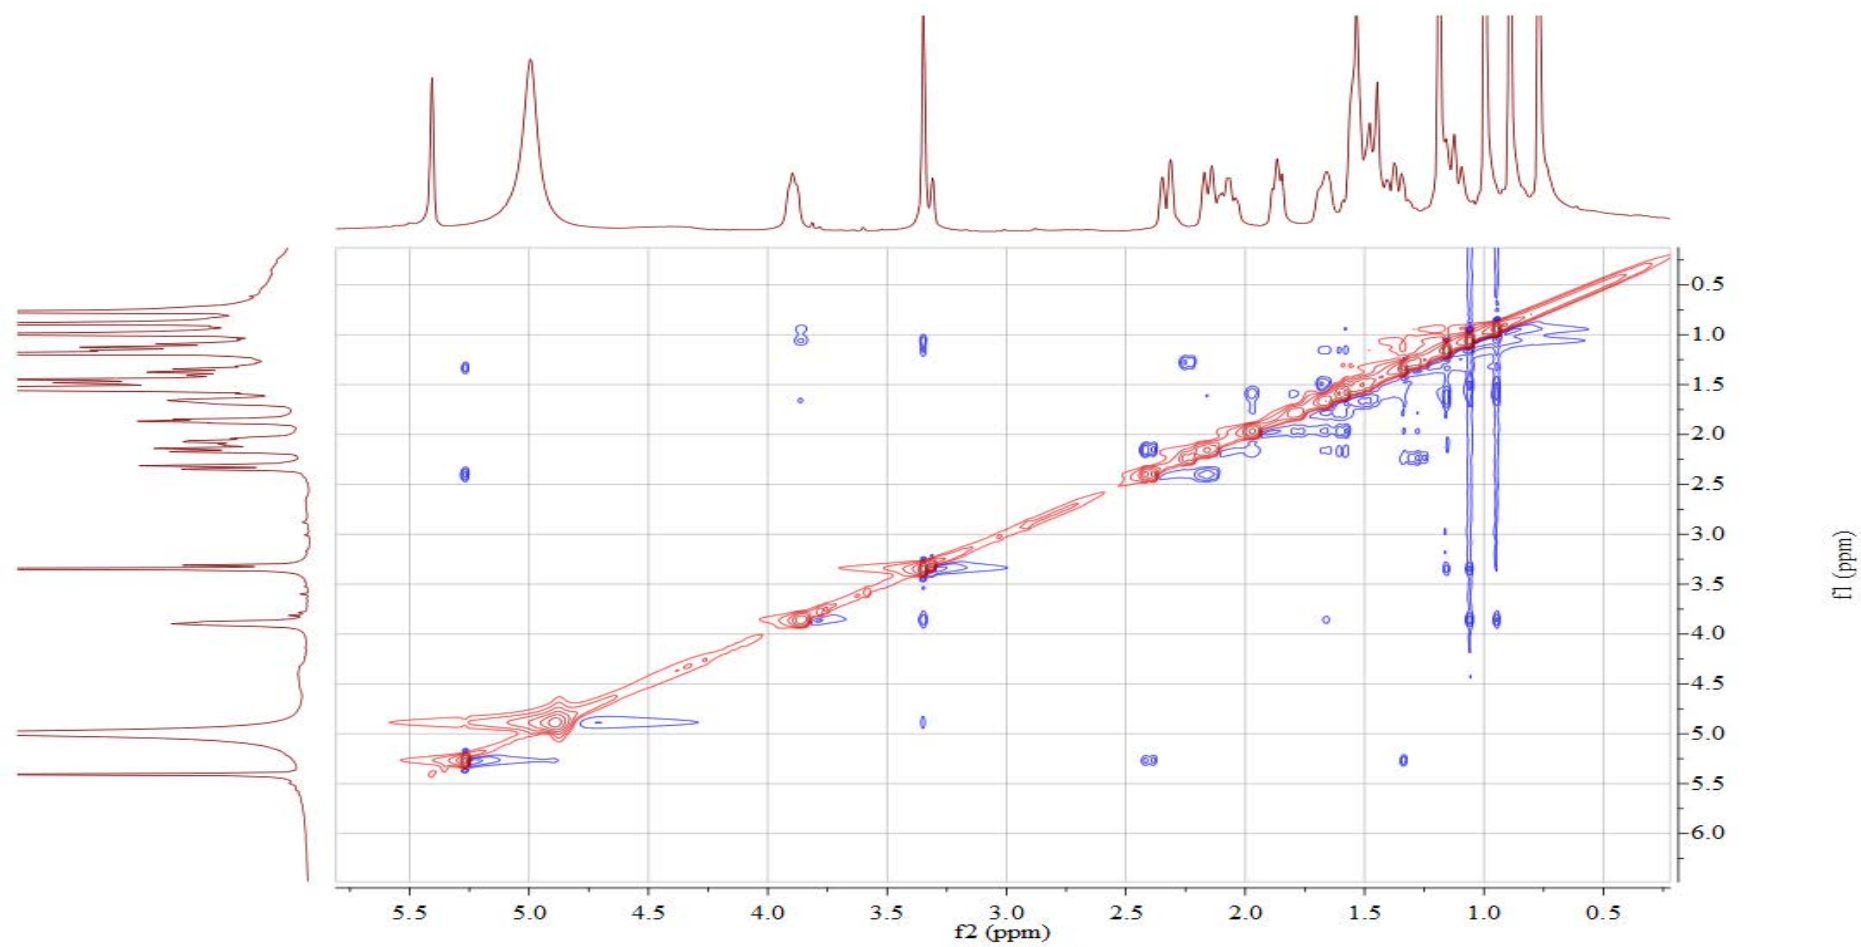

S7  $^1\text{H}$  NMR Spectrum of **2** in  $\text{CD}_3\text{OD}$

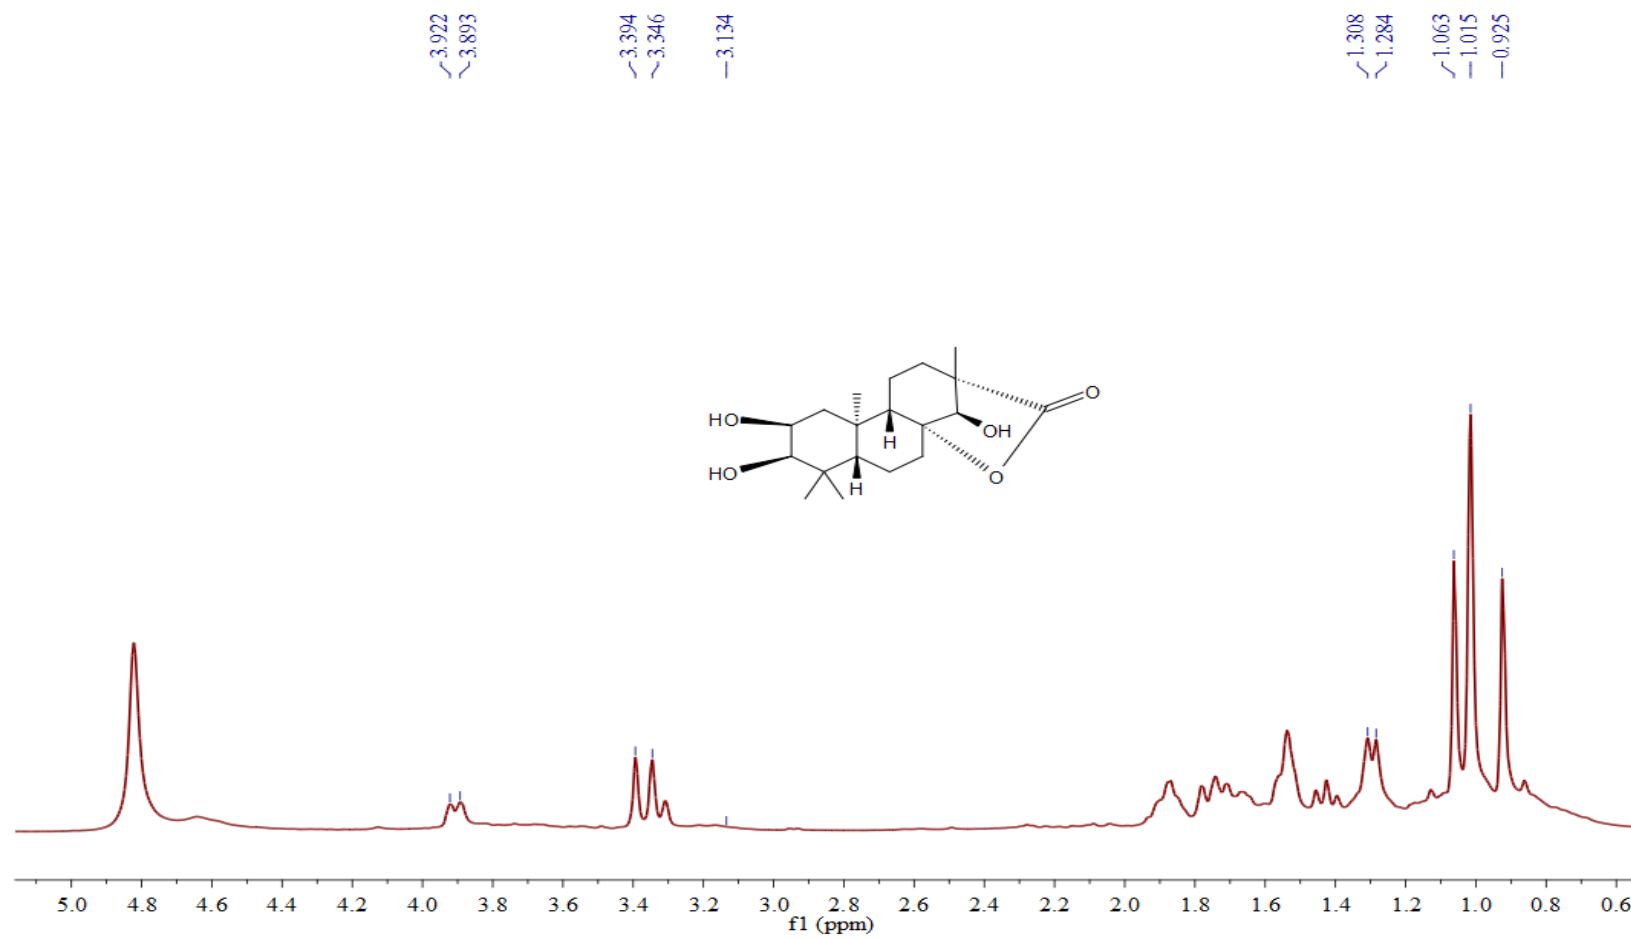

S8  $^{13}\text{C}$  NMR Spectrum of **2** in  $\text{CD}_3\text{OD}$

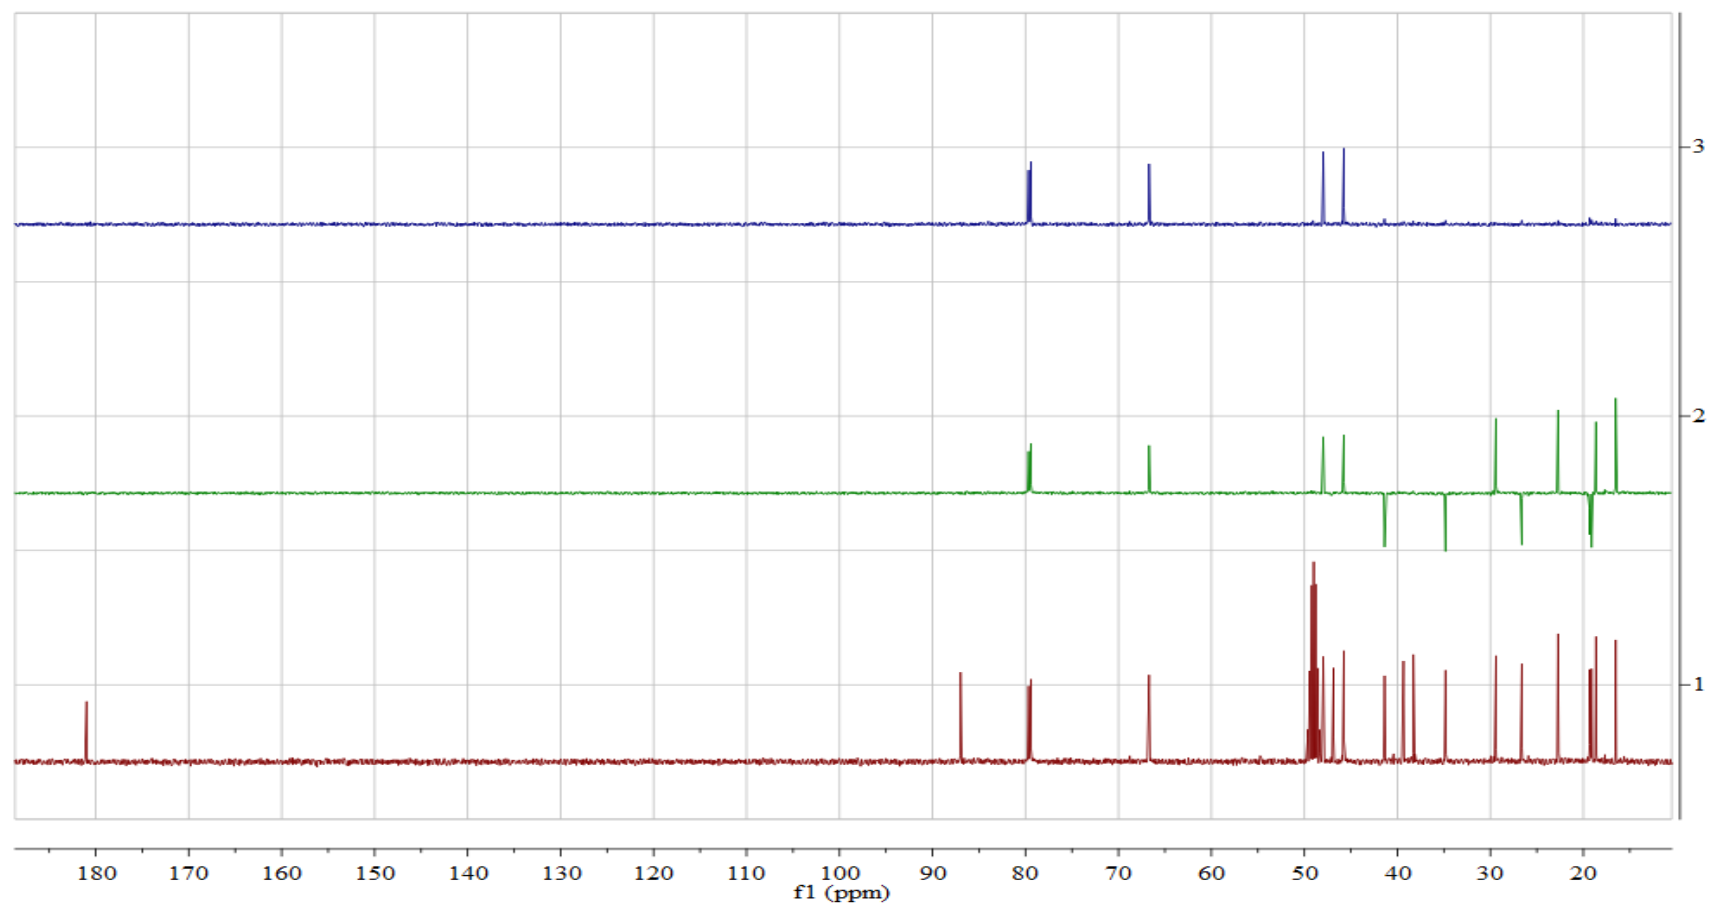

S9  $^1\text{H}$ - $^1\text{H}$  COSY Spectrum of **2** in  $\text{CD}_3\text{OD}$

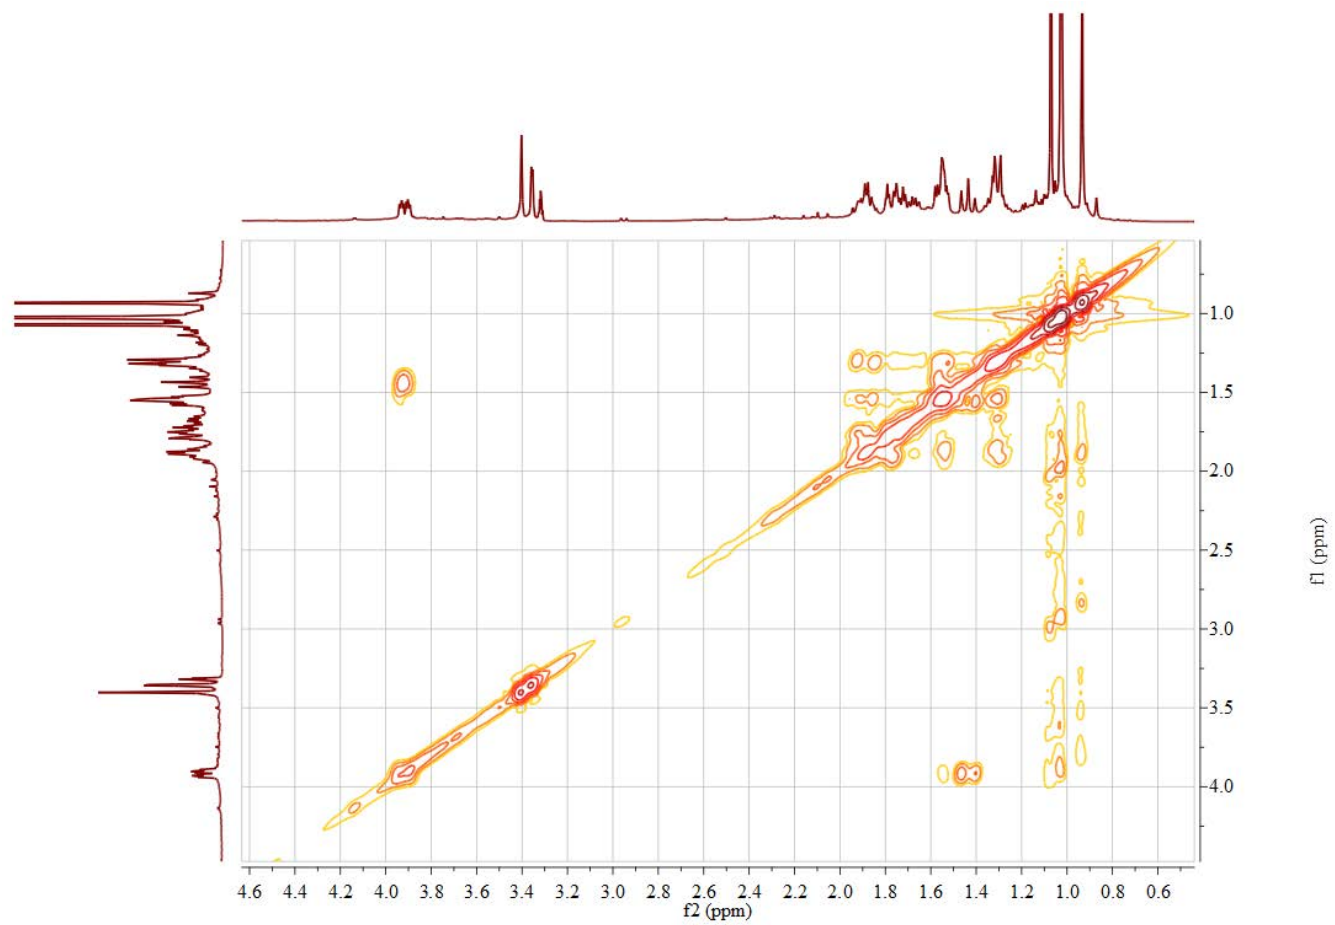

S10 HSQC Spectrum of **2** in CD<sub>3</sub>OD

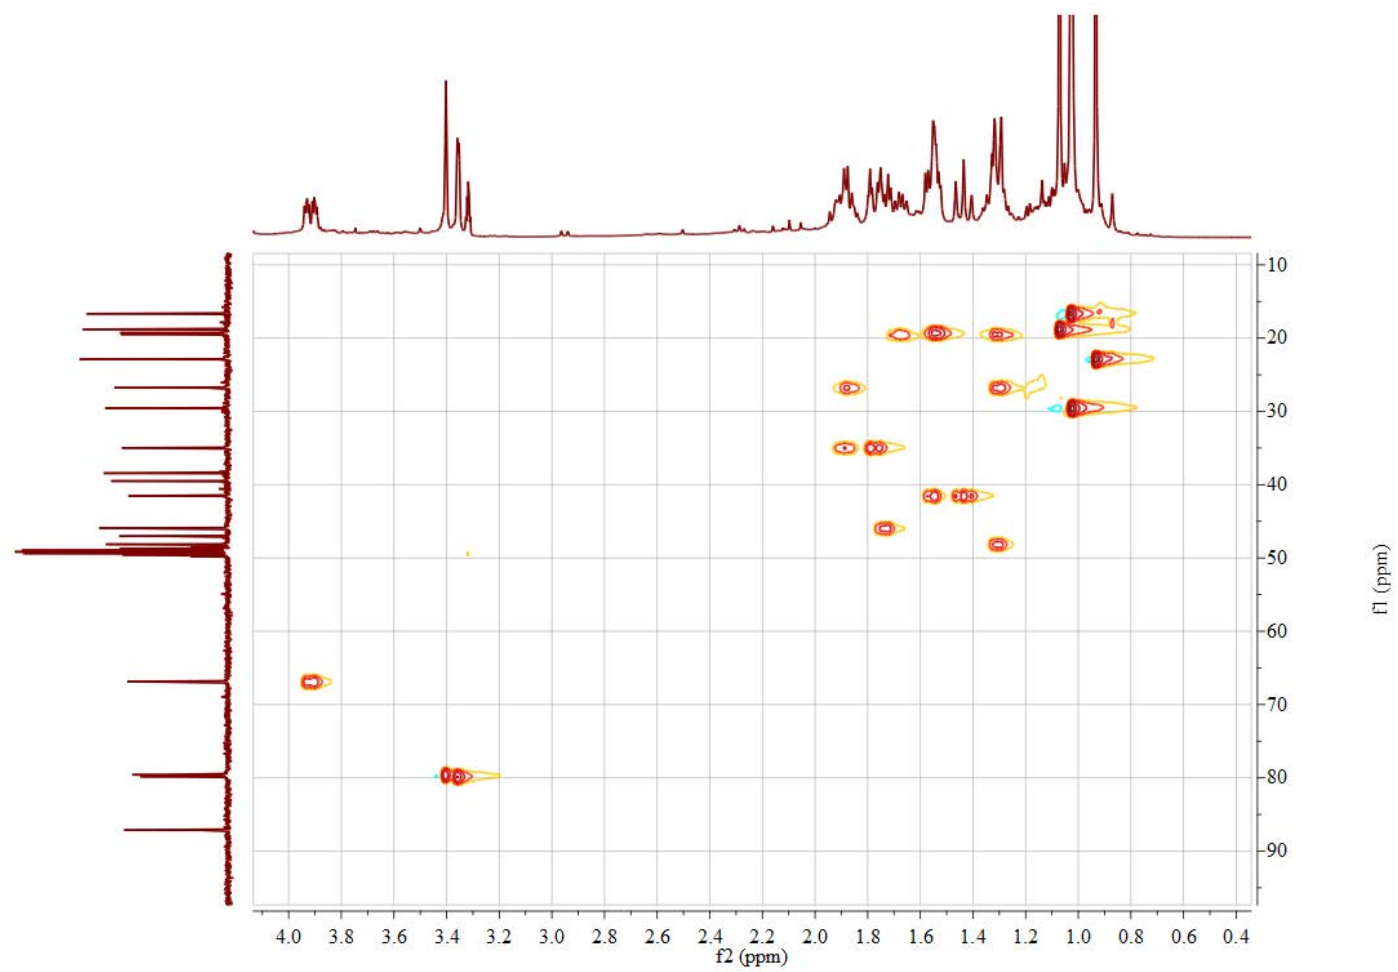

S11 HMBC Spectrum of **2** in CD<sub>3</sub>OD

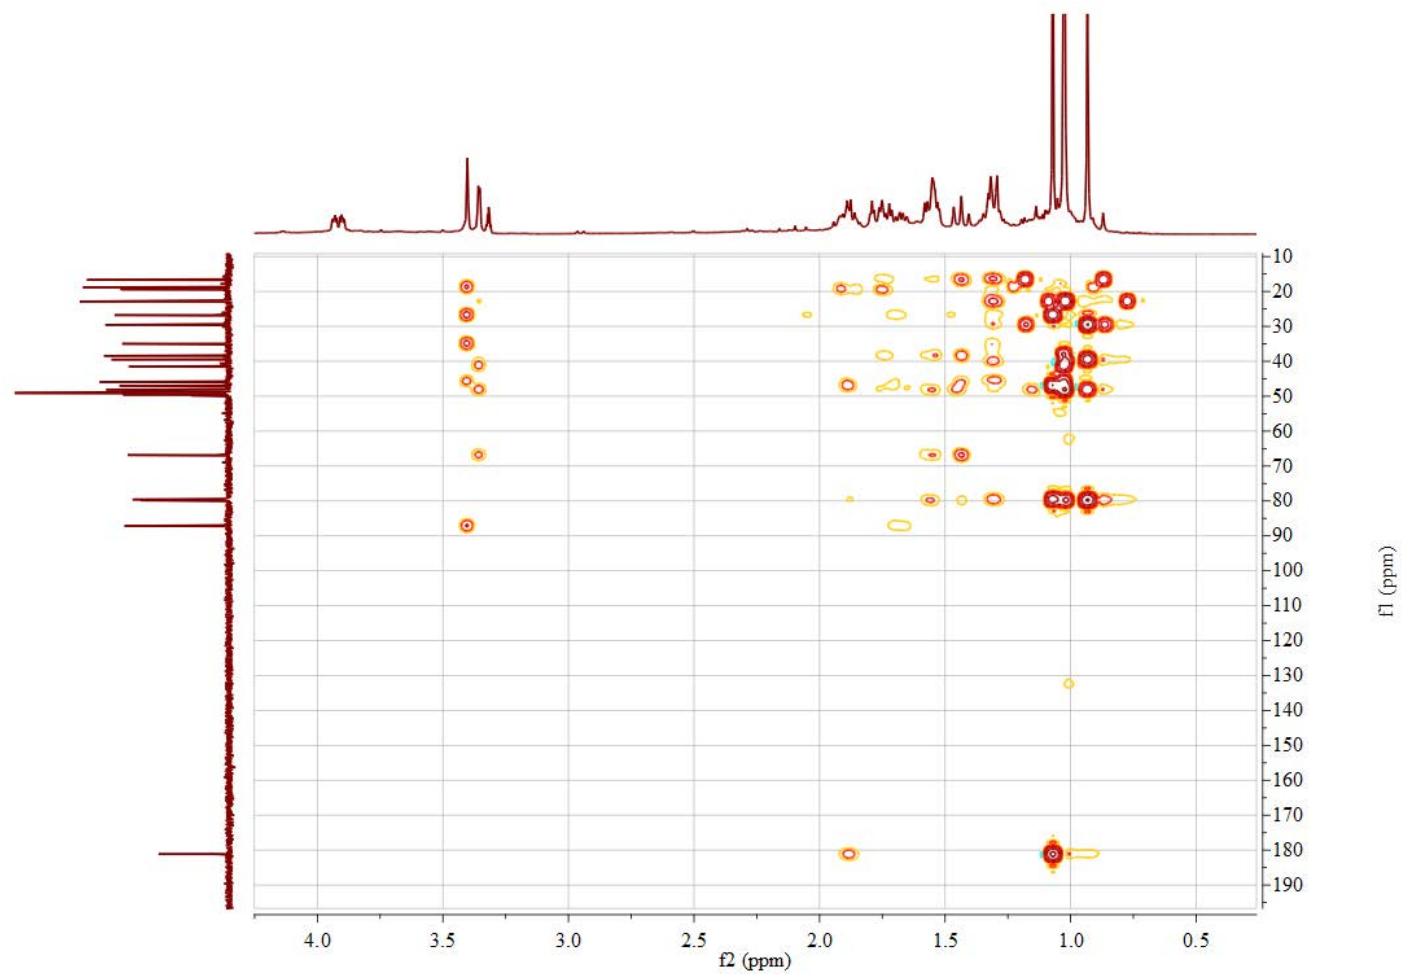

**S12** NOESY Spectrum of **2** in CD<sub>3</sub>OD

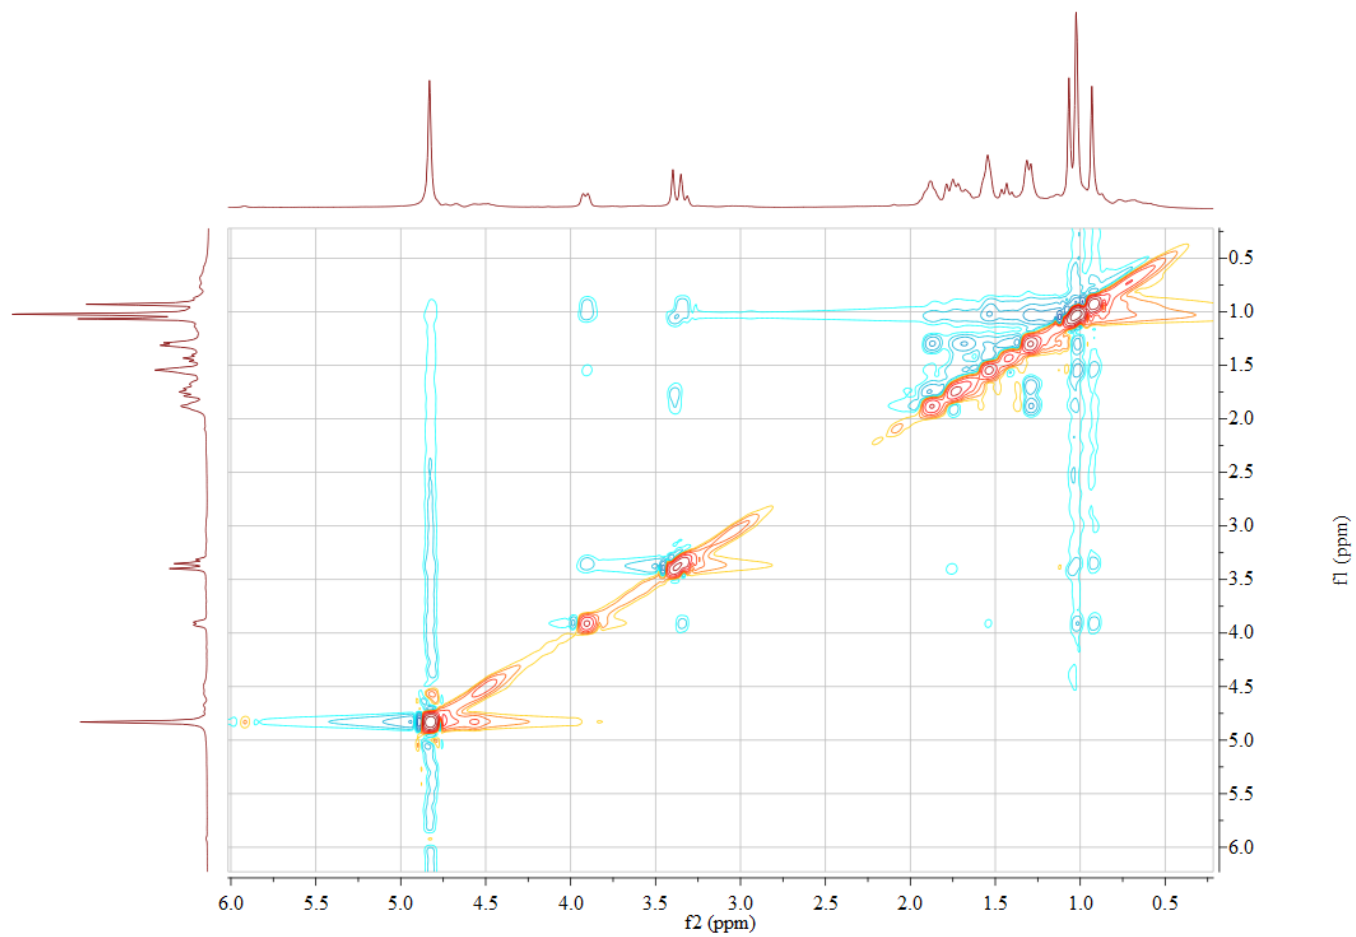



**S13**  $^1\text{H}$  NMR Spectrum of **3** in  $\text{CD}_3\text{OD}$

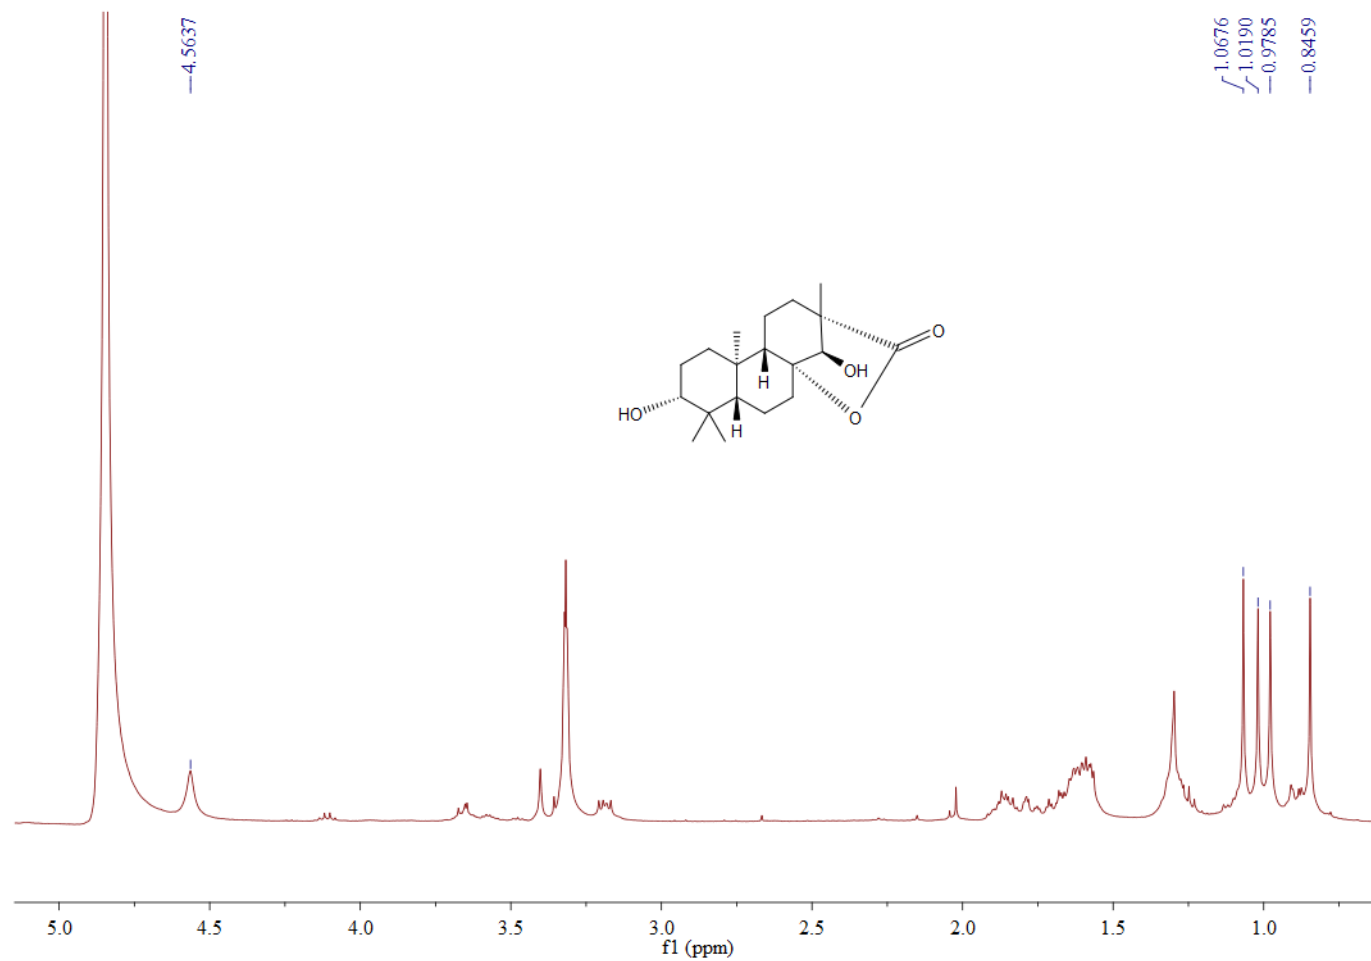

**S14**  $^{13}\text{C}$  NMR Spectrum of **3** in  $\text{CD}_3\text{OD}$

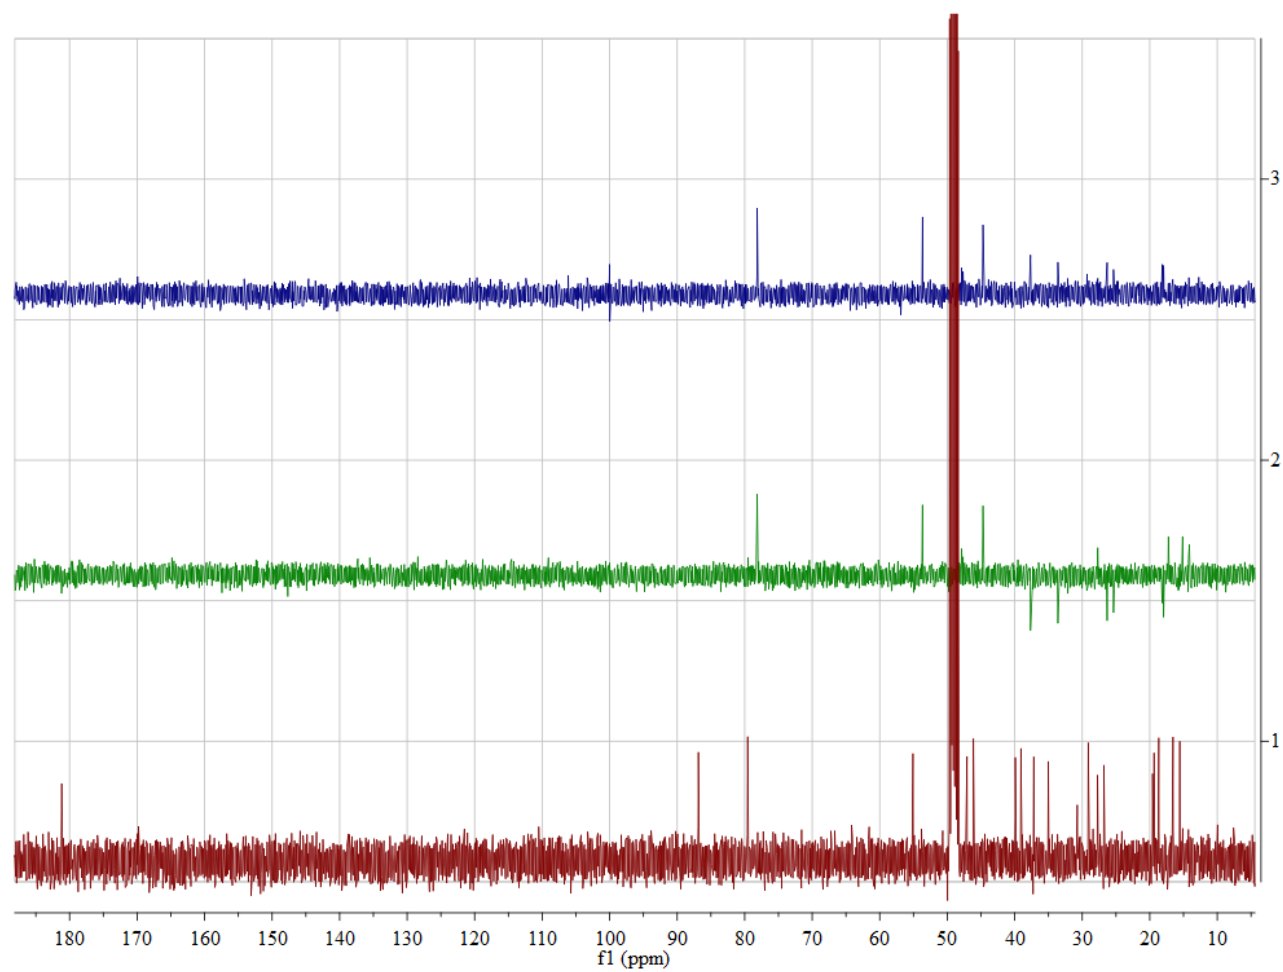

S15  $^1\text{H}$ - $^1\text{H}$  COSY Spectrum of **3** in  $\text{CD}_3\text{OD}$

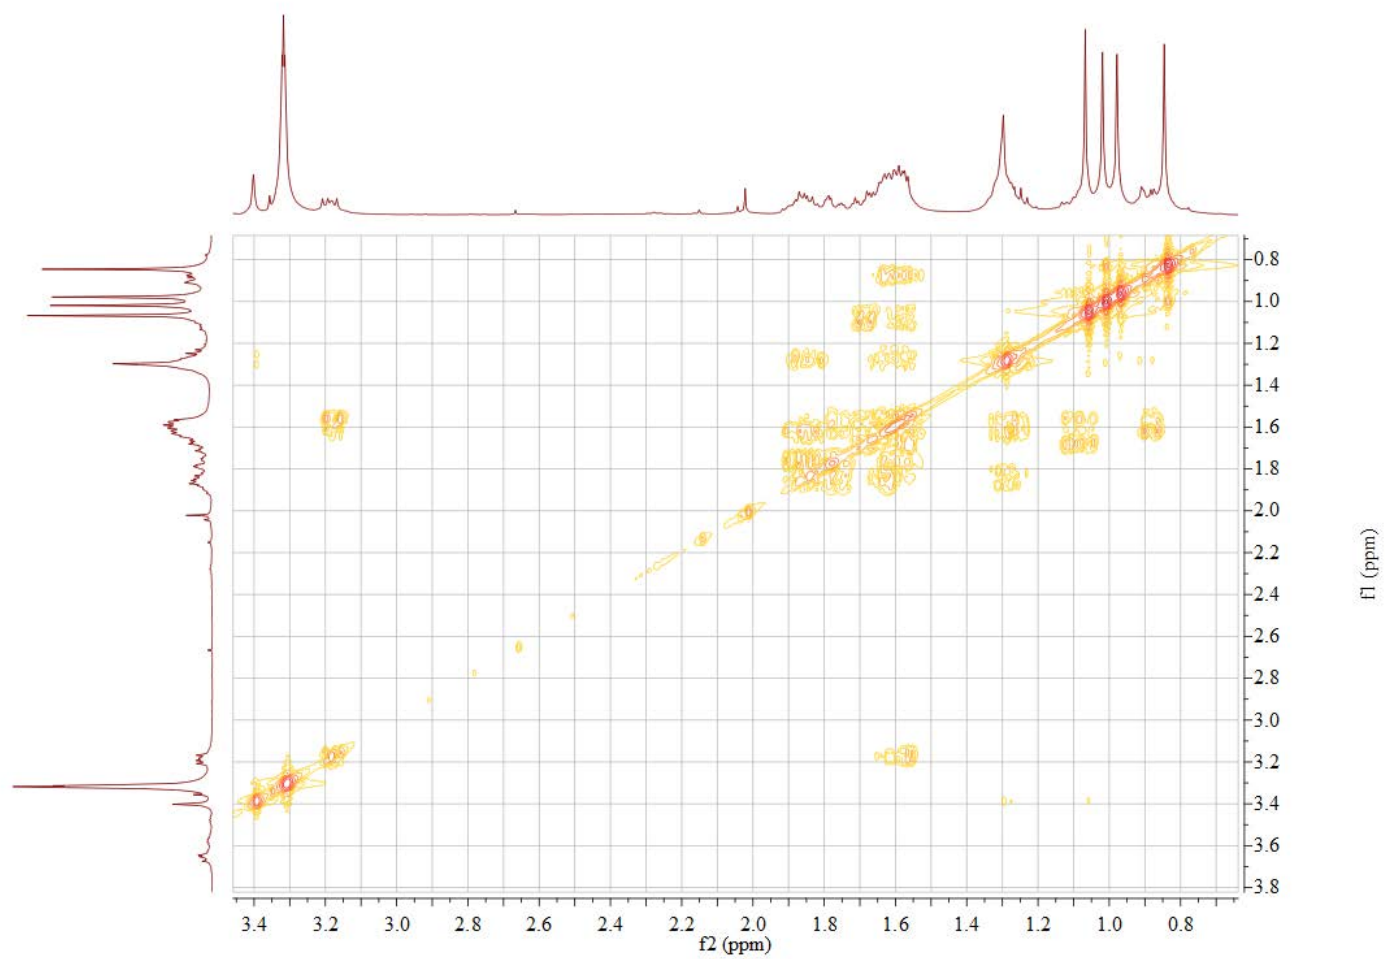

**S16** HSQC Spectrum of **3** in CD<sub>3</sub>OD

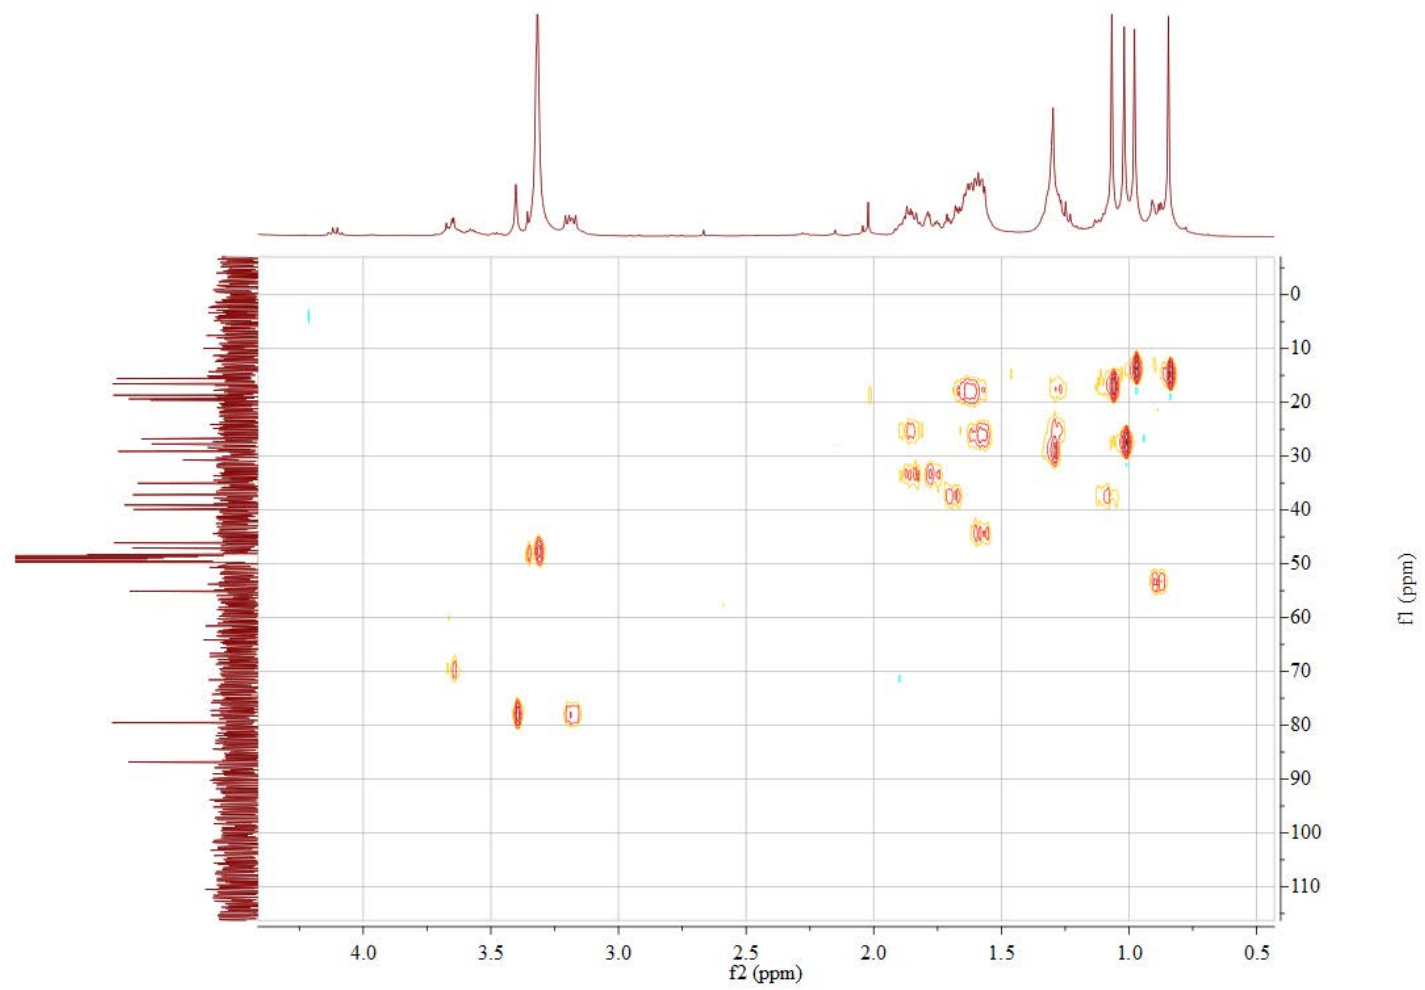

S17 HMBC Spectrum of **3** in CD<sub>3</sub>OD

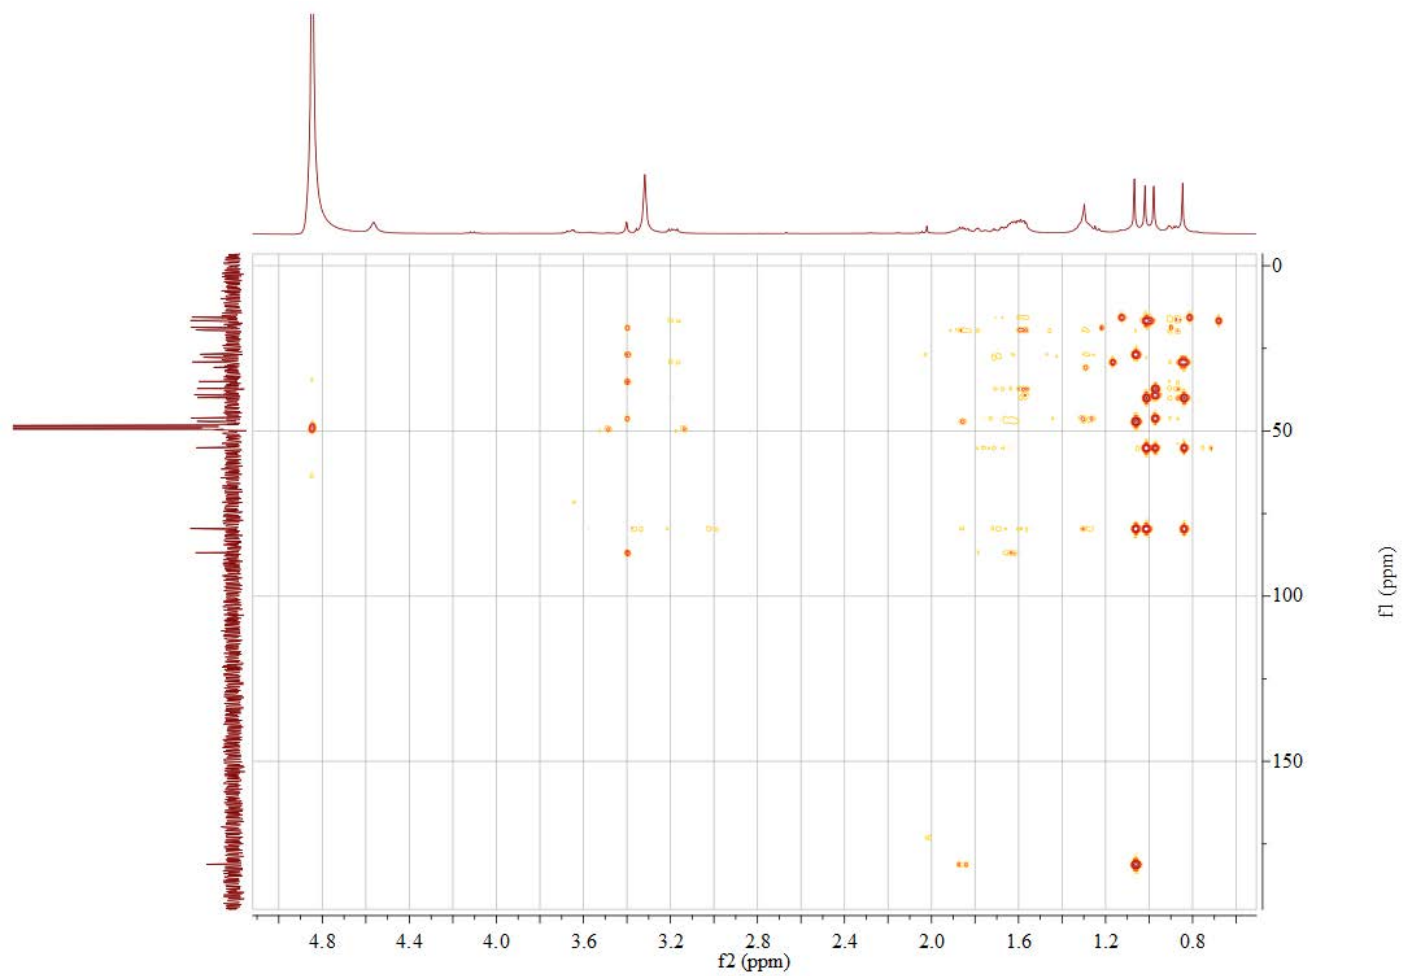

**S18** NOESY Spectrum of **3** in CD<sub>3</sub>OD

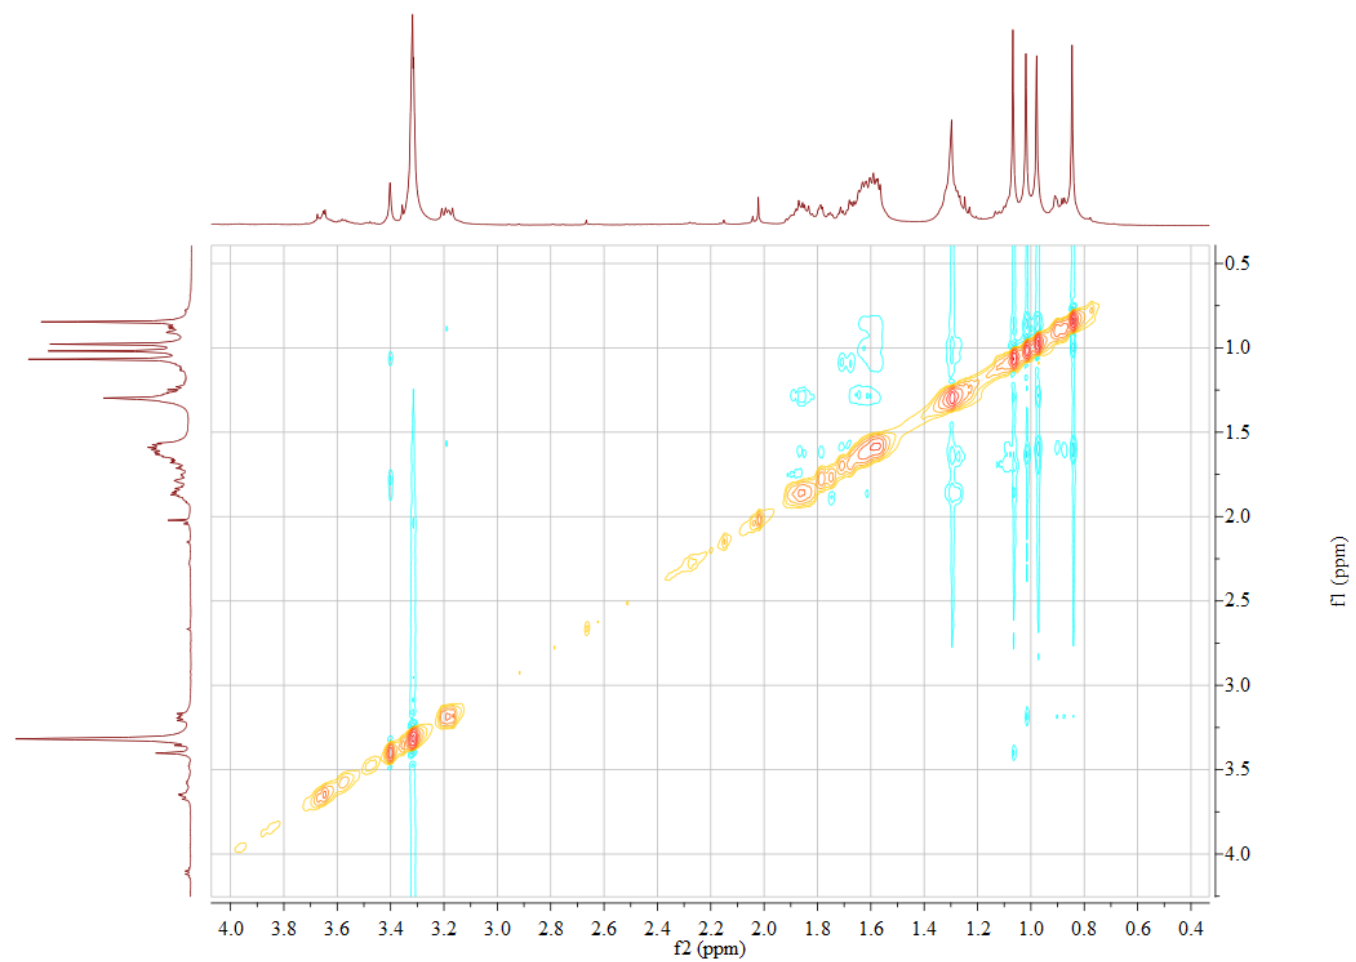

**S19**  $^1\text{H}$  NMR Spectrum of **4** in  $\text{CD}_3\text{OD}$

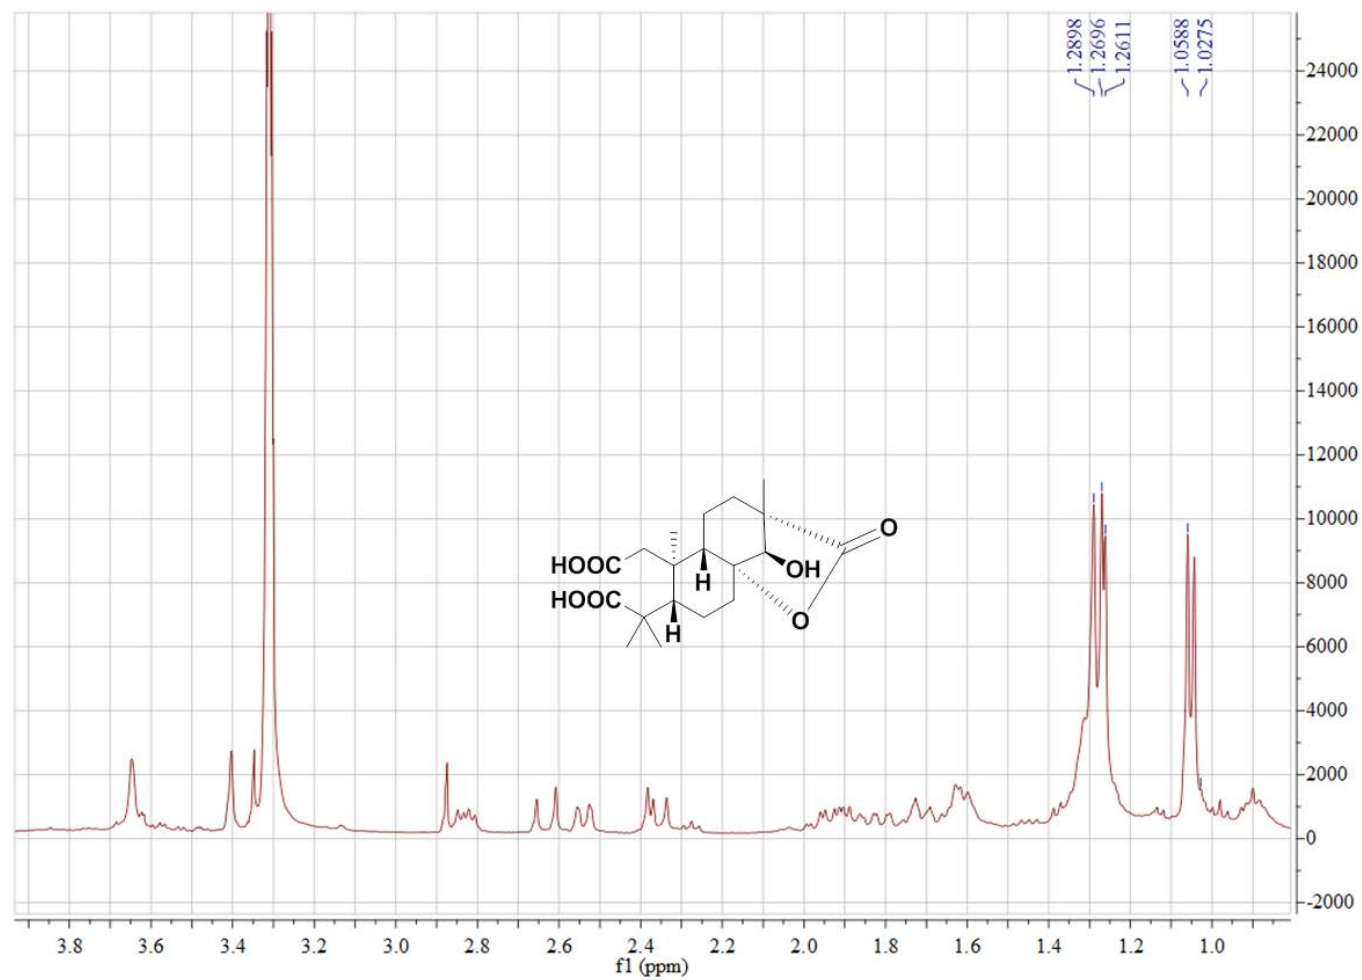

S20  $^{13}\text{C}$  NMR Spectrum of **4** in  $\text{CD}_3\text{OD}$

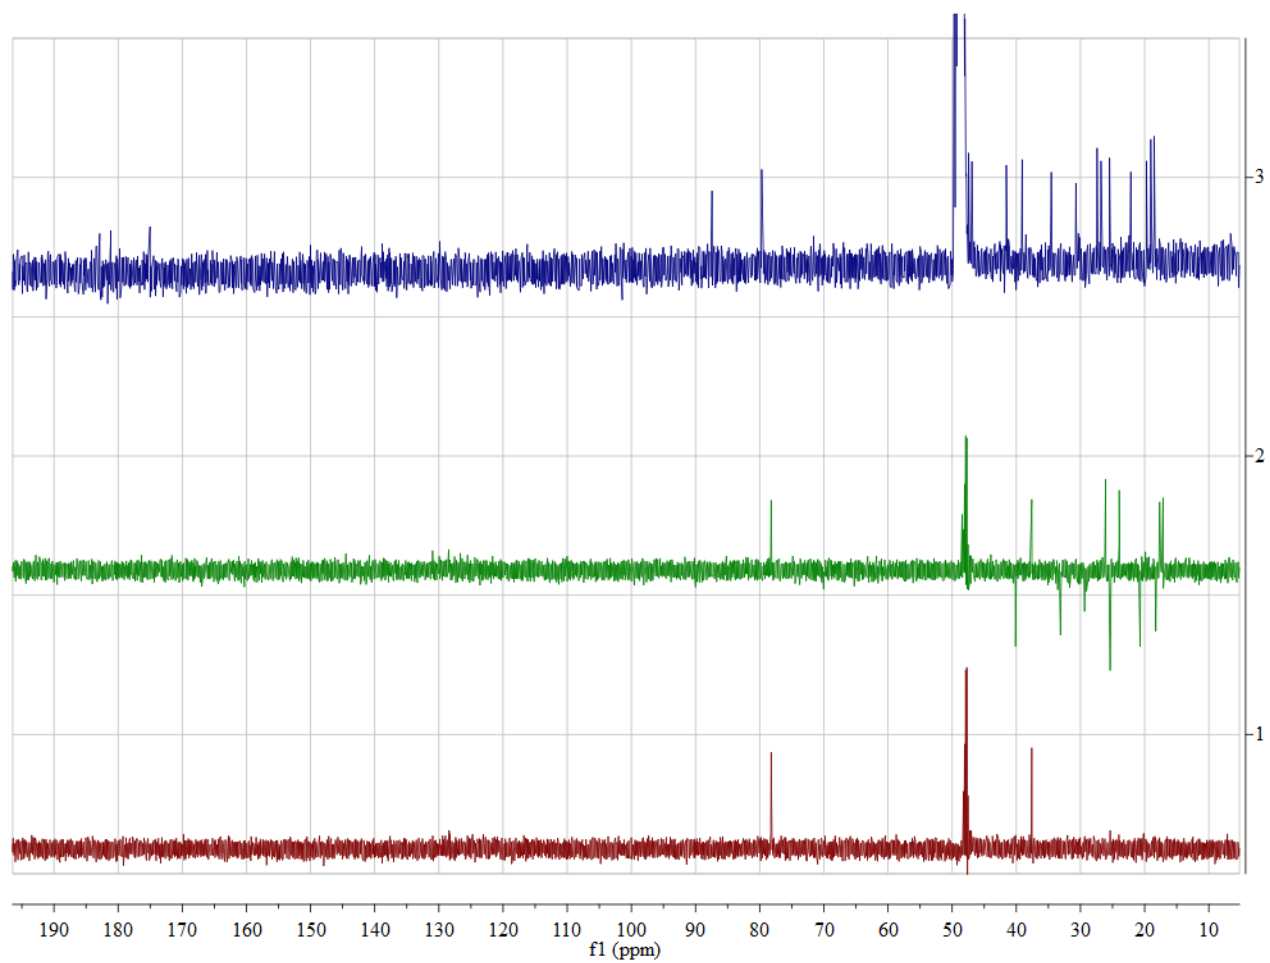



S21  $^1\text{H}$ - $^1\text{H}$  COSY Spectrum of **4** in  $\text{CD}_3\text{OD}$

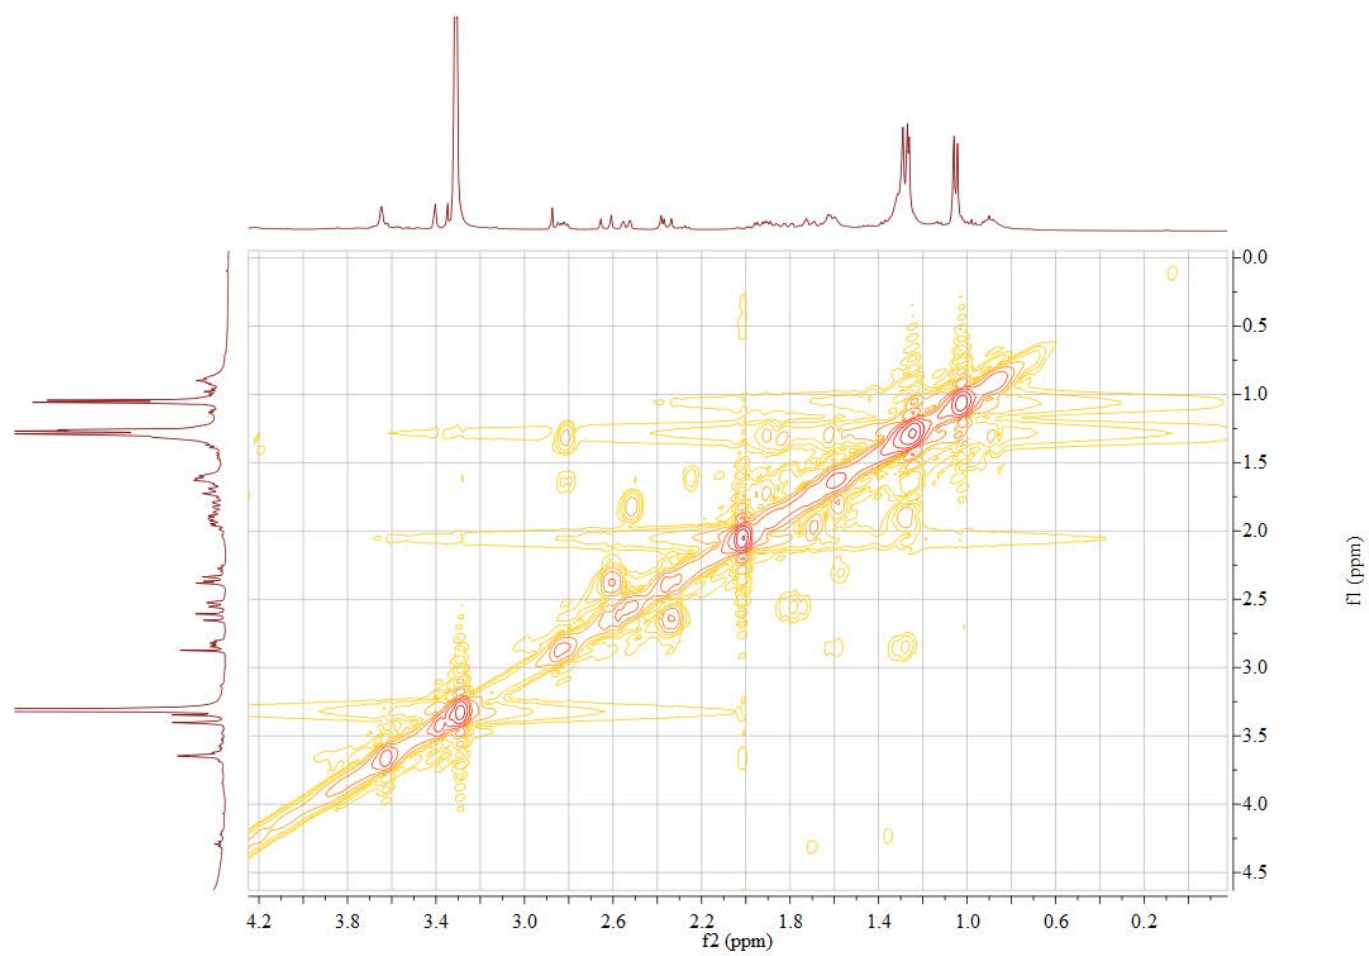

S22 HSQC Spectrum of **4** in CD<sub>3</sub>OD

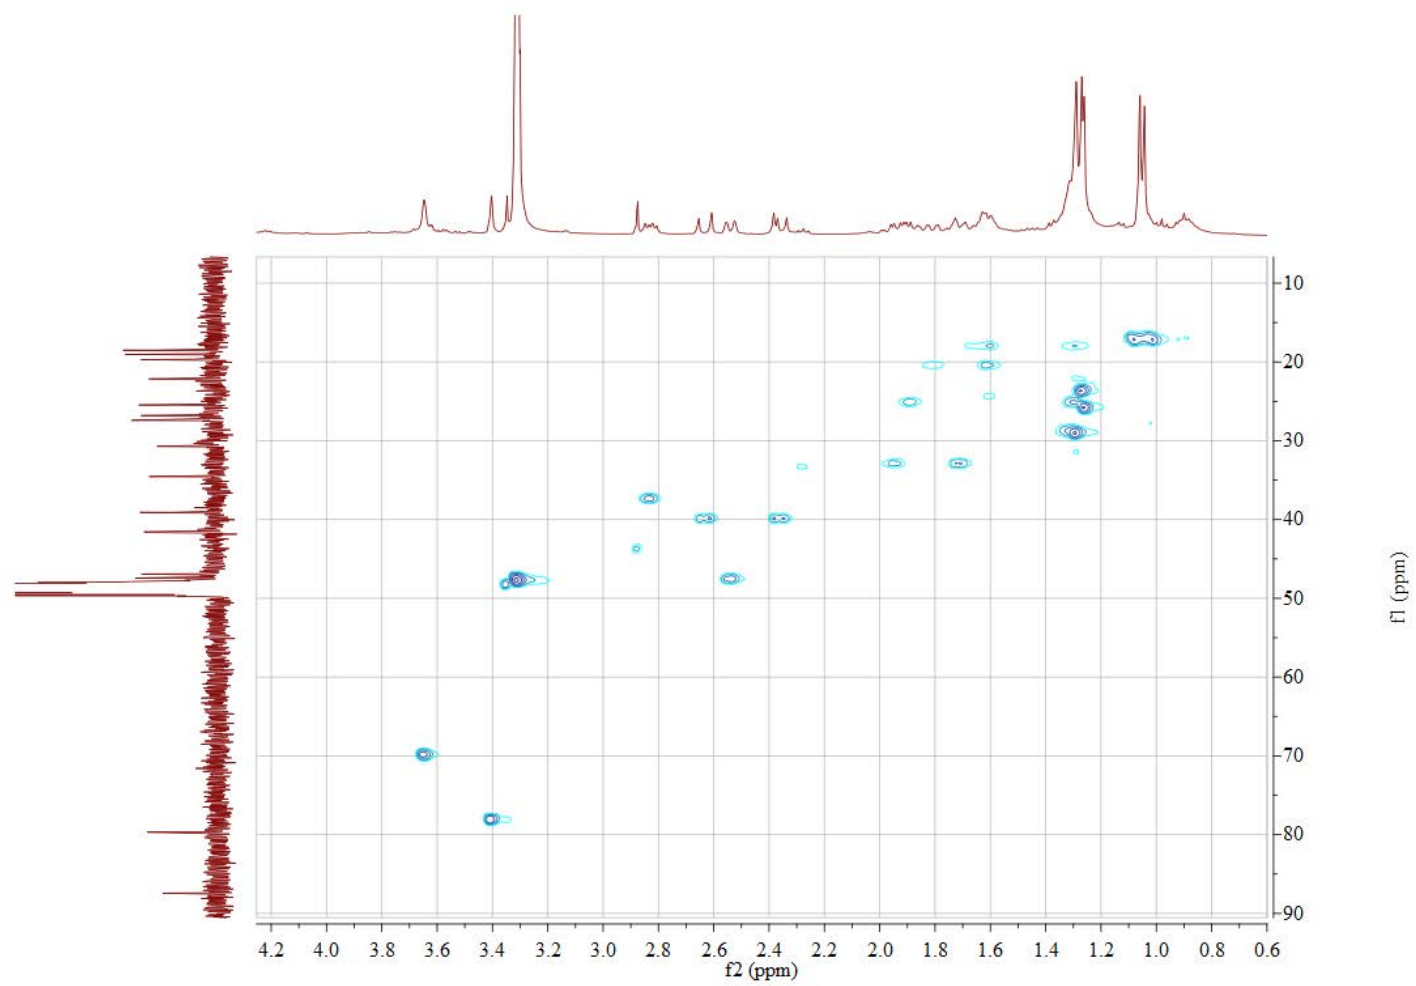

S23 HMBC Spectrum of **4** in CD<sub>3</sub>OD

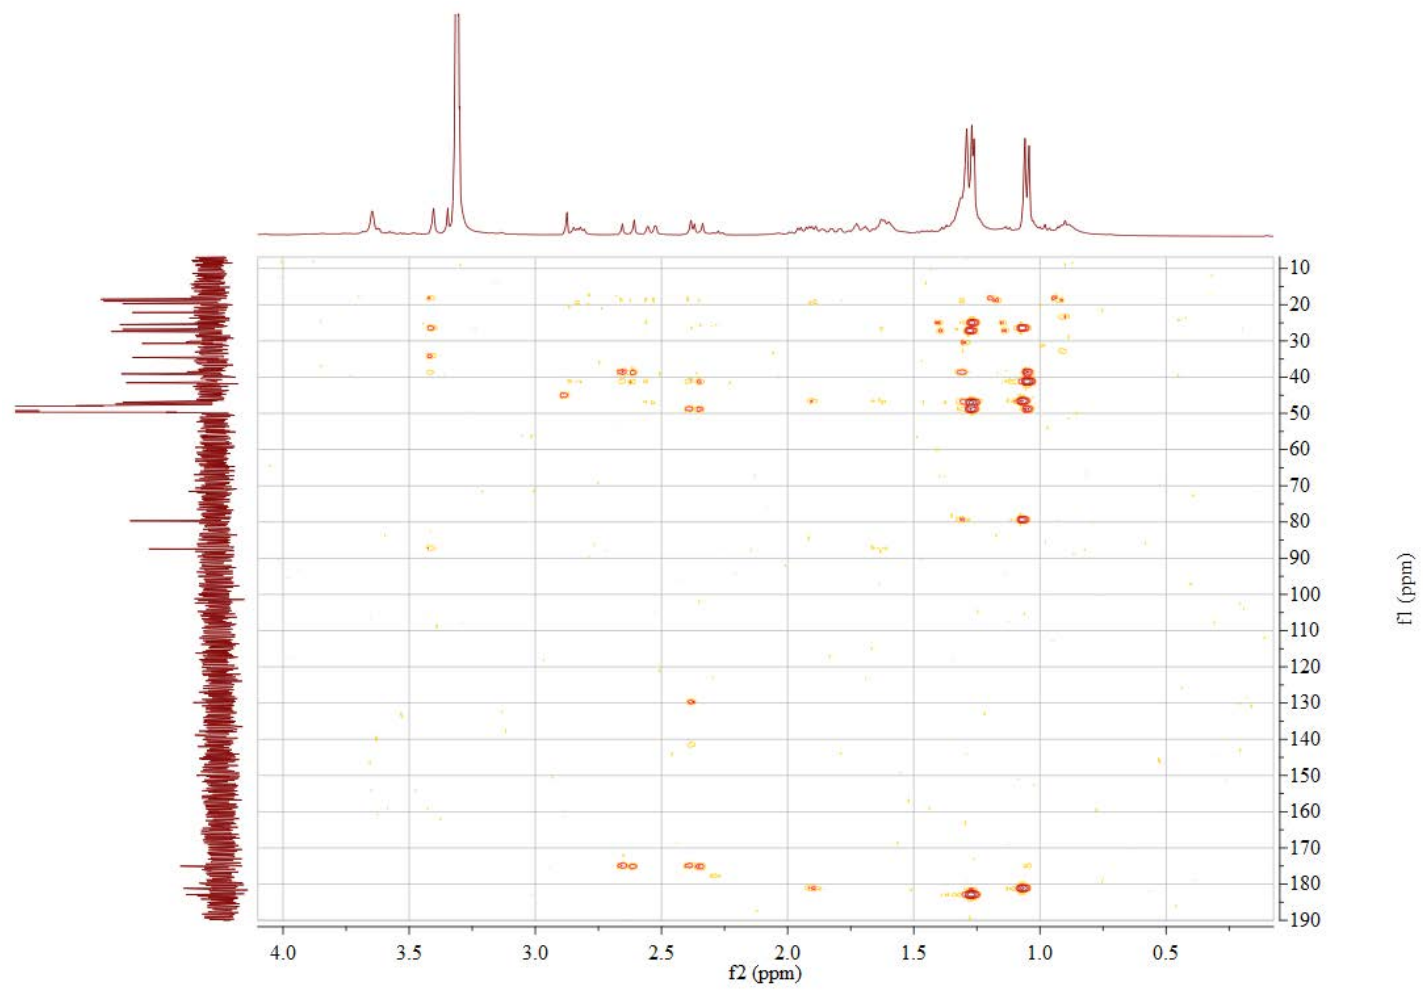

S24 NOESY Spectrum of **4** in CD<sub>3</sub>OD

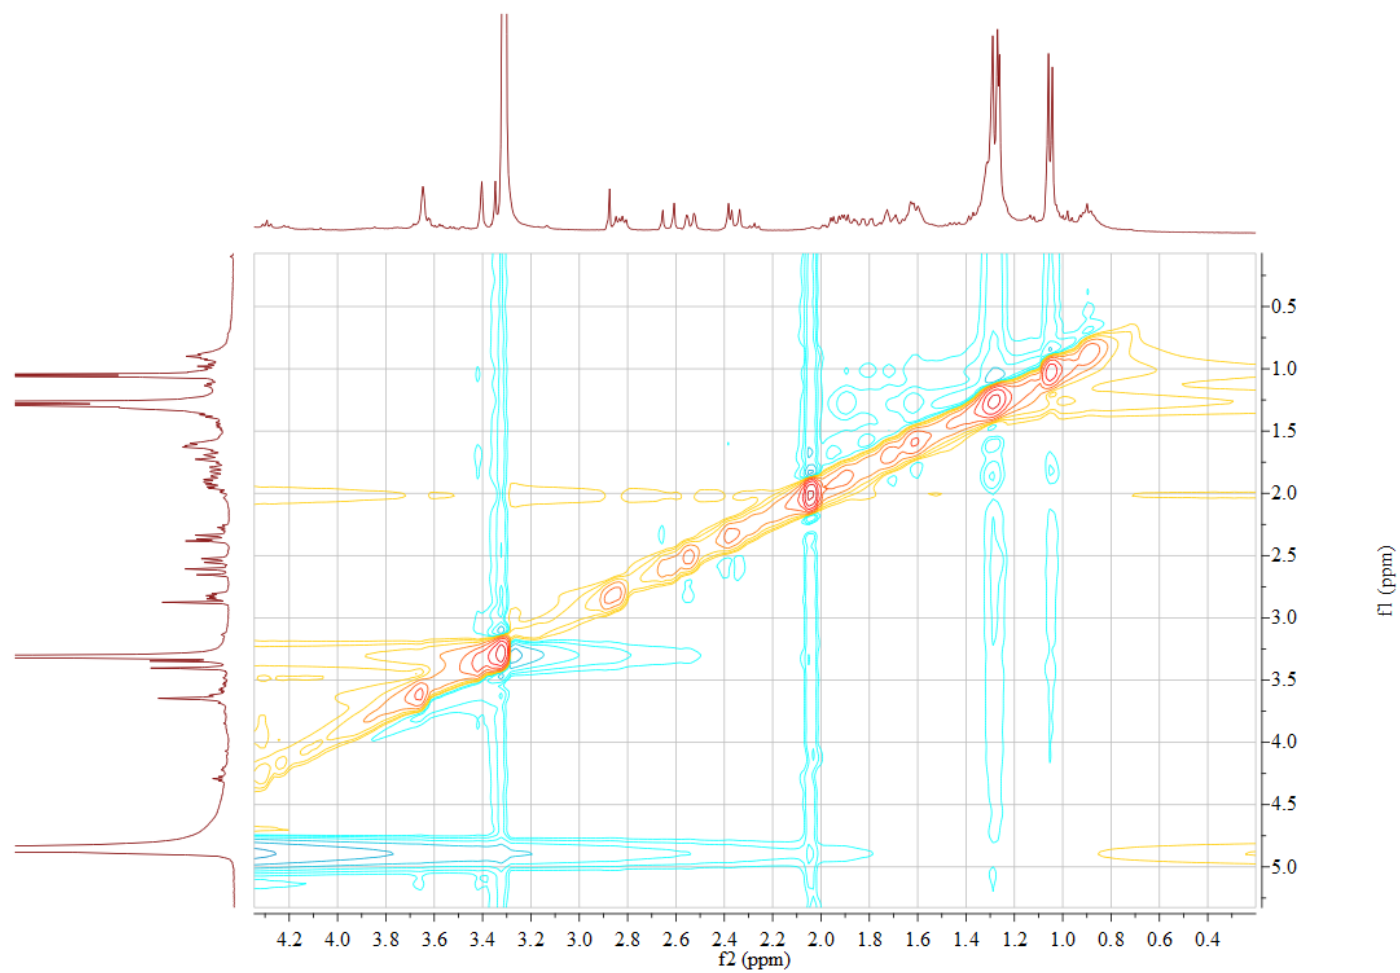

**S25**  $^1\text{H}$  NMR Spectrum of **5** in  $\text{CDCl}_3$

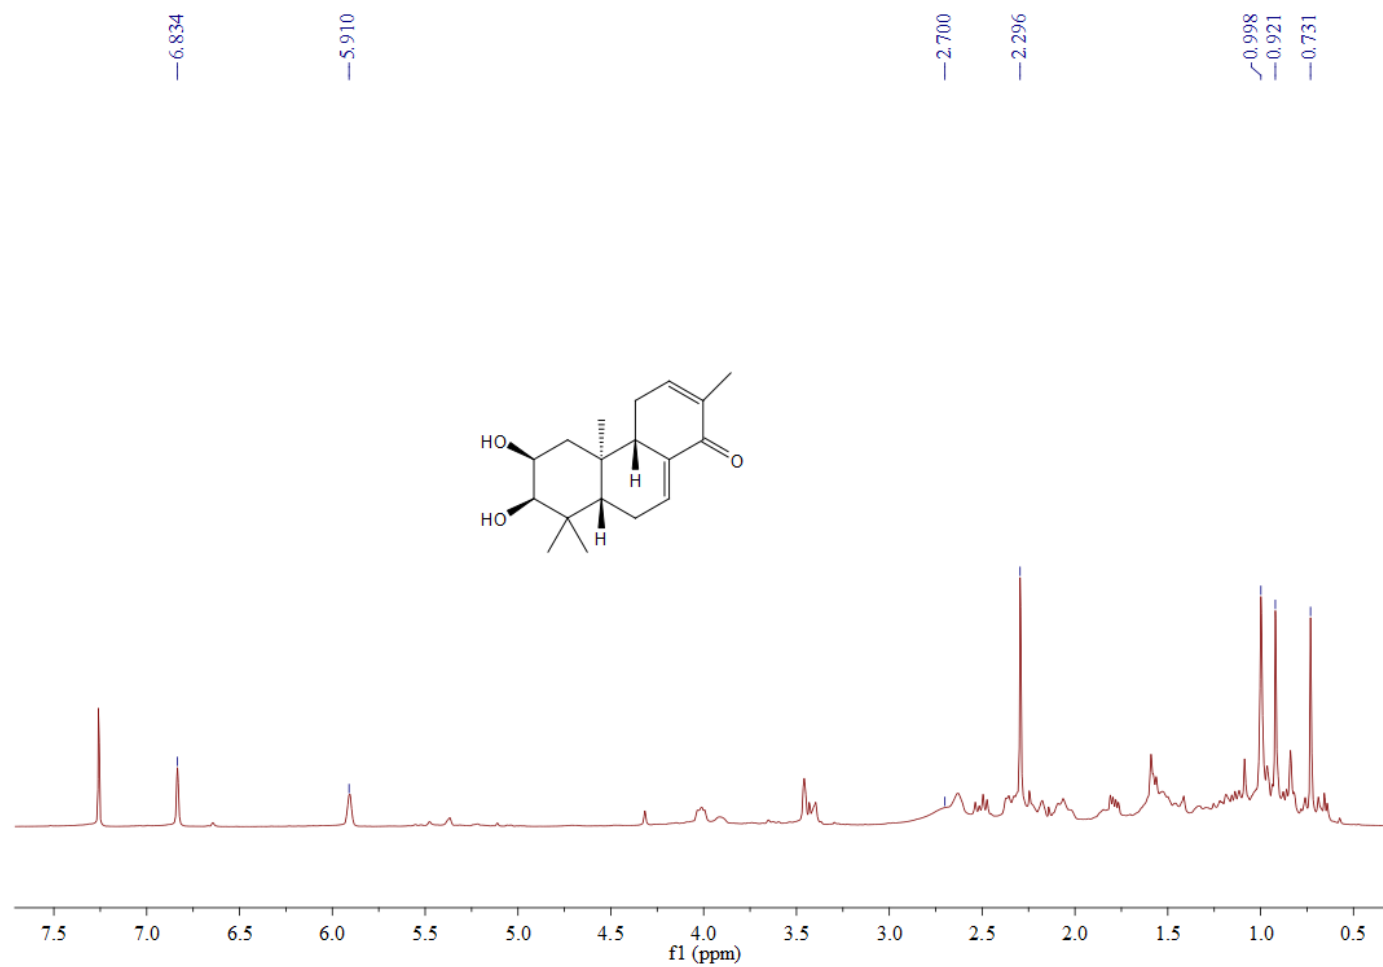

S26  $^{13}\text{C}$  NMR Spectrum of **5** in  $\text{CDCl}_3$

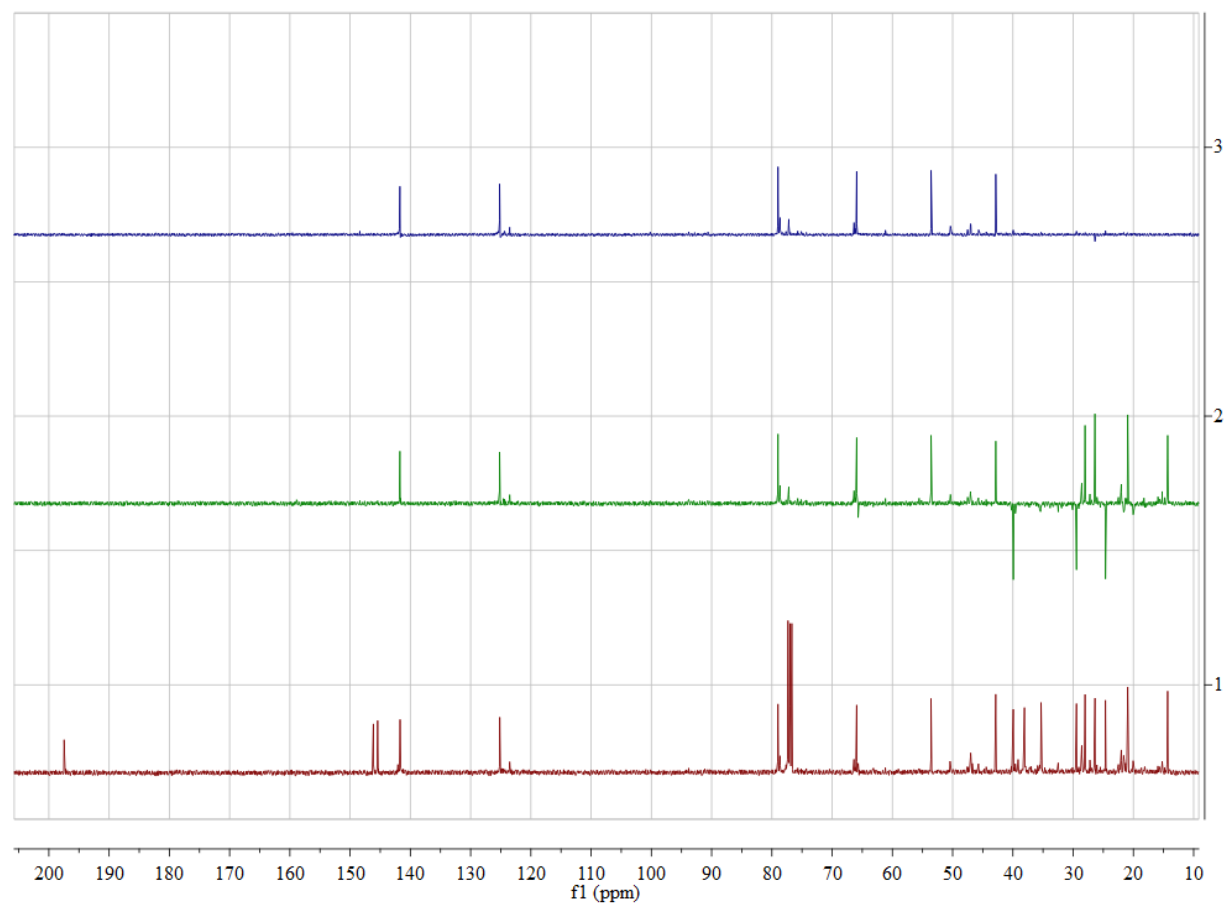

S27 HSQC Spectrum of **5** in CDCl<sub>3</sub>

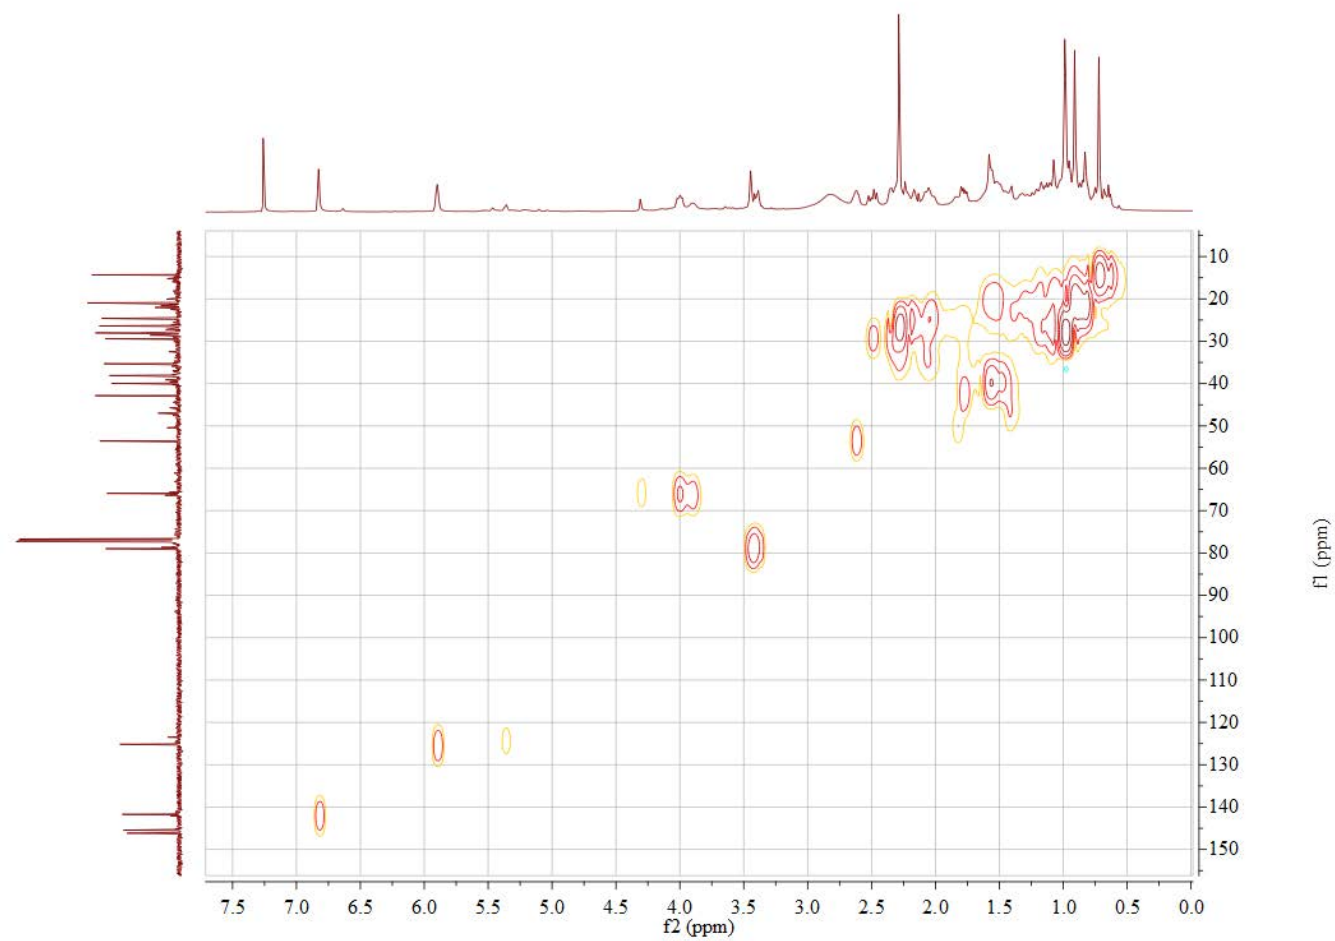

S28 HMBC Spectrum of **5** in CDCl<sub>3</sub>

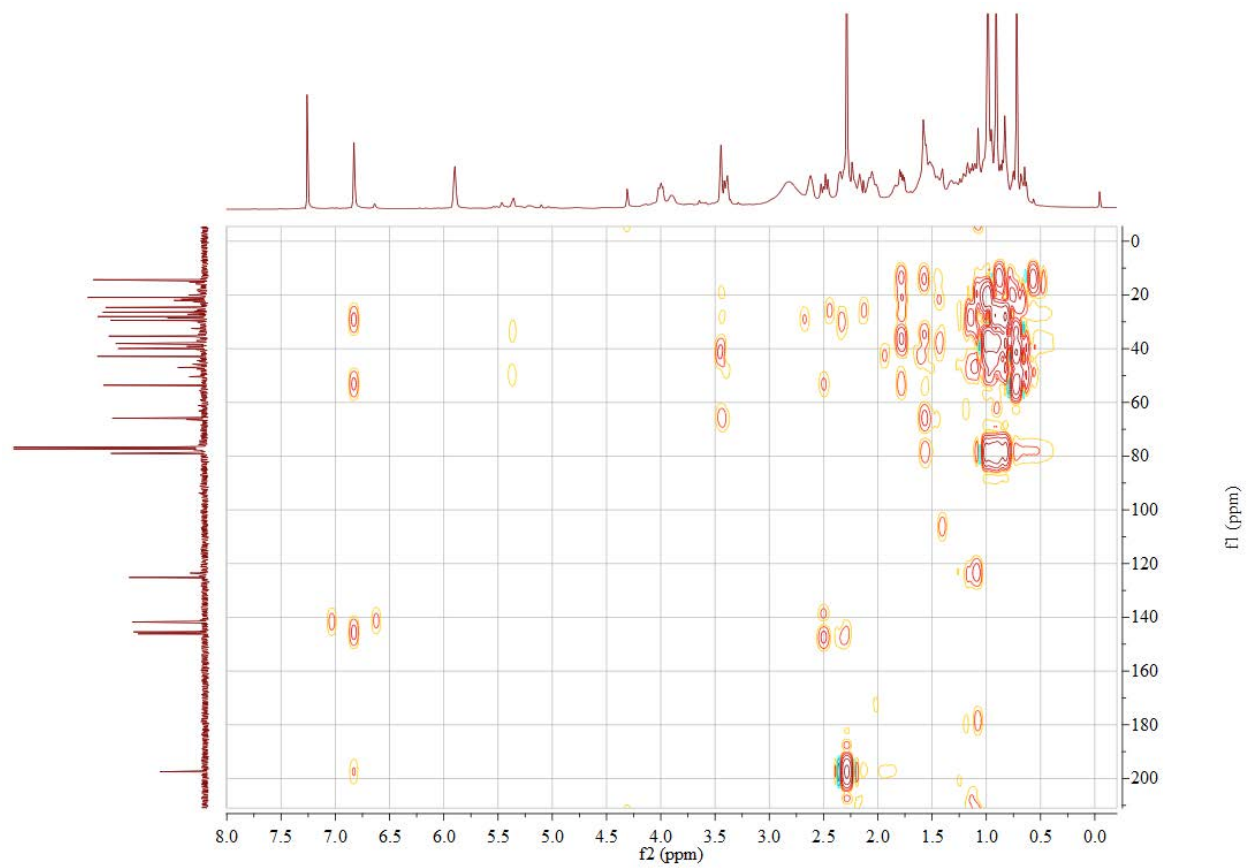



S29 NOESY Spectrum of **5** in CDCl<sub>3</sub>

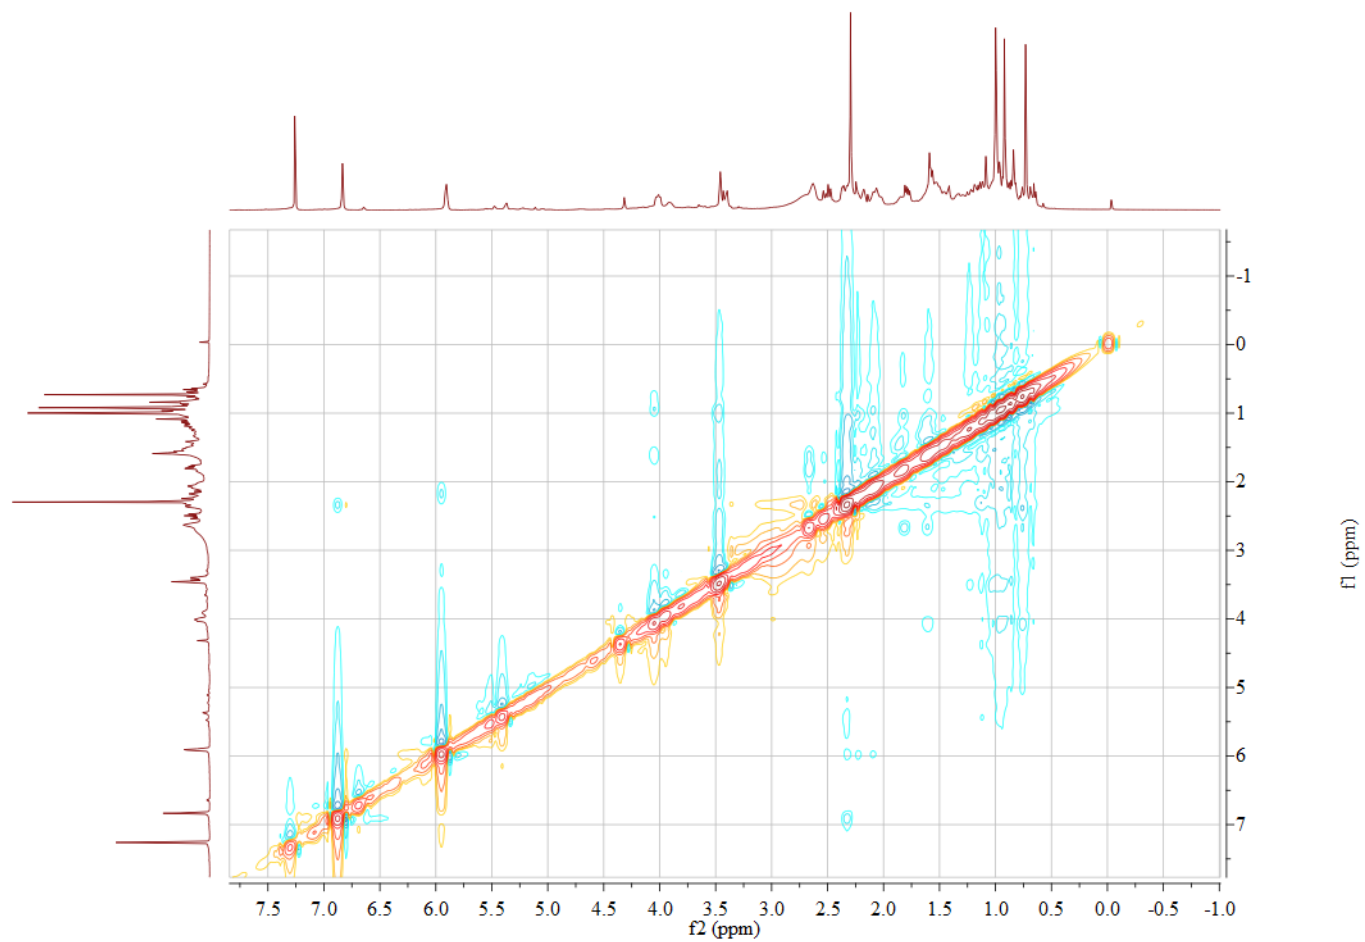

**S30**  $^1\text{H}$  NMR Spectrum of **6** in  $\text{CDCl}_3$

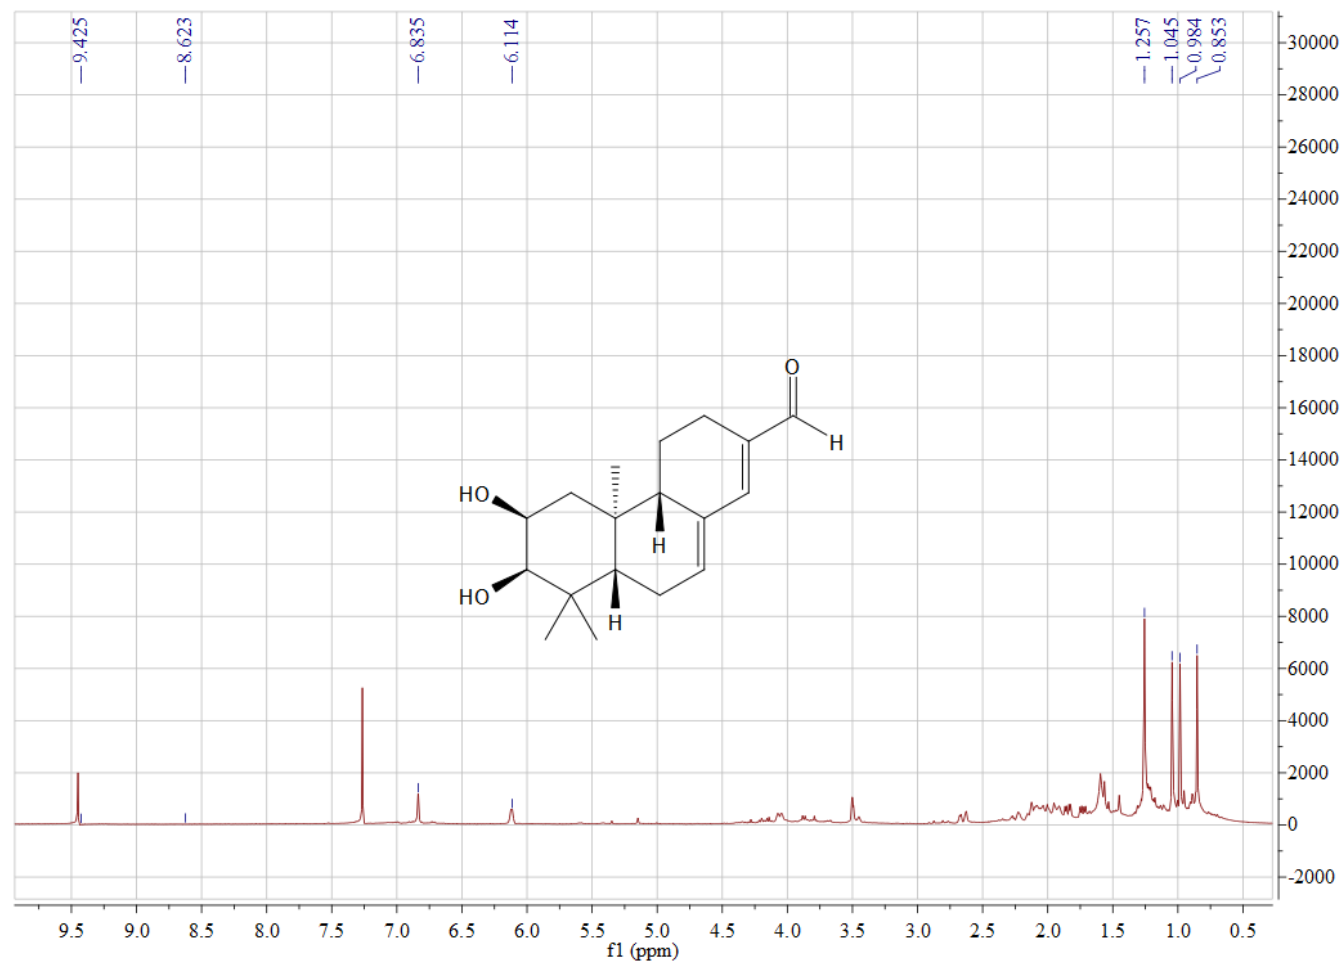

**S31**  $^{13}\text{C}$  NMR Spectrum of **6** in  $\text{CDCl}_3$

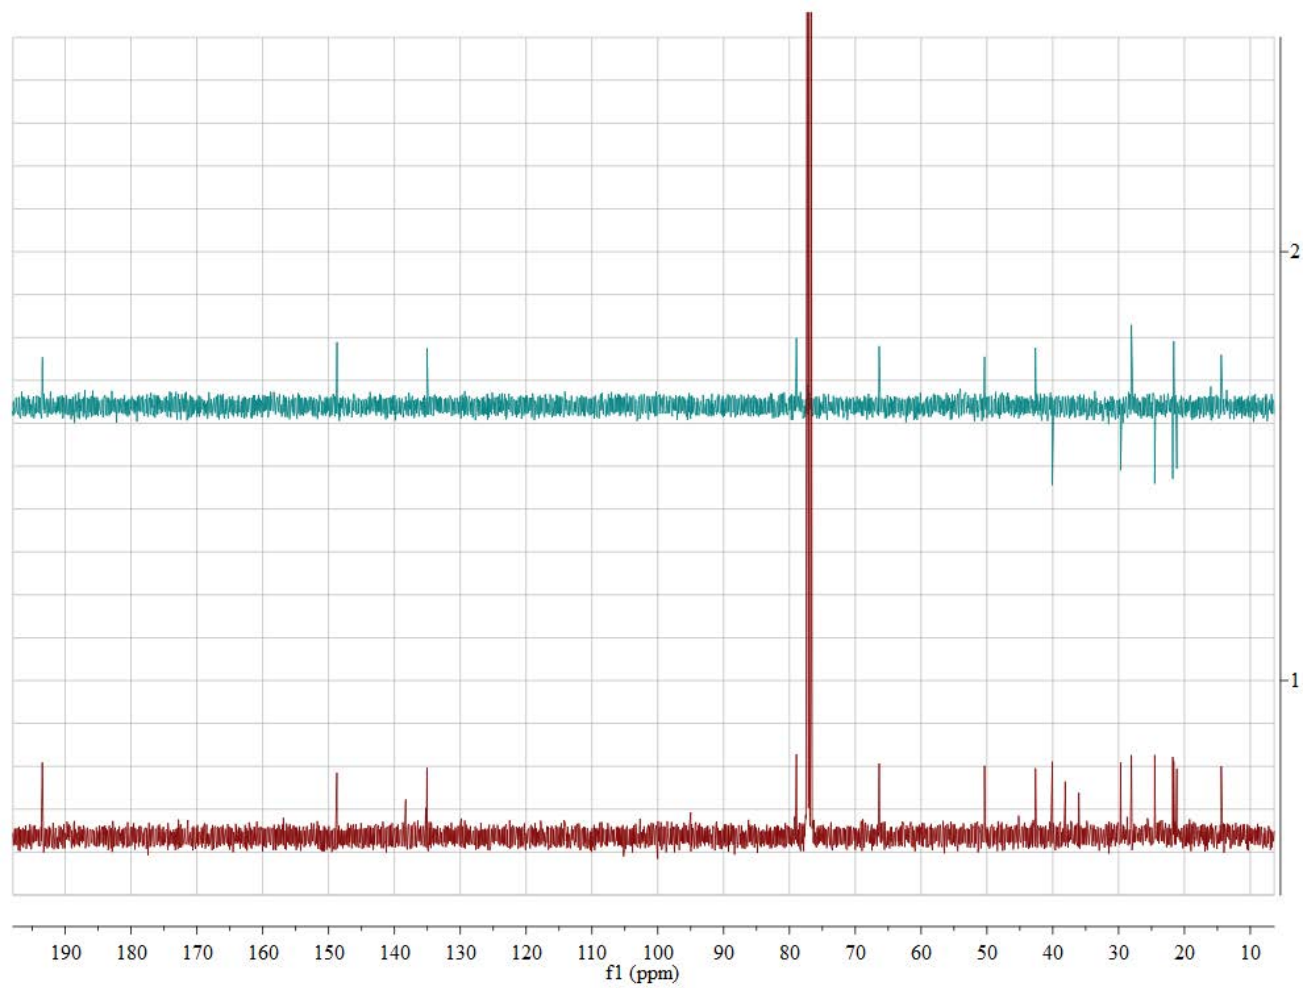

**S32** HSQC Spectrum of **6** in CDCl<sub>3</sub>

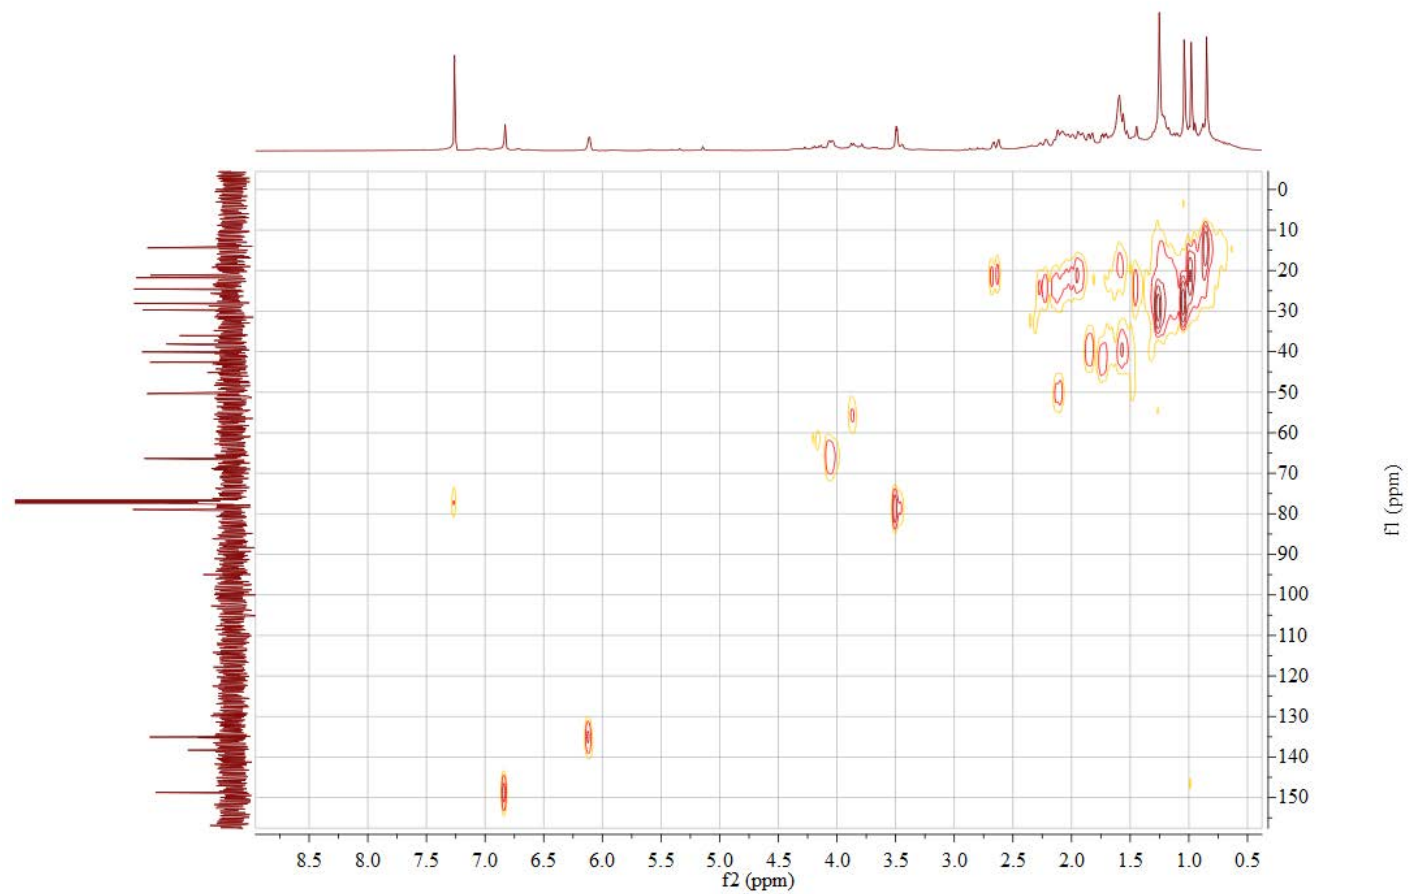

S33 HMBC Spectrum of **6** in CDCl<sub>3</sub>

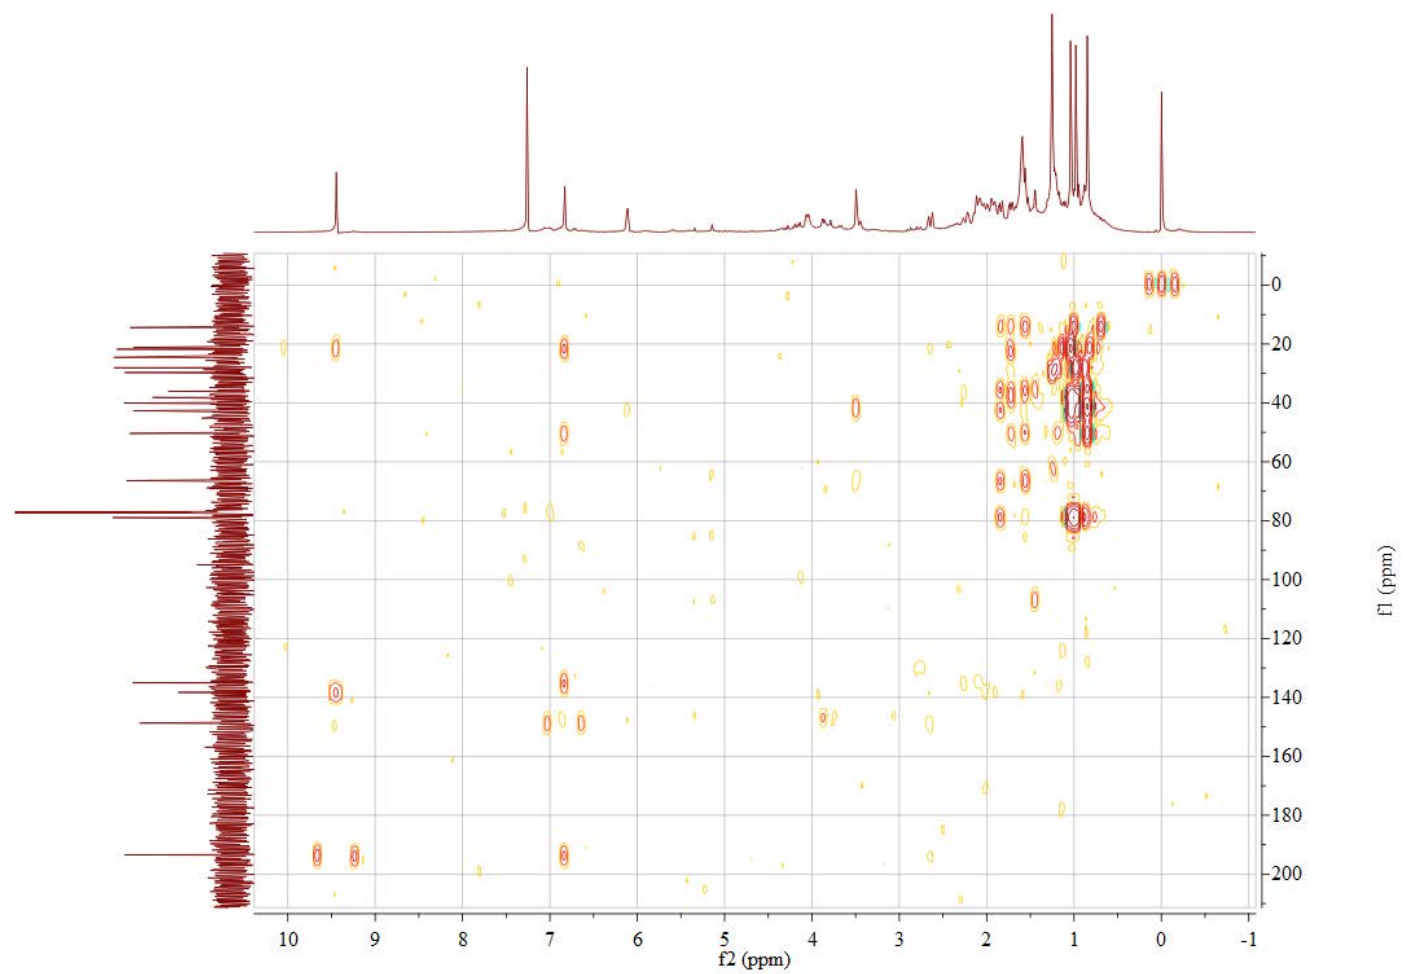

## S34

NOESY Spectrum of **6** in CDCl<sub>3</sub>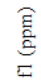

**S35**  $^1\text{H}$  NMR Spectrum of **7** in  $\text{CDCl}_3$

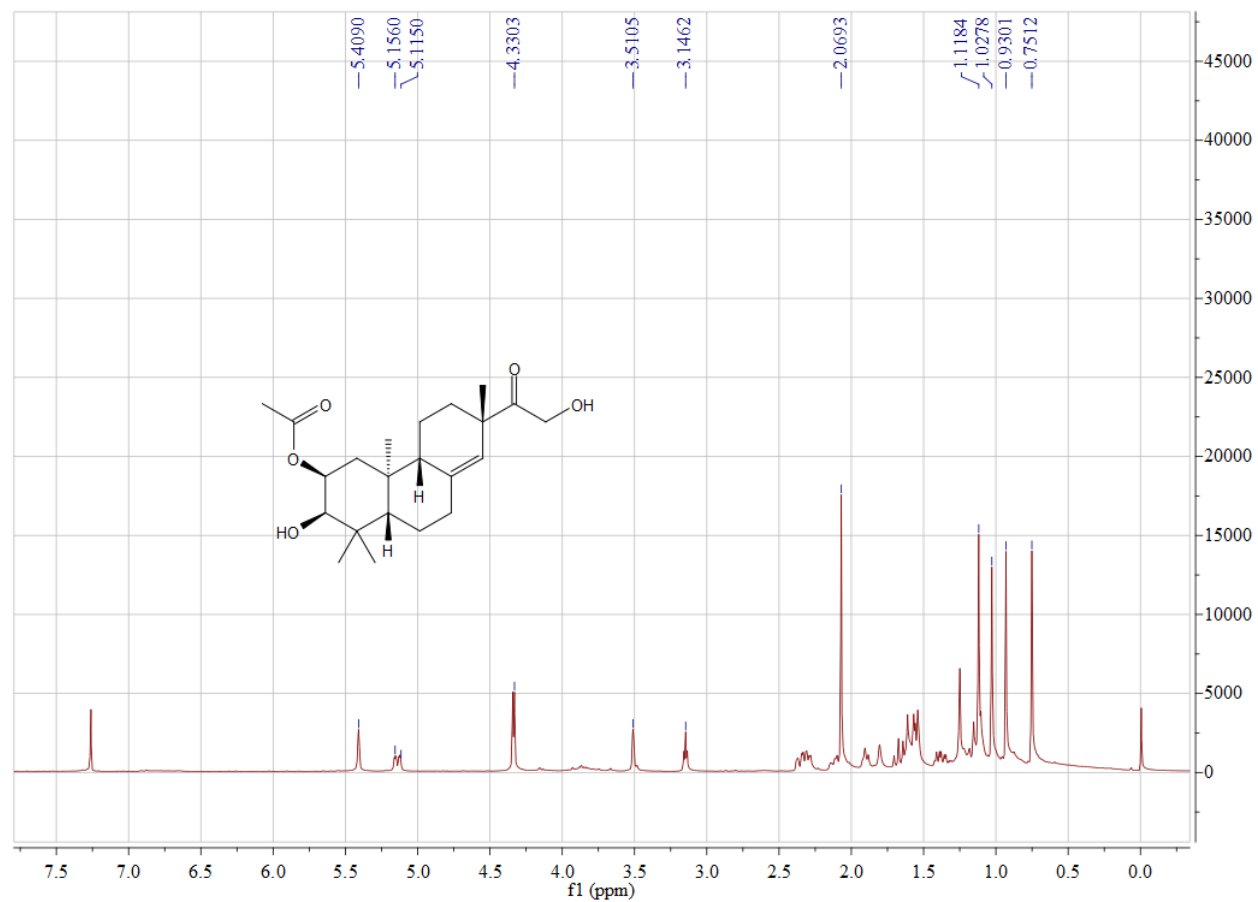

**S36**  $^{13}\text{C}$  NMR Spectrum of **7** in  $\text{CDCl}_3$

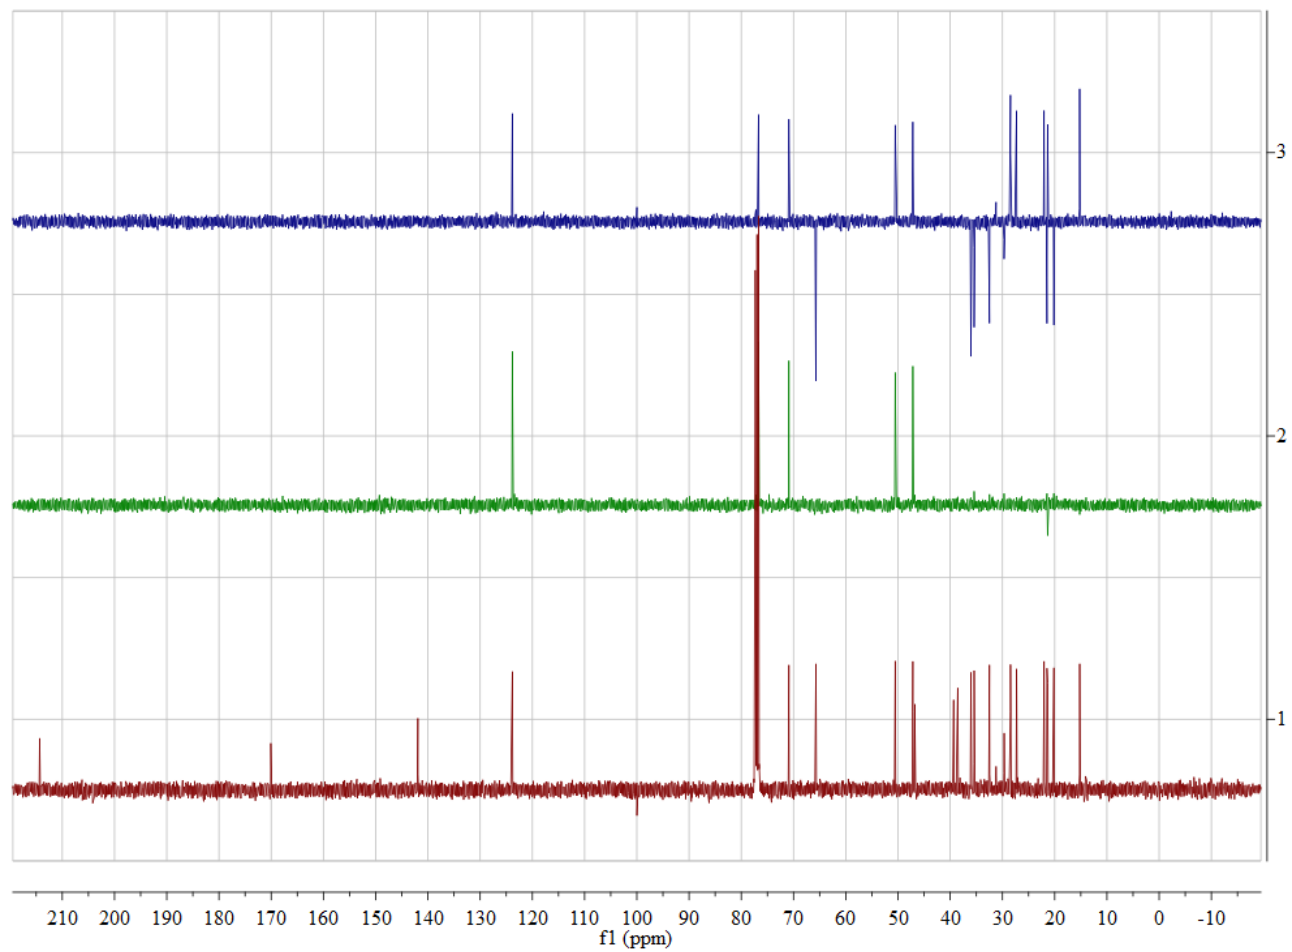



**S37**  $^1\text{H}$ - $^1\text{H}$  COSY Spectrum of **7** in  $\text{CDCl}_3$

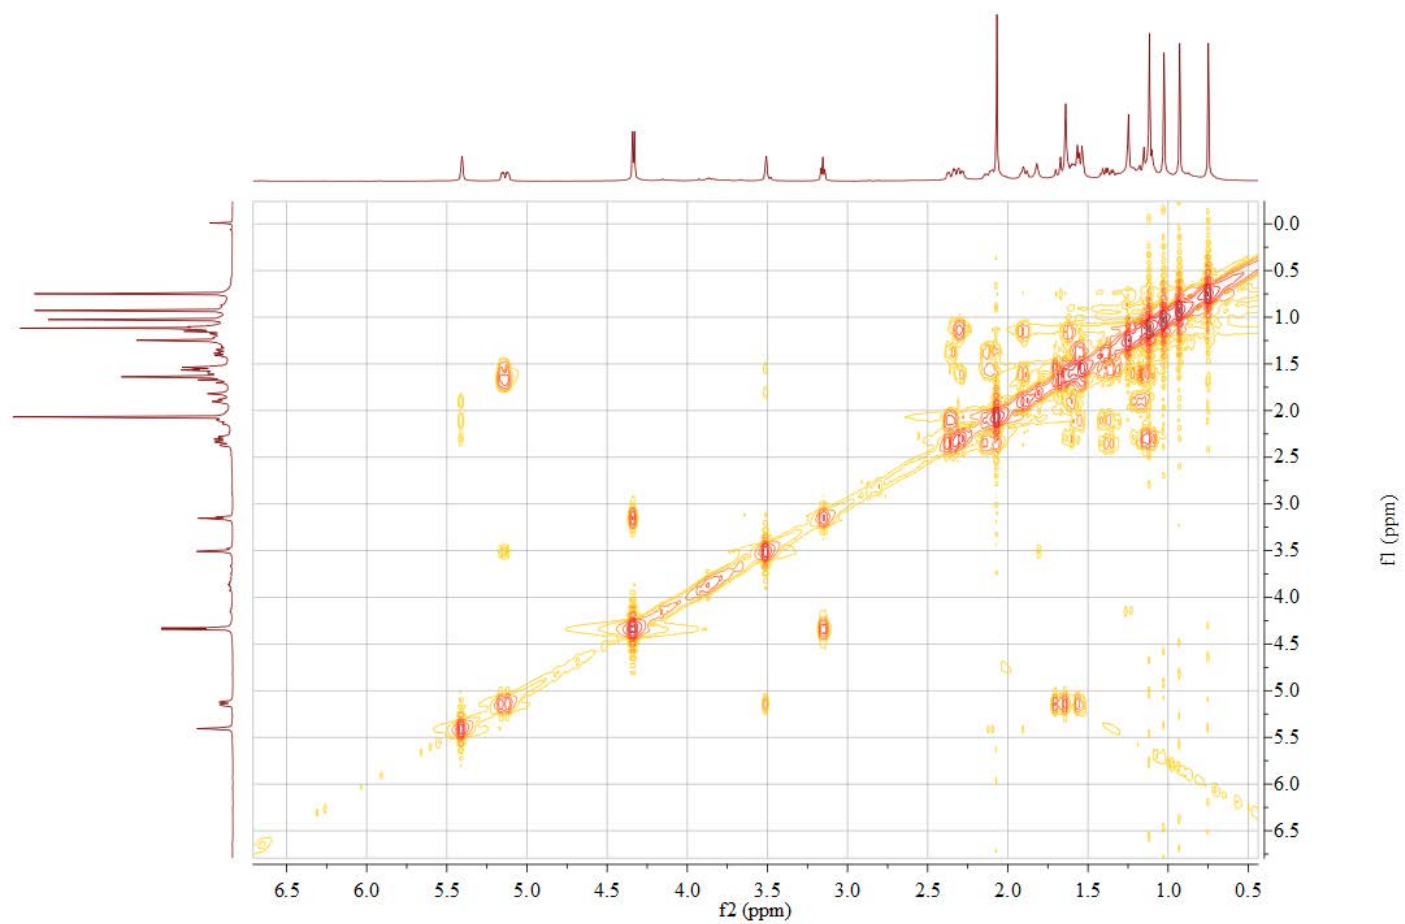

S38 HSQC Spectrum of **7** in CDCl<sub>3</sub>

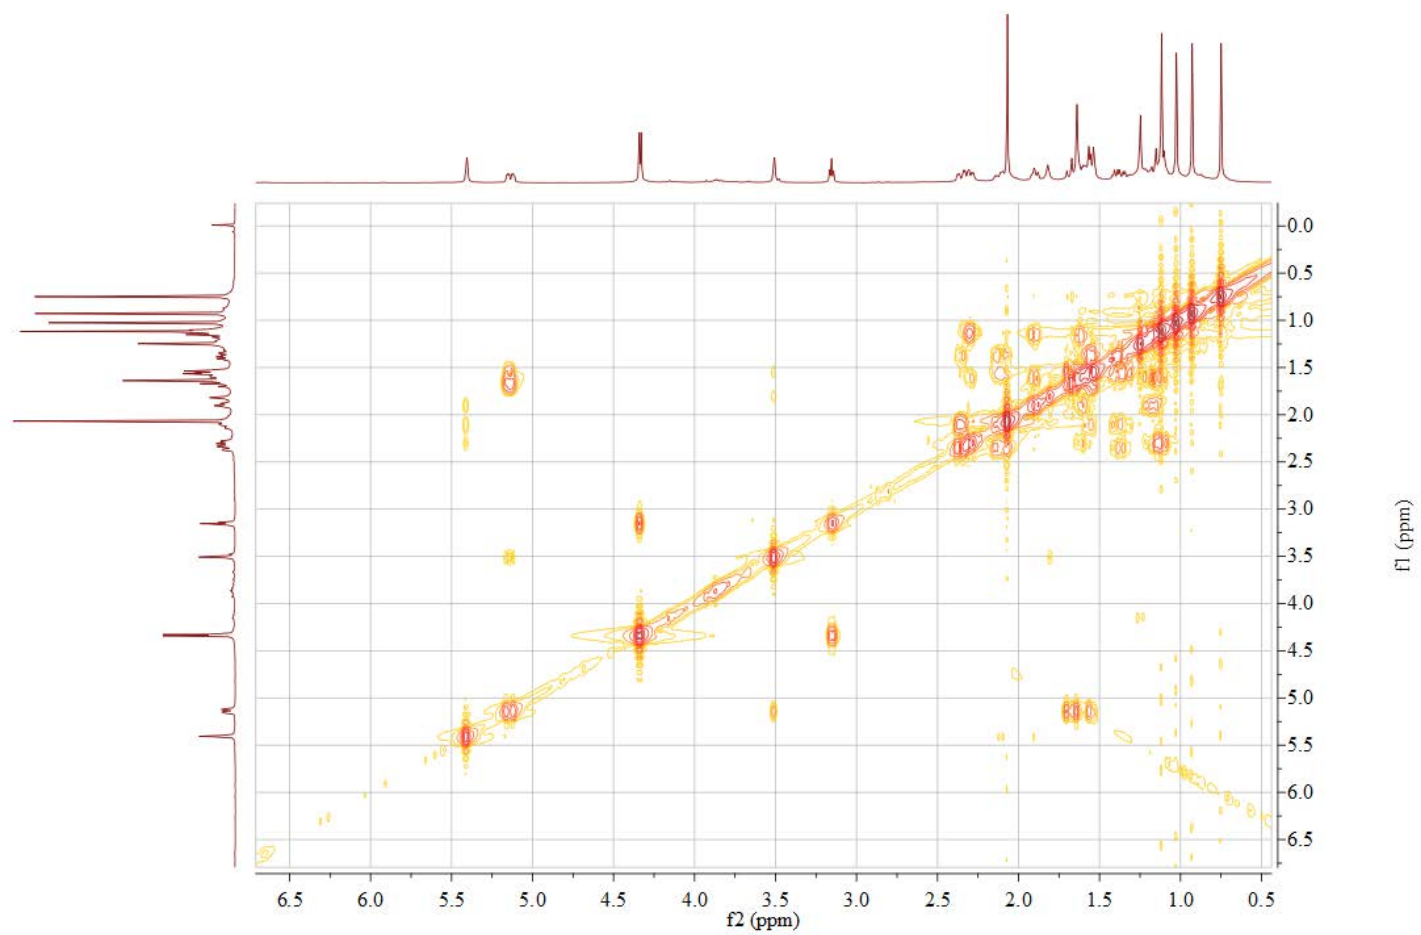

**S39**     HMBC Spectrum of **7** in CDCl<sub>3</sub>

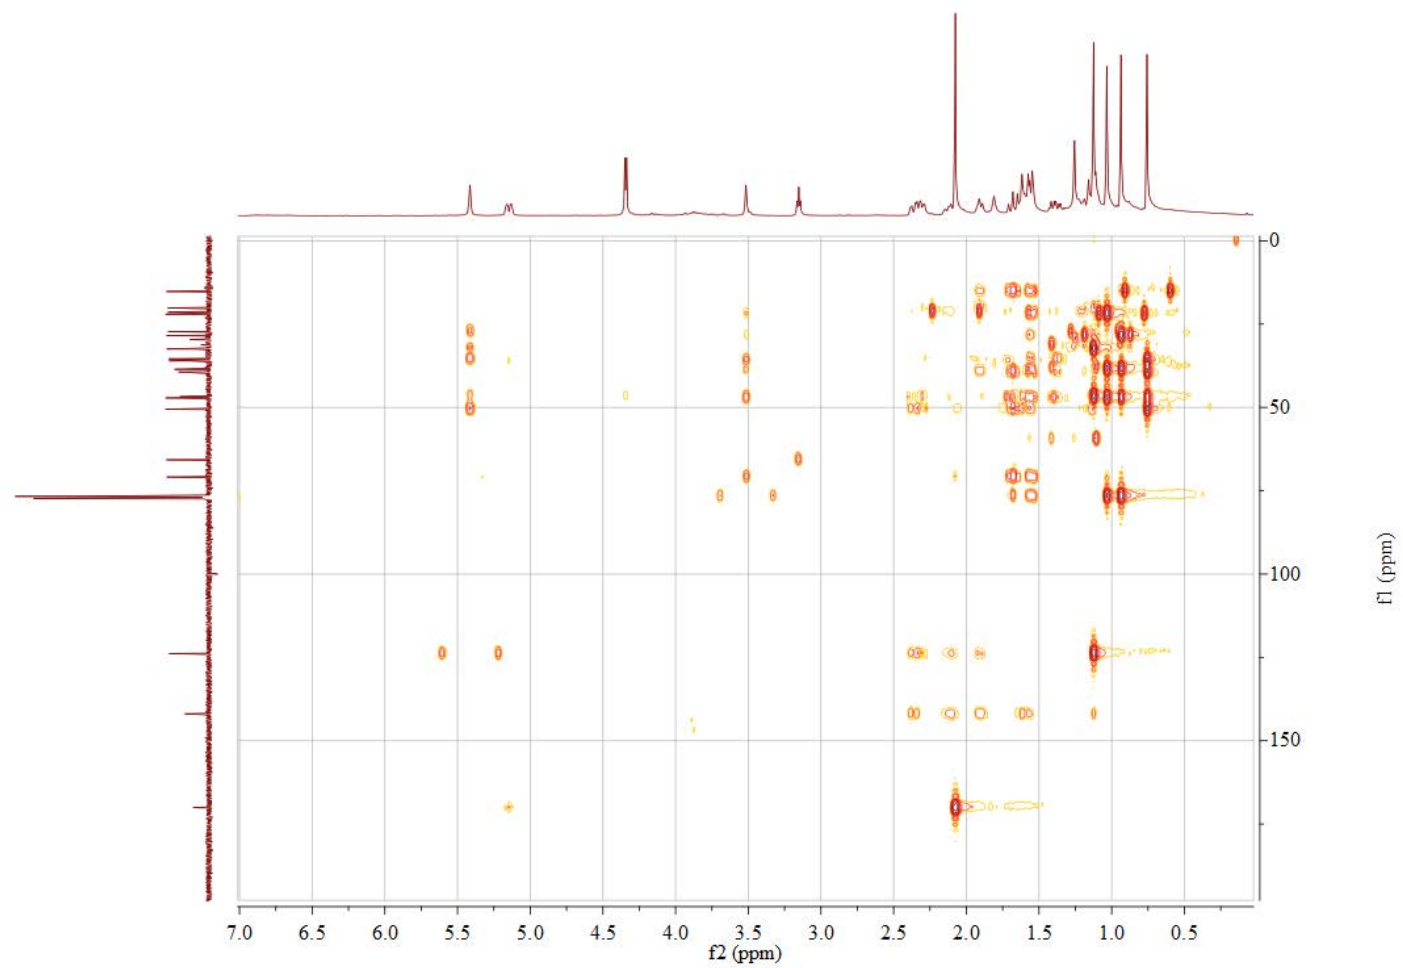

**S40** NOESY Spectrum of **7** in CDCl<sub>3</sub>

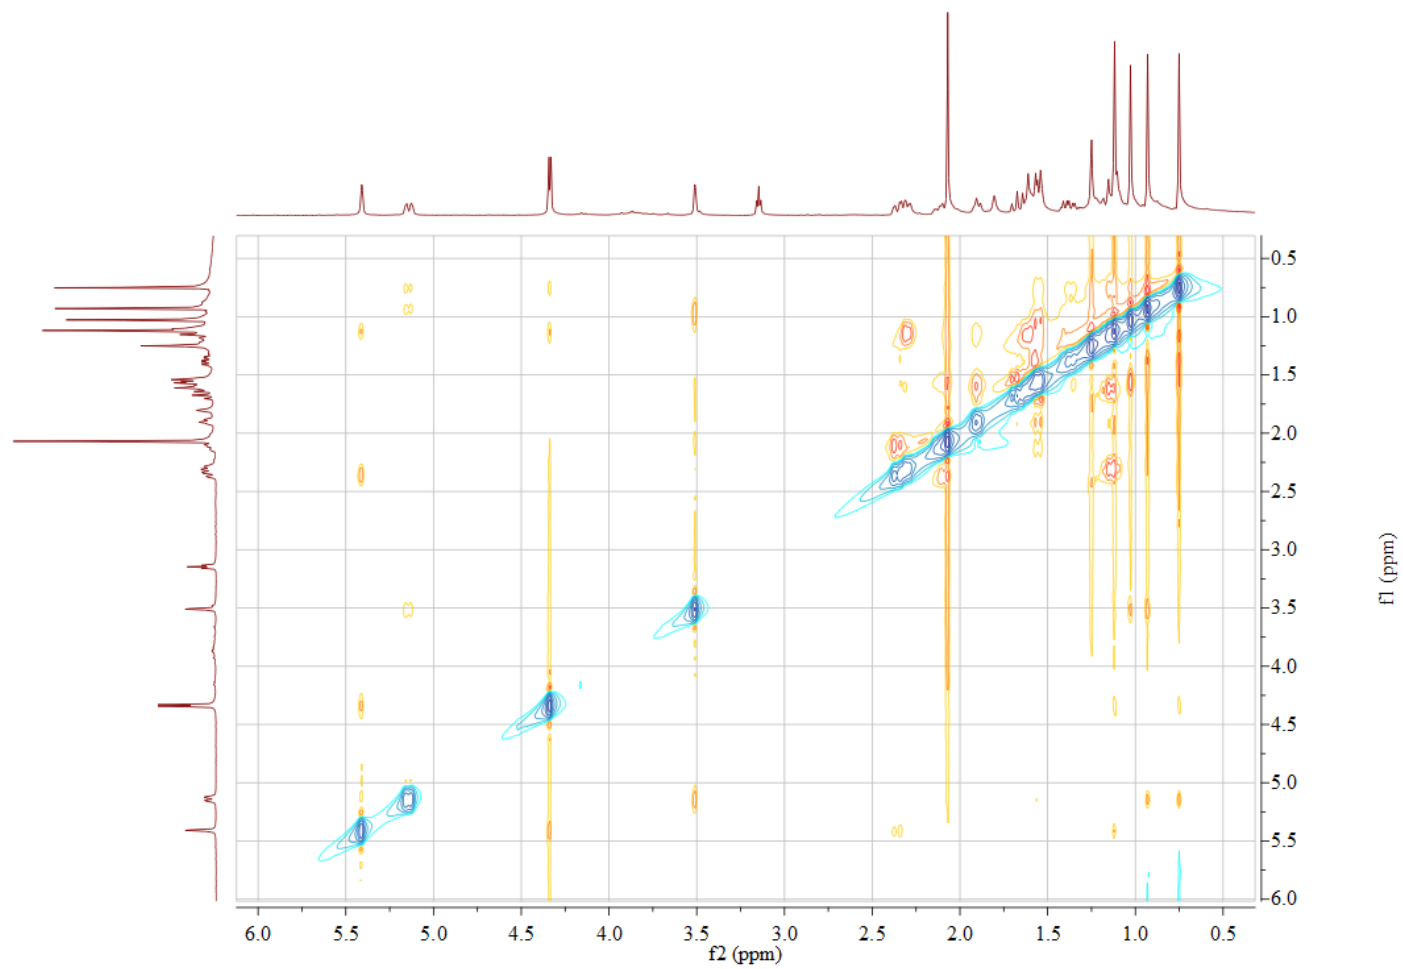

**S41**  $^1\text{H}$  NMR Spectrum of **8** in  $\text{CD}_3\text{OD}$

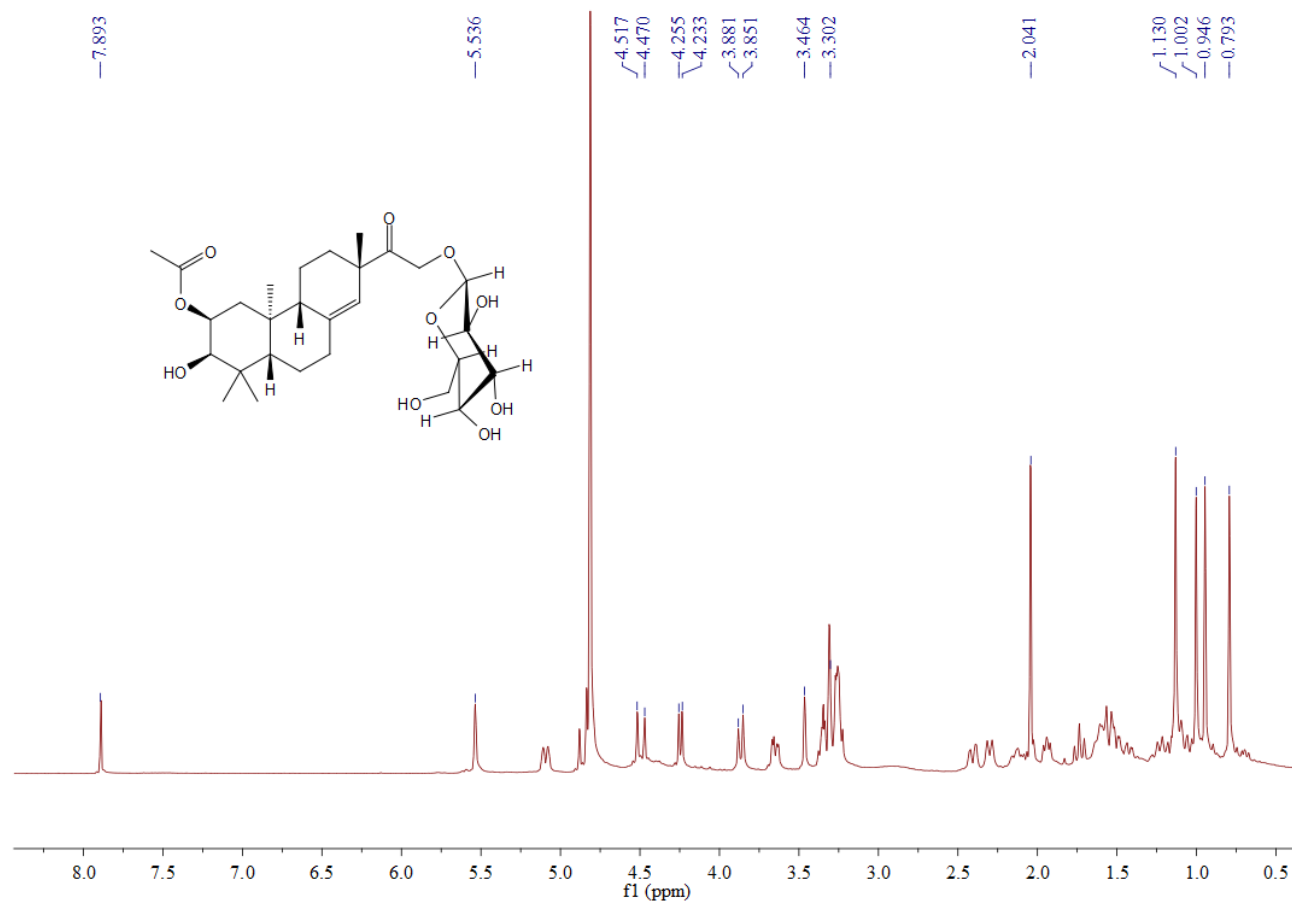

S42  $^{13}\text{C}$  NMR Spectrum of **8** in  $\text{CD}_3\text{OD}$

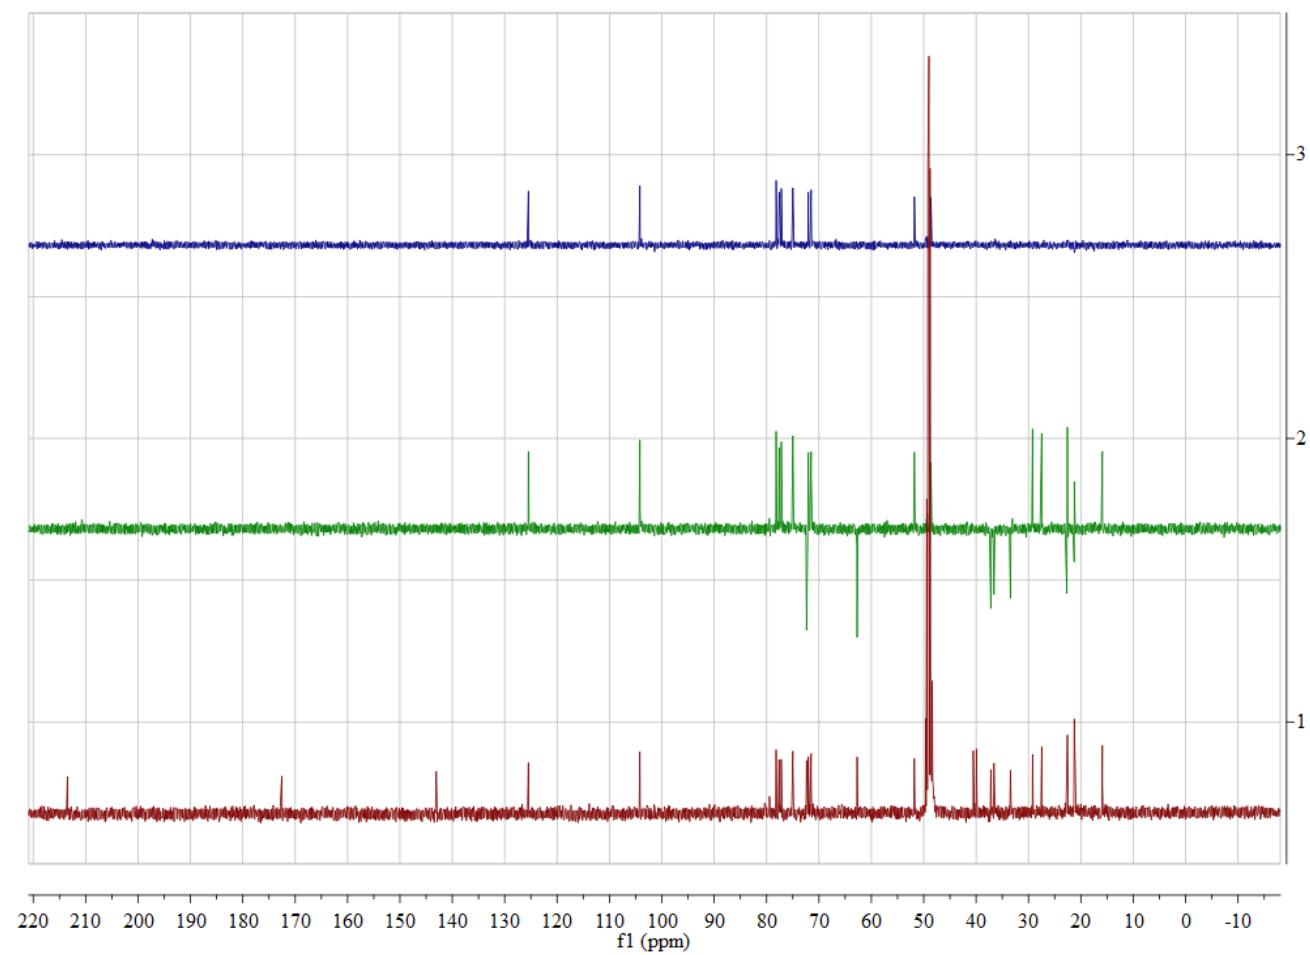

S43  $^1\text{H}$ - $^1\text{H}$  COSY Spectrum of **8** in  $\text{CD}_3\text{OD}$

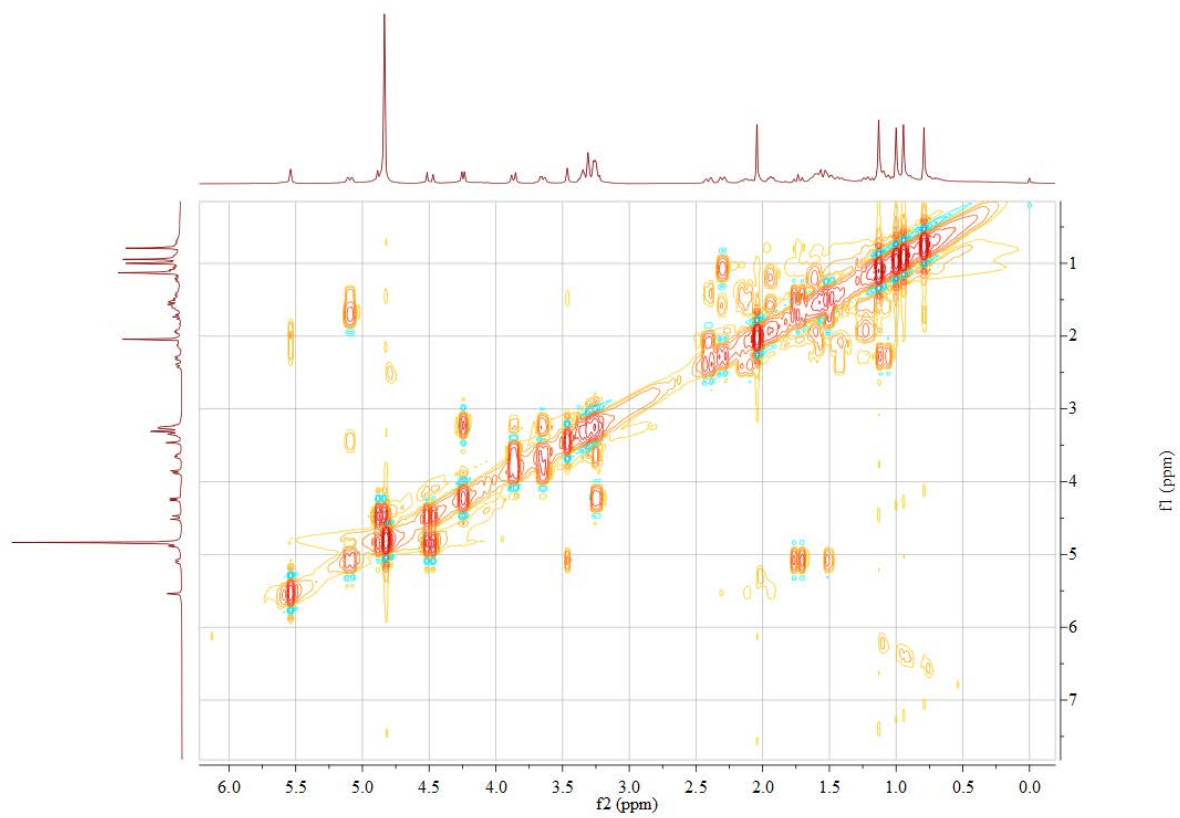

S44 HSQC Spectrum of **8** in CD<sub>3</sub>OD

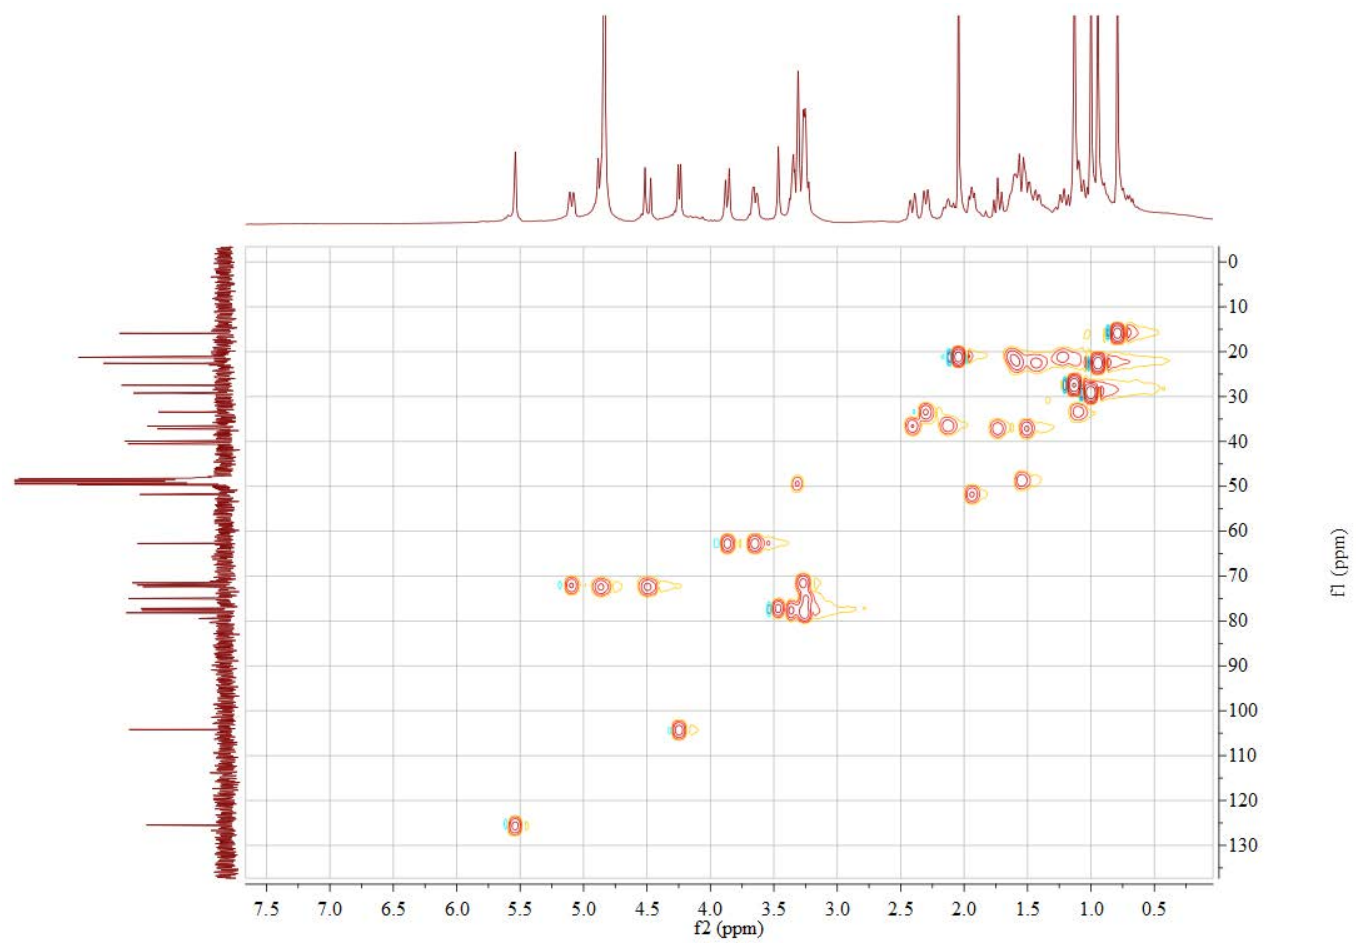



S45 HMBC Spectrum of **8** in CD<sub>3</sub>OD

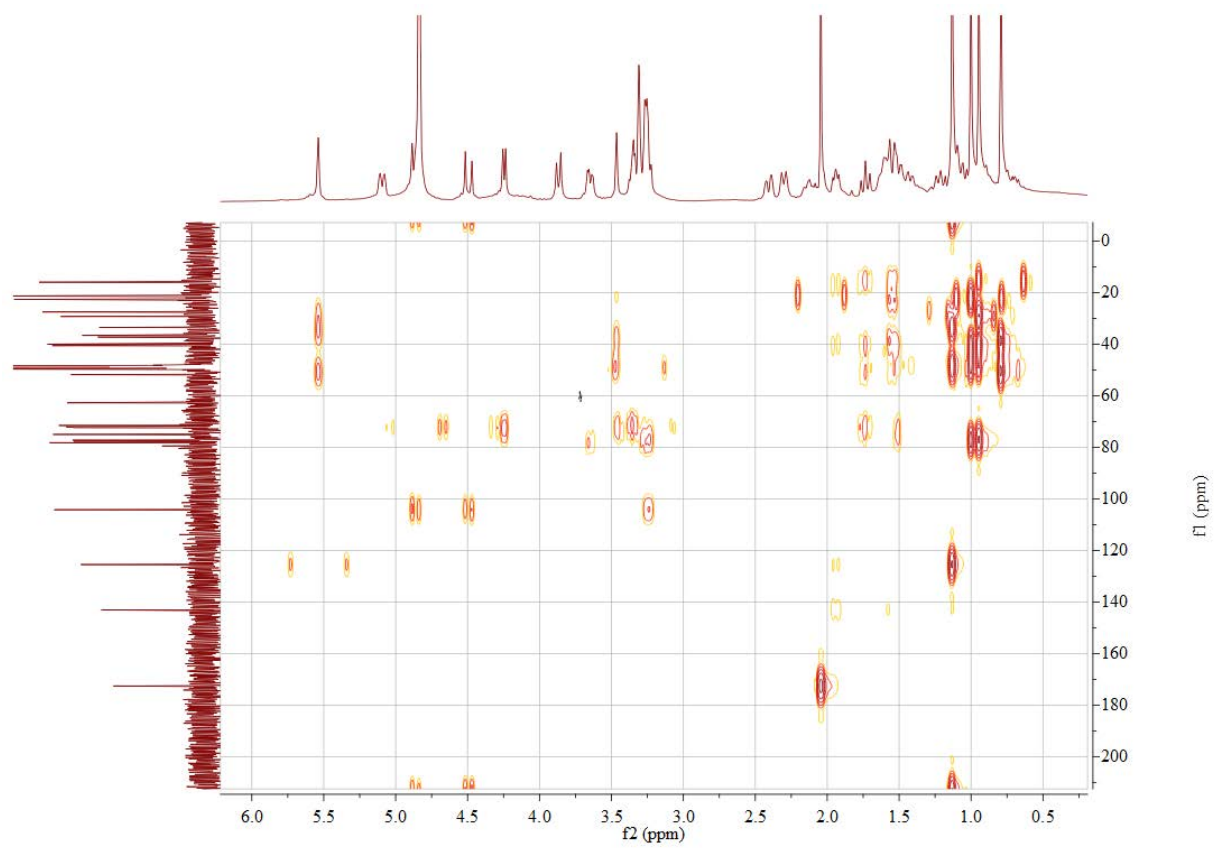

S46 NOESY Spectrum of **8** in CD<sub>3</sub>OD

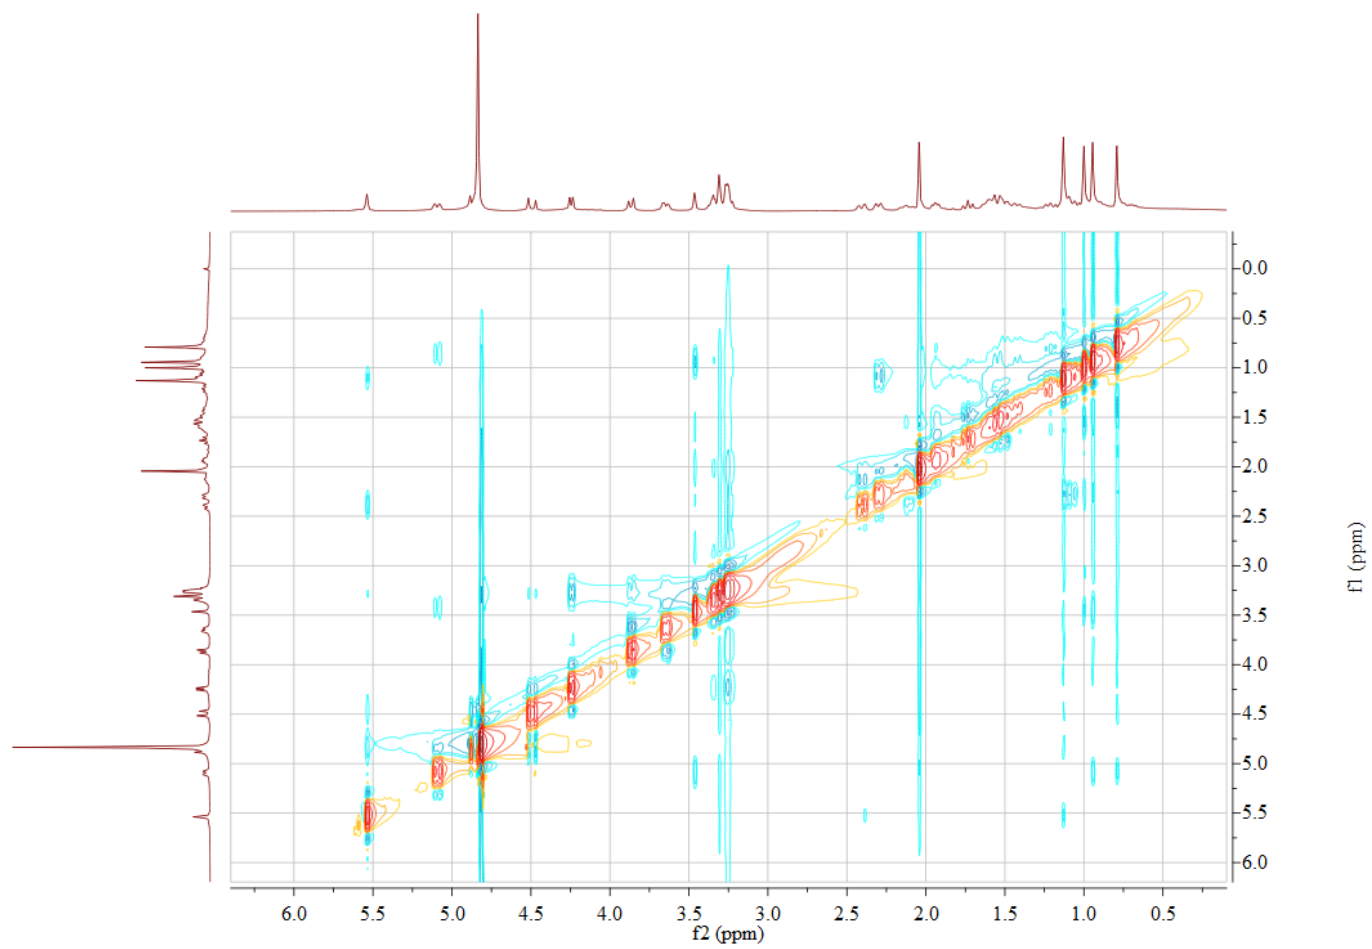

**S47**  $^1\text{H}$  NMR Spectrum of **9** in  $\text{CD}_3\text{OD}$

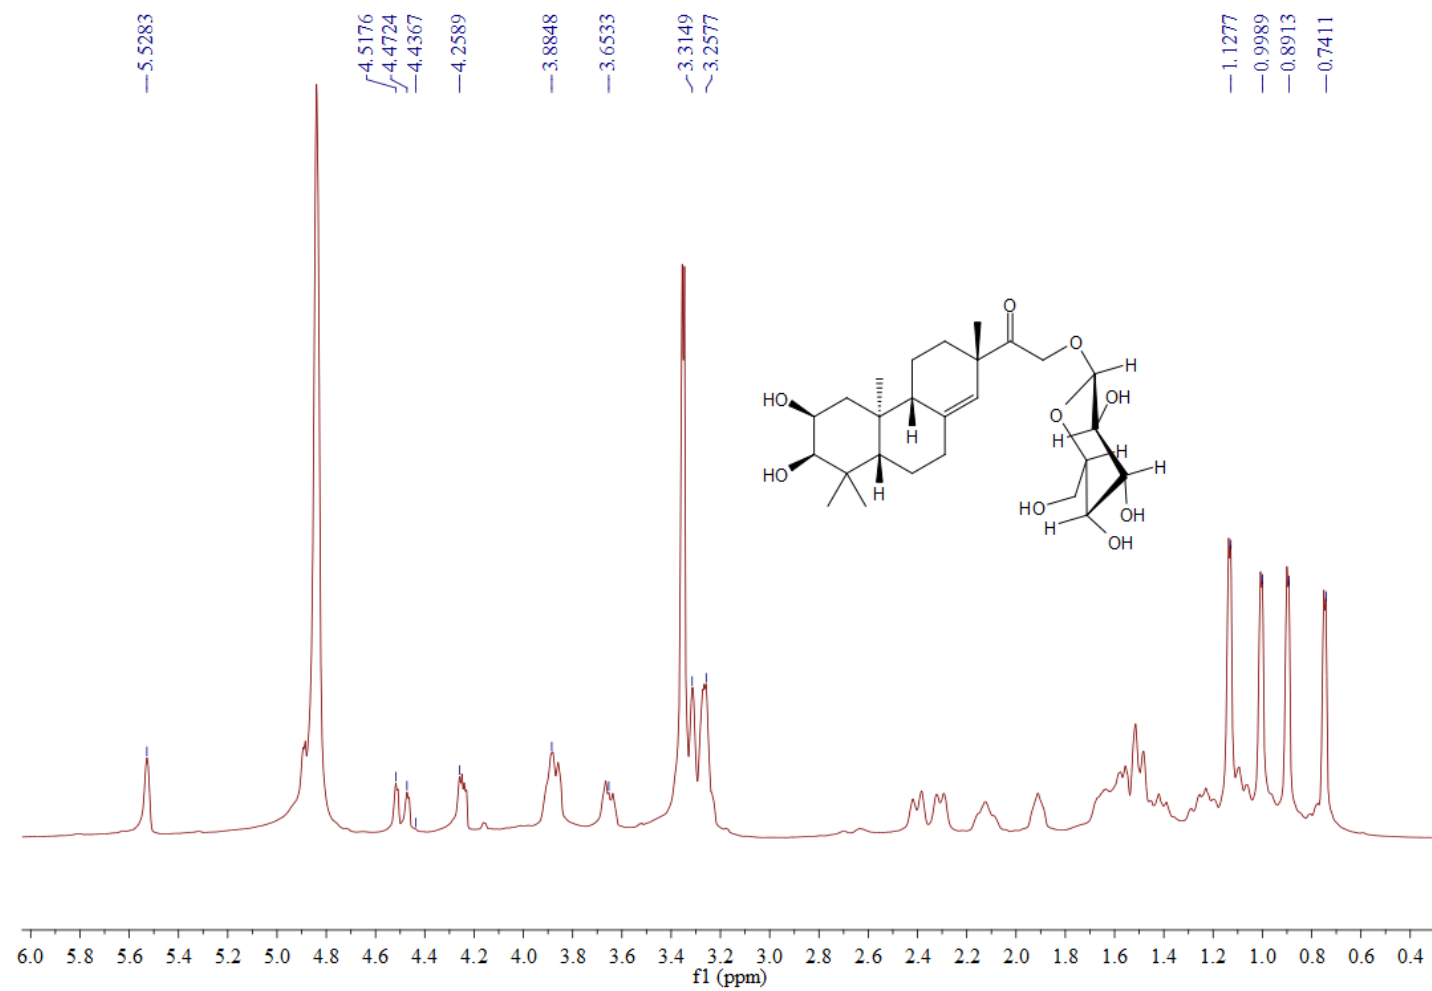

**S48**  $^{13}\text{C}$  NMR Spectrum of **9** in  $\text{CD}_3\text{OD}$

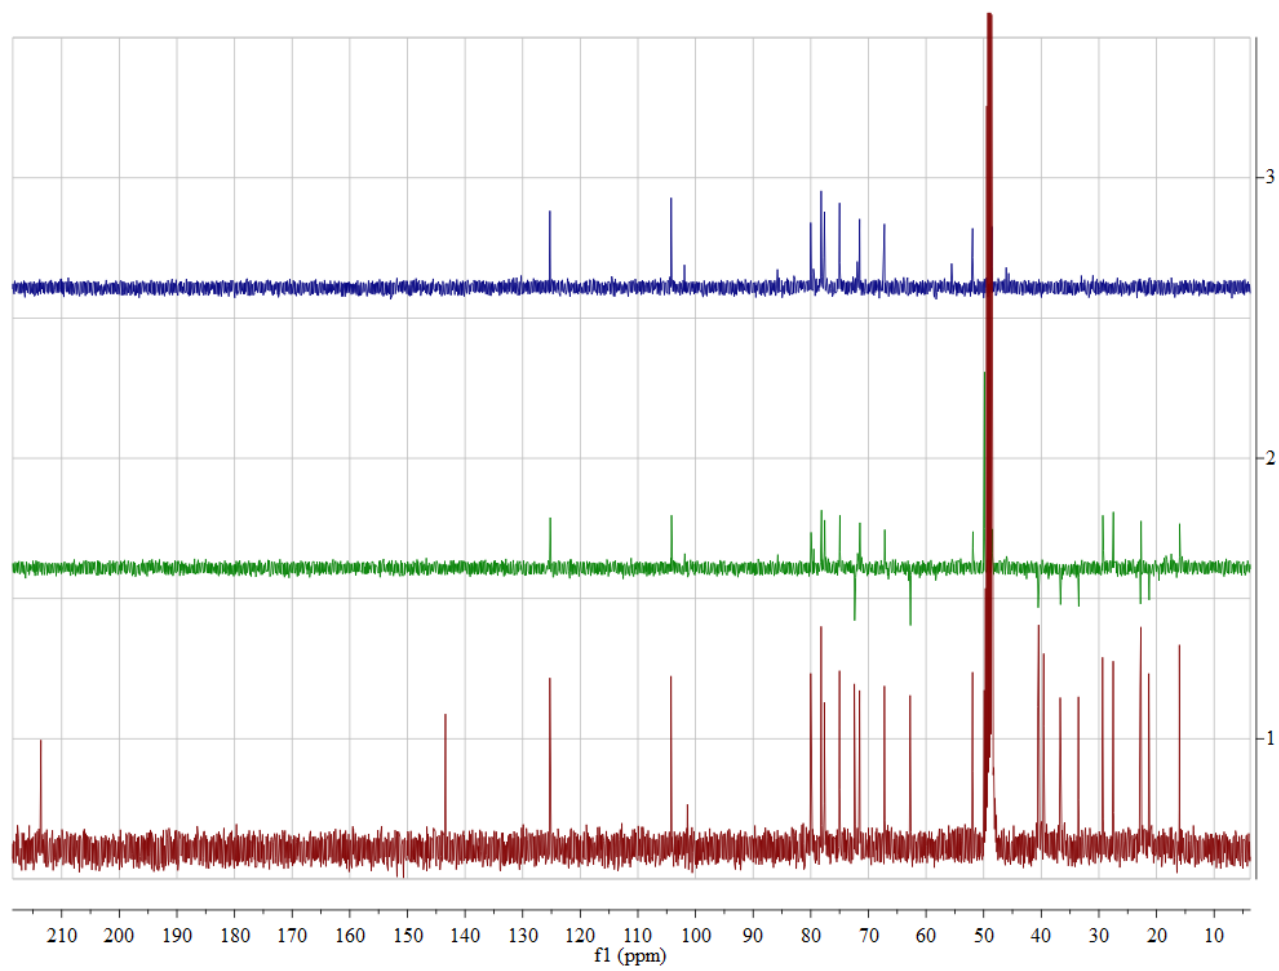

S49  $^1\text{H}$ - $^1\text{H}$  COSY Spectrum of **9** in  $\text{CD}_3\text{OD}$

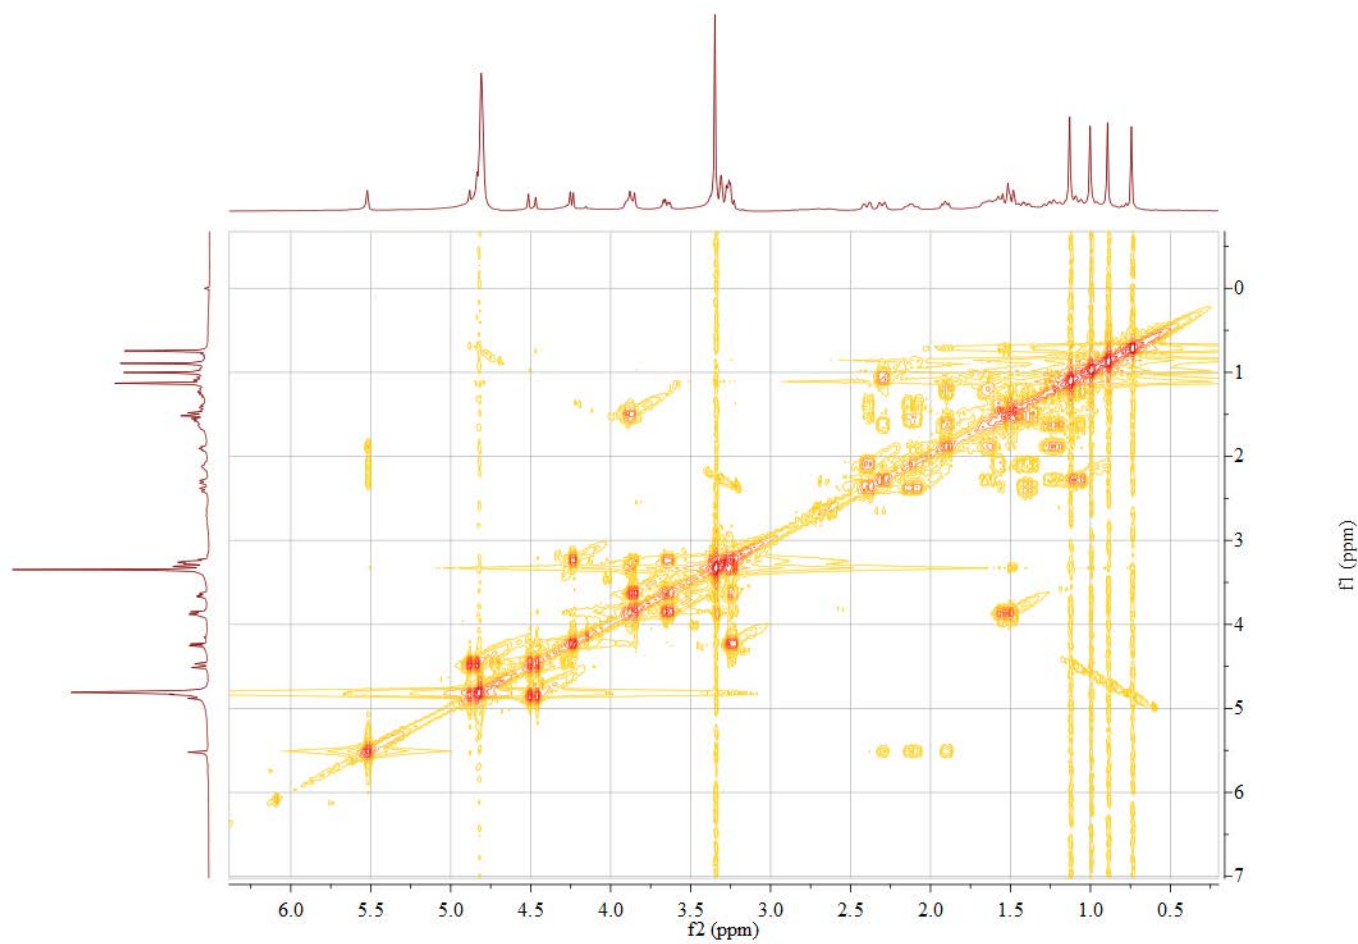

**S50** HSQC Spectrum of **9** in CD<sub>3</sub>OD

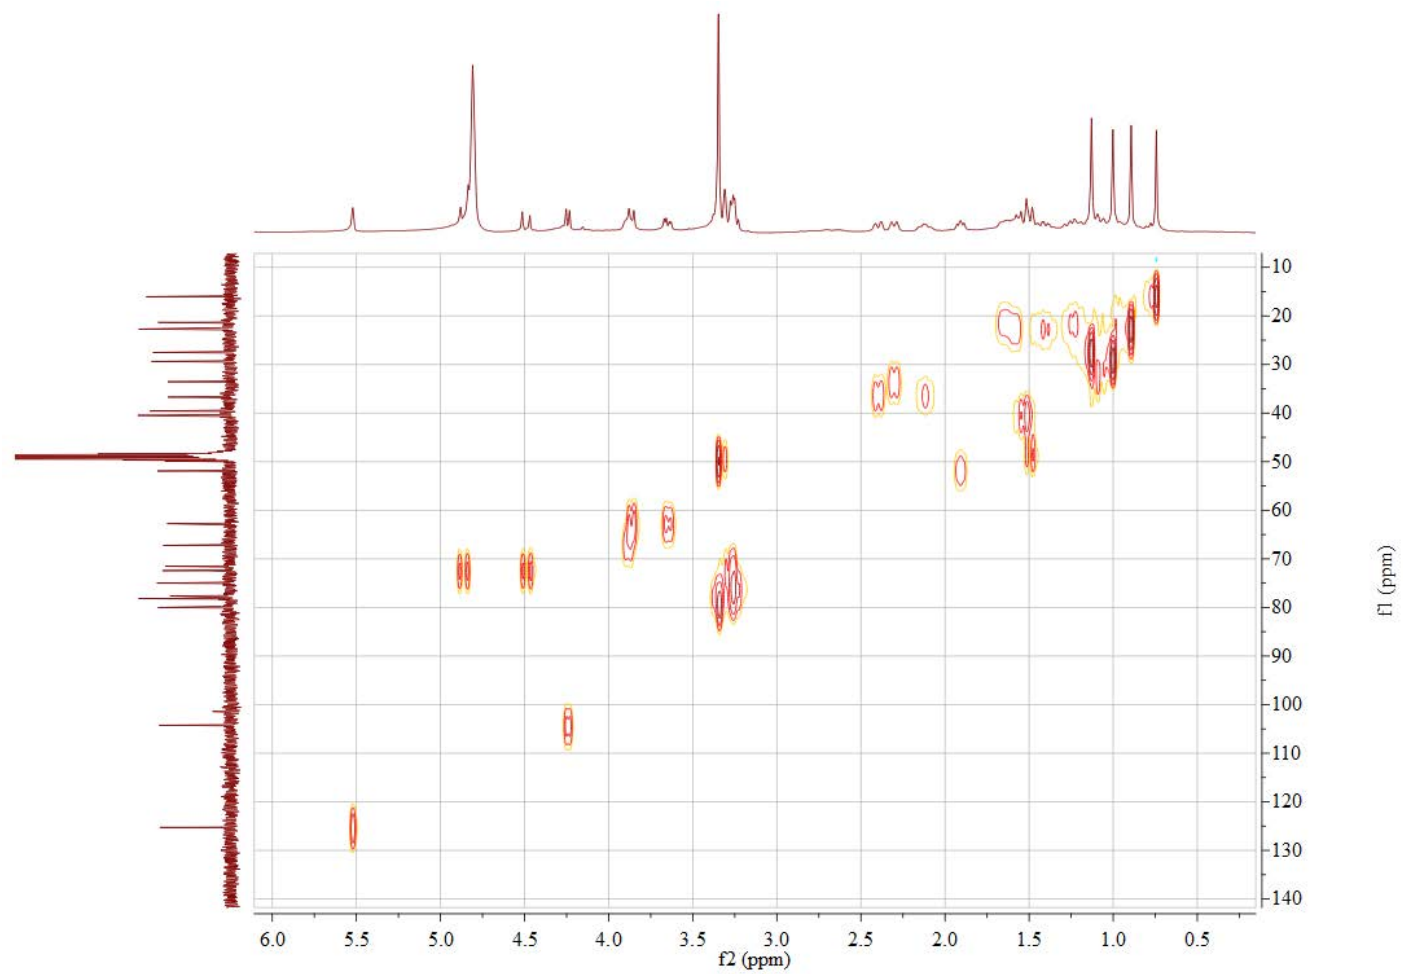

S51 HMBC Spectrum of **9** in CD<sub>3</sub>OD

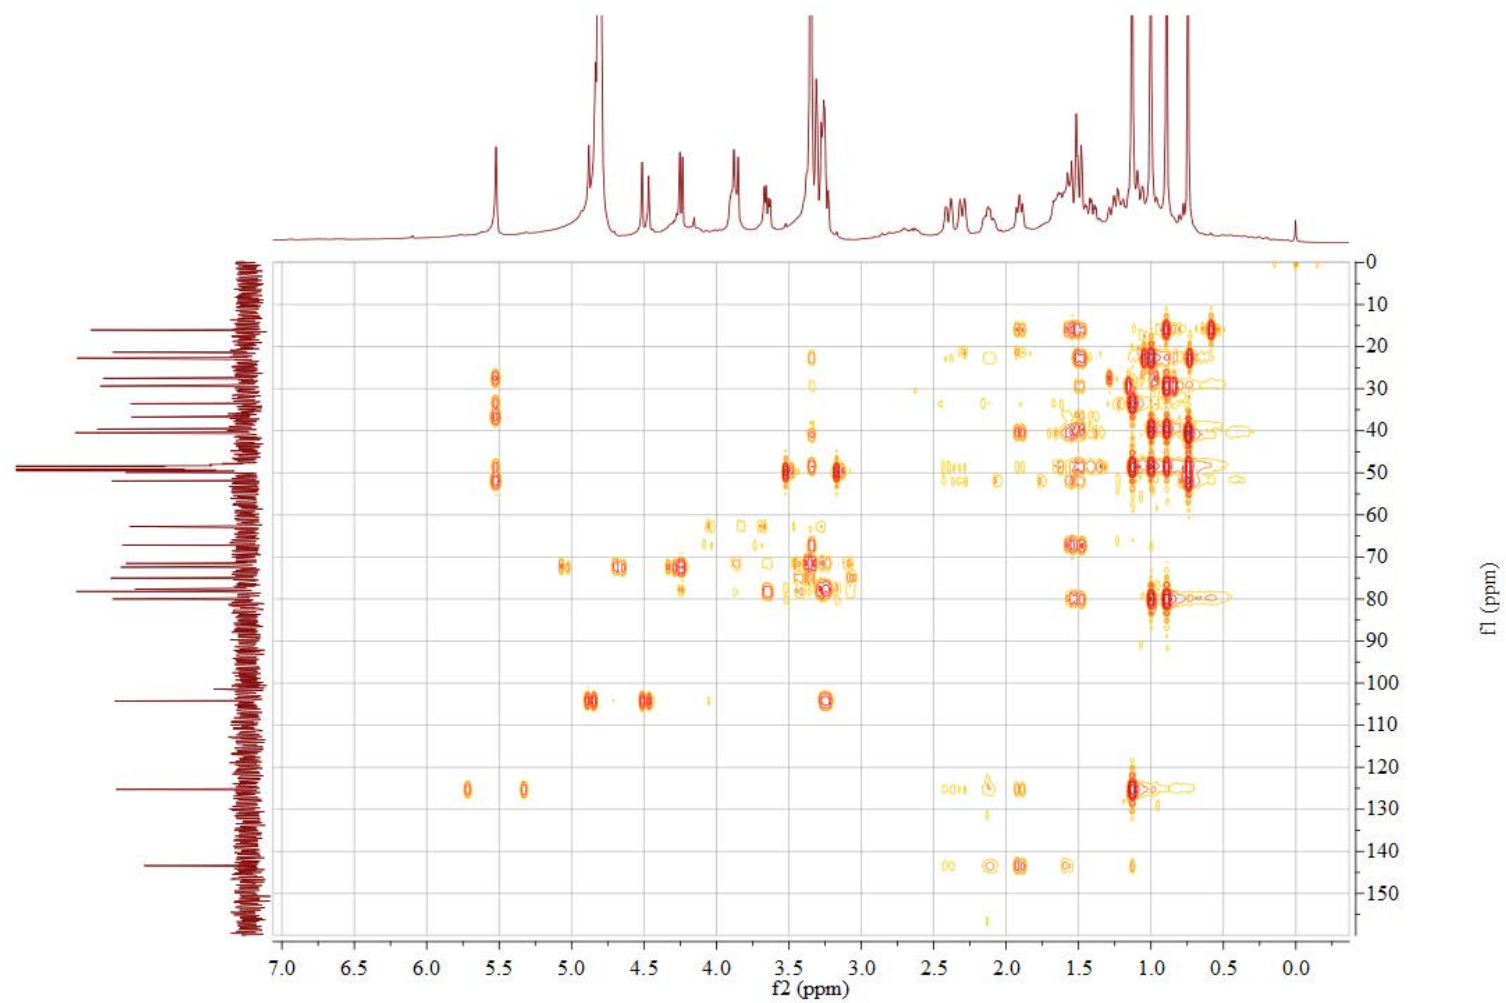

S52 NOESY Spectrum of **9** in CD<sub>3</sub>OD

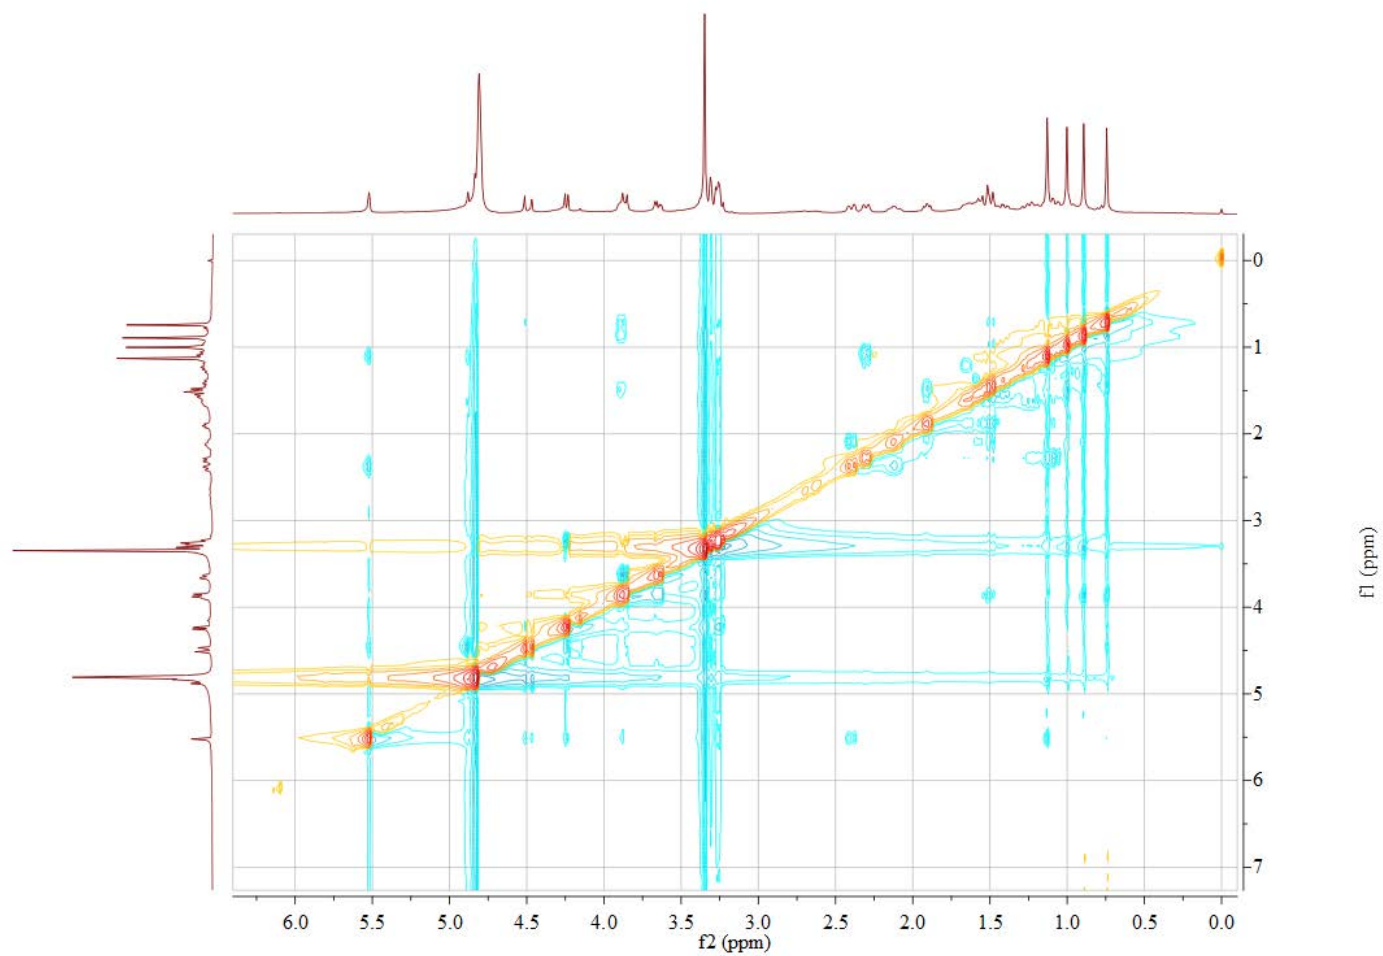



S53  $^1\text{H}$  NMR Spectrum of **10** in  $\text{CD}_3\text{OD}$

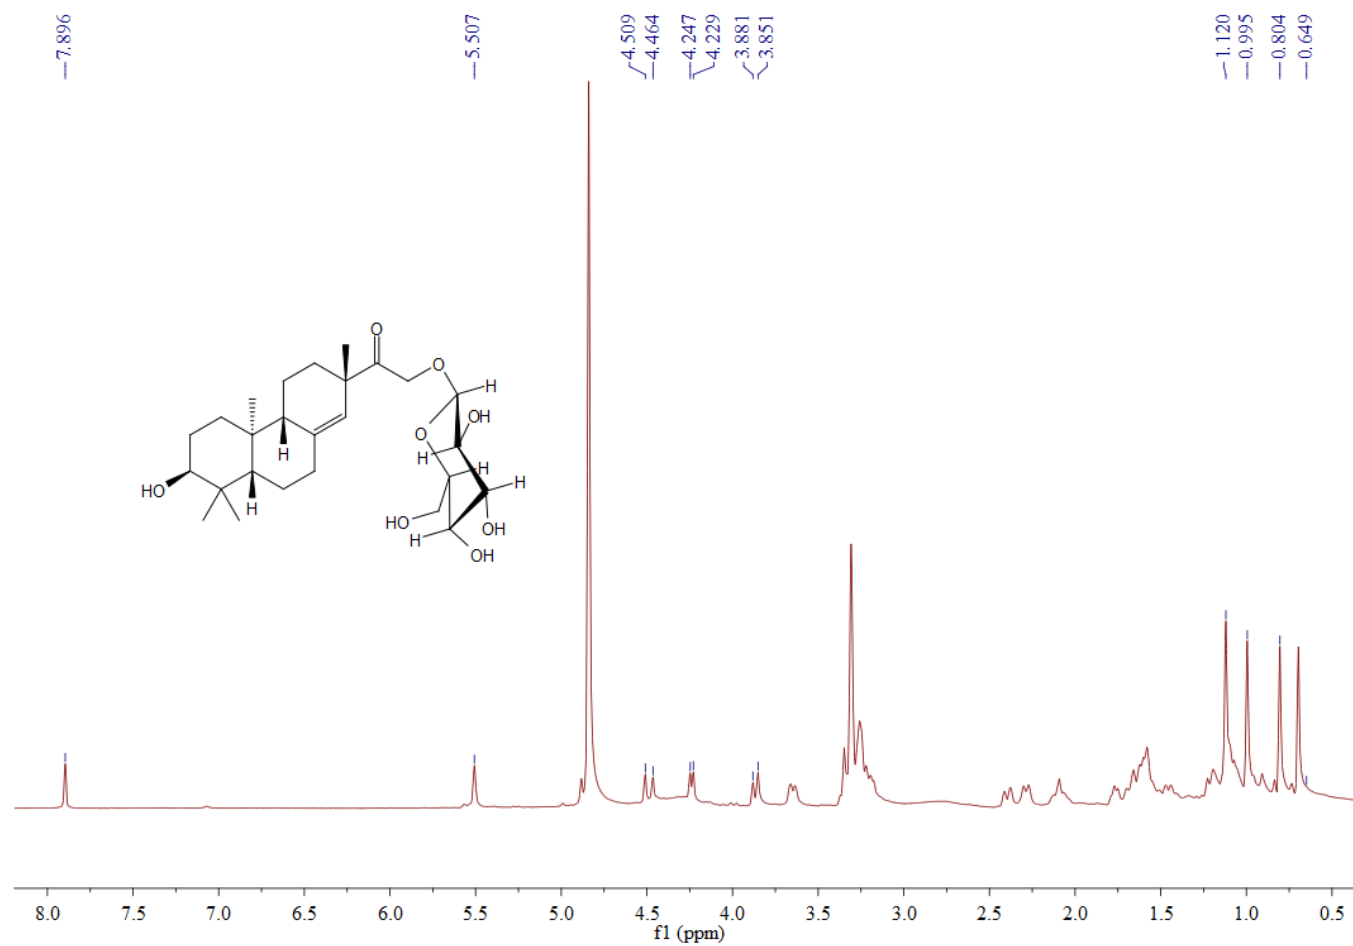

S54  $^{13}\text{C}$  NMR Spectrum of **10** in  $\text{CD}_3\text{OD}$

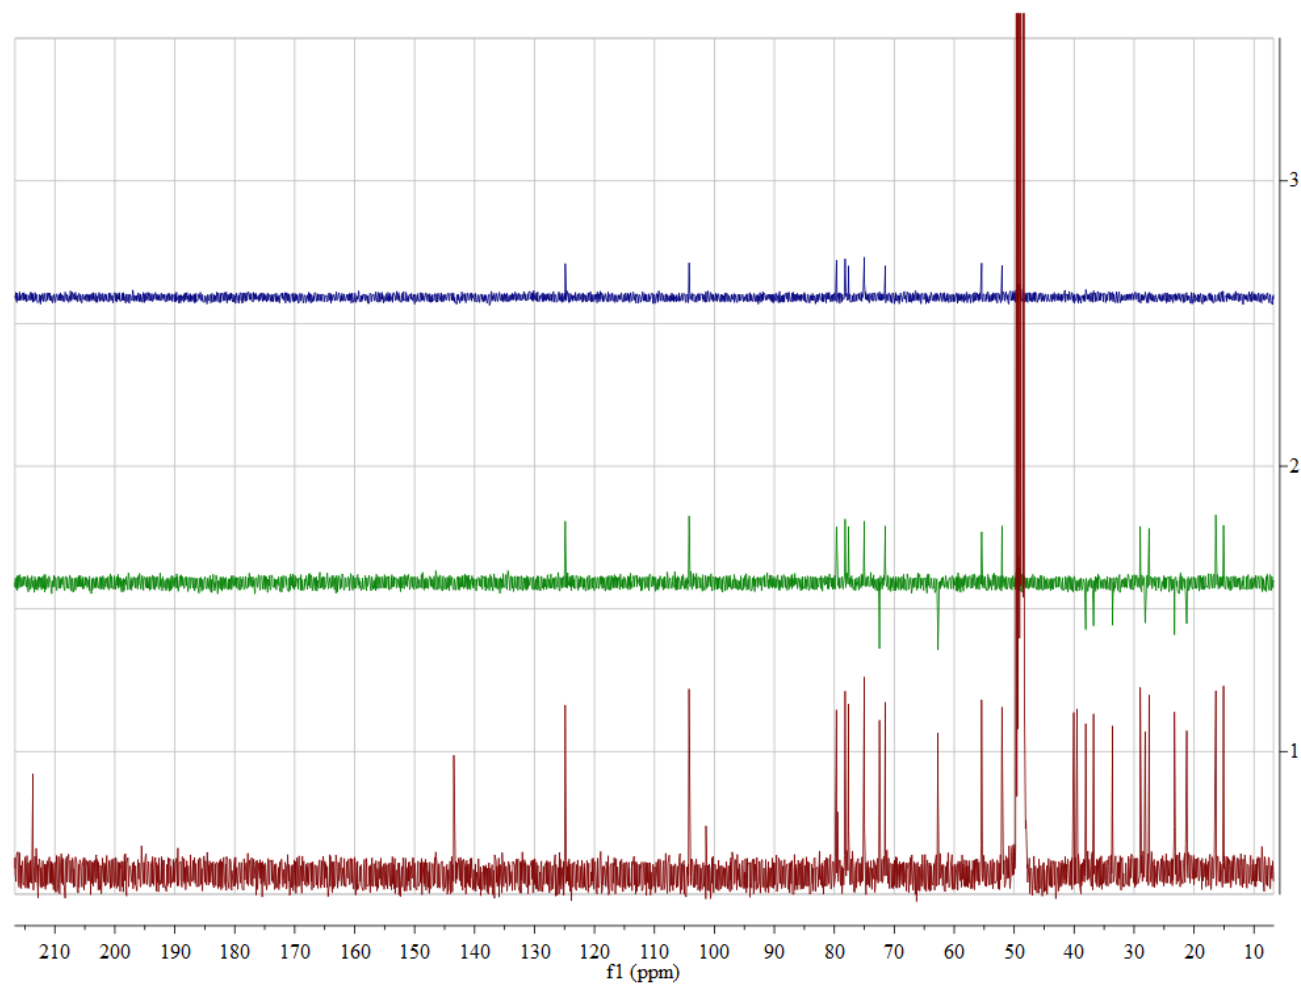

S55  $^1\text{H}$ - $^1\text{H}$  COSY Spectrum of **10** in  $\text{CD}_3\text{OD}$

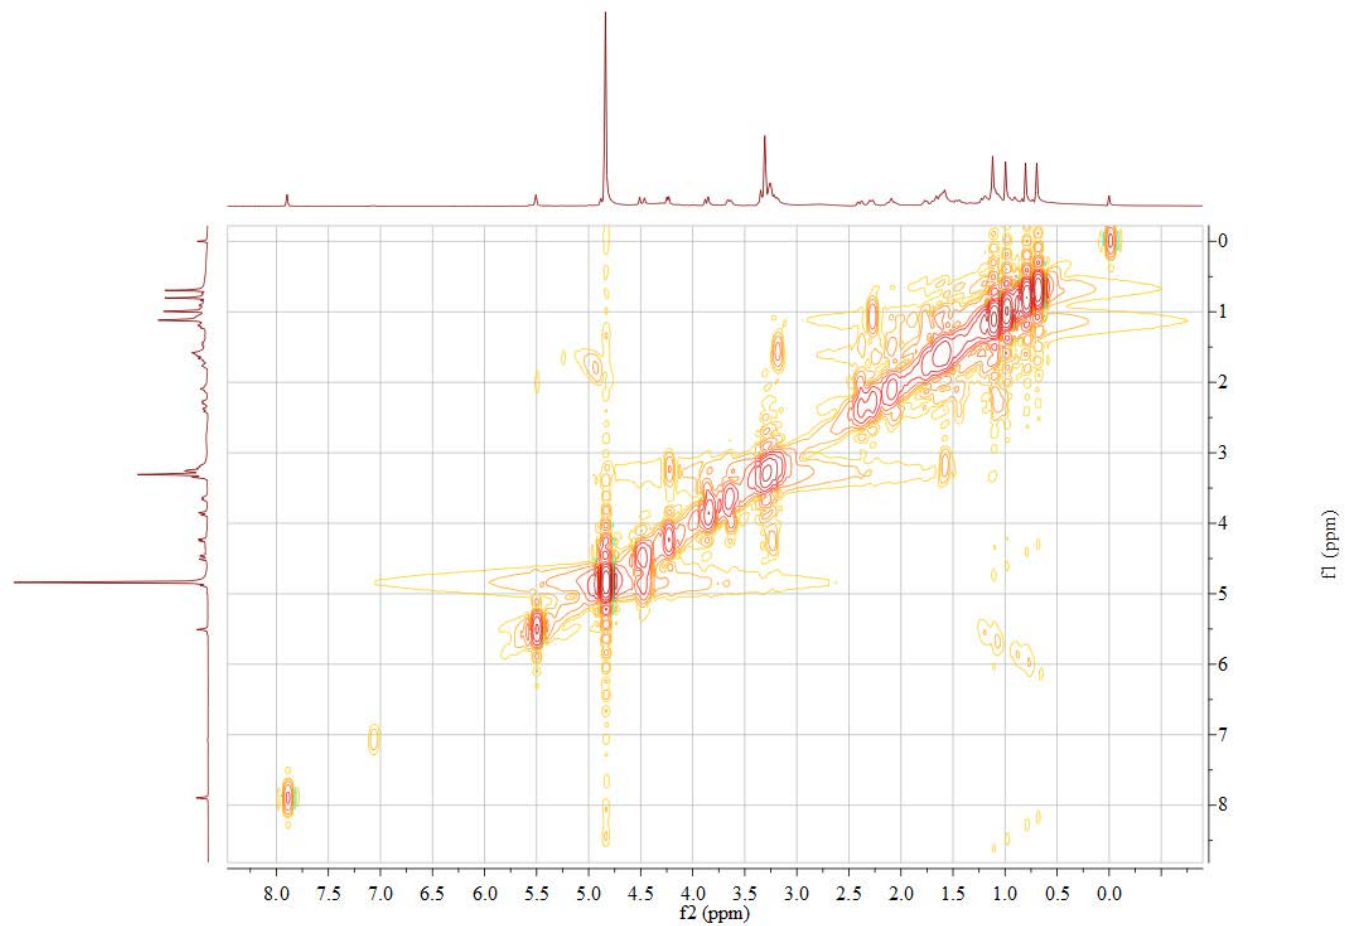

S56 HSQC Spectrum of **10** in CD<sub>3</sub>OD

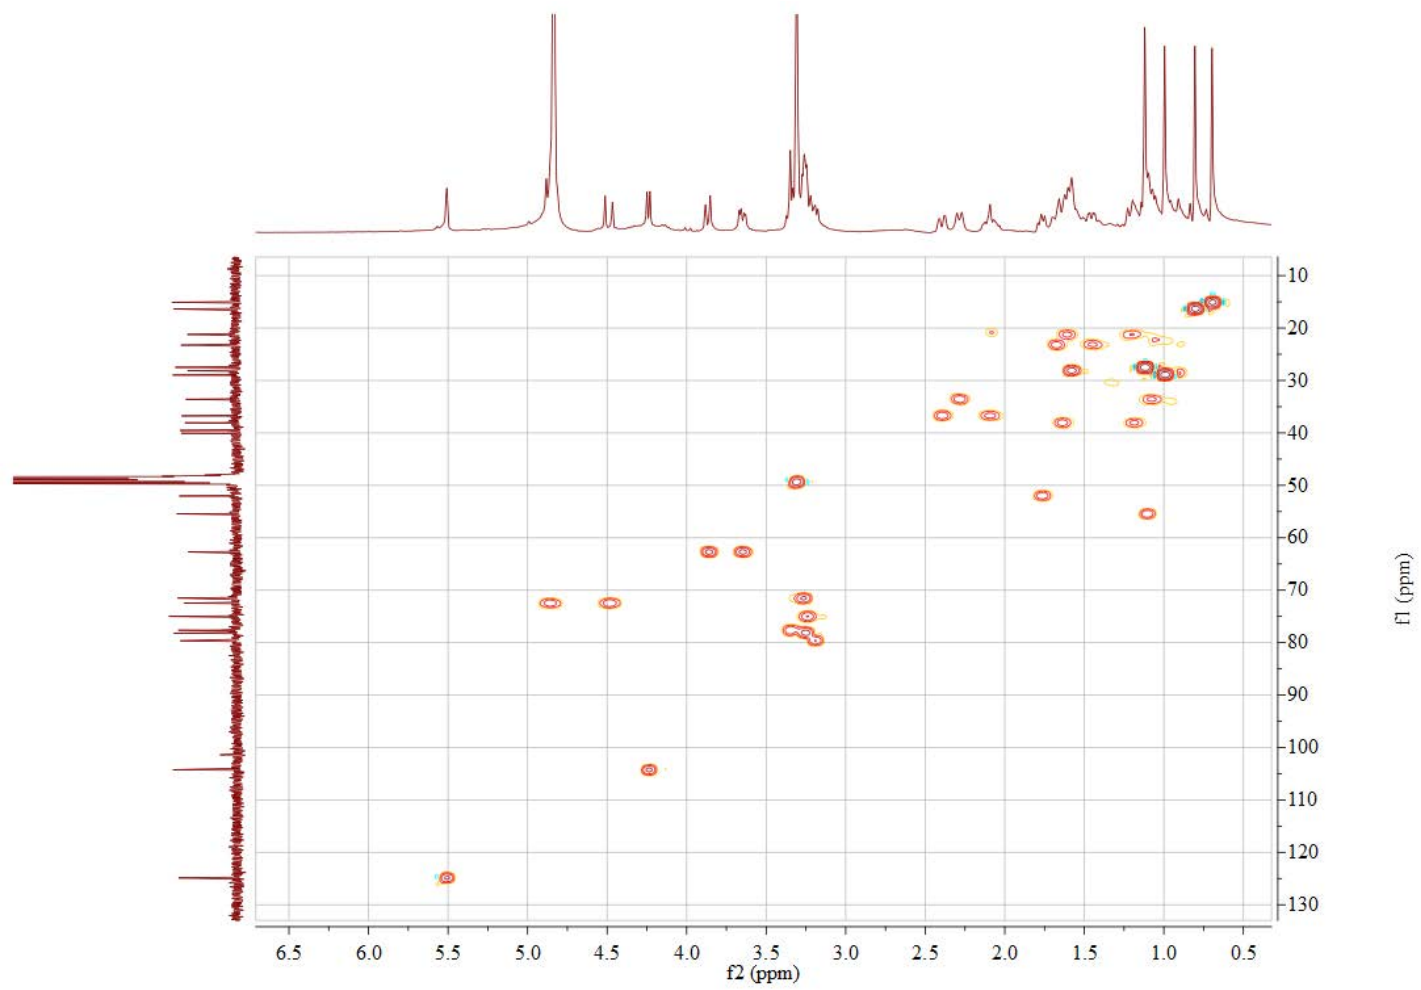

S57 HMBC Spectrum of **10** in CD<sub>3</sub>OD

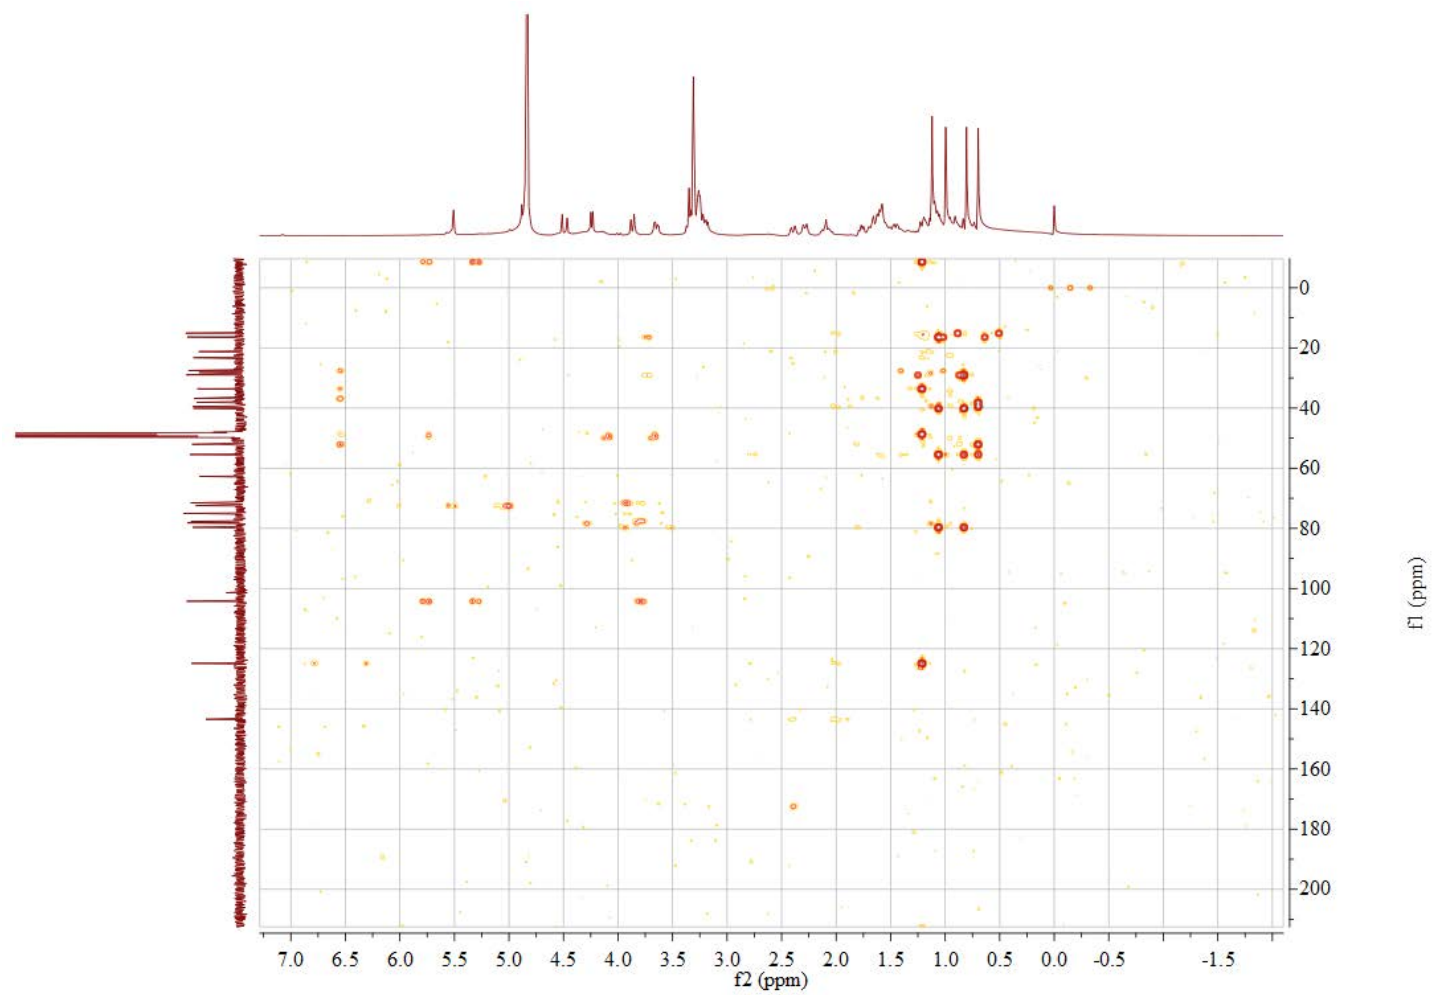

**S58** NOESY Spectrum of **10** in CD<sub>3</sub>OD

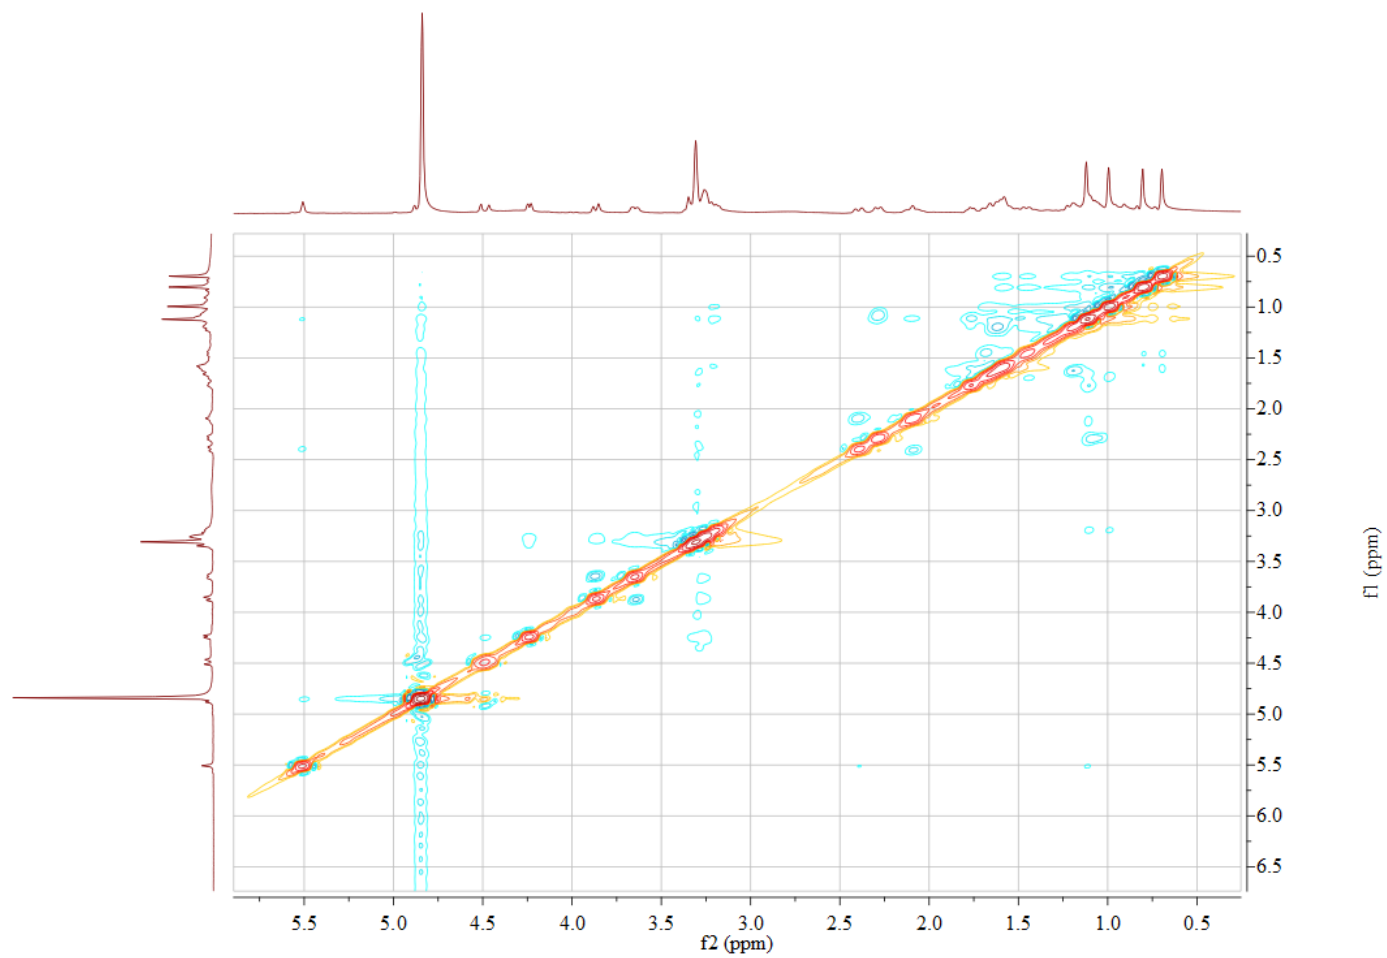

**S59**  $^1\text{H}$  NMR Spectrum of **11** in  $\text{CD}_3\text{OD}$

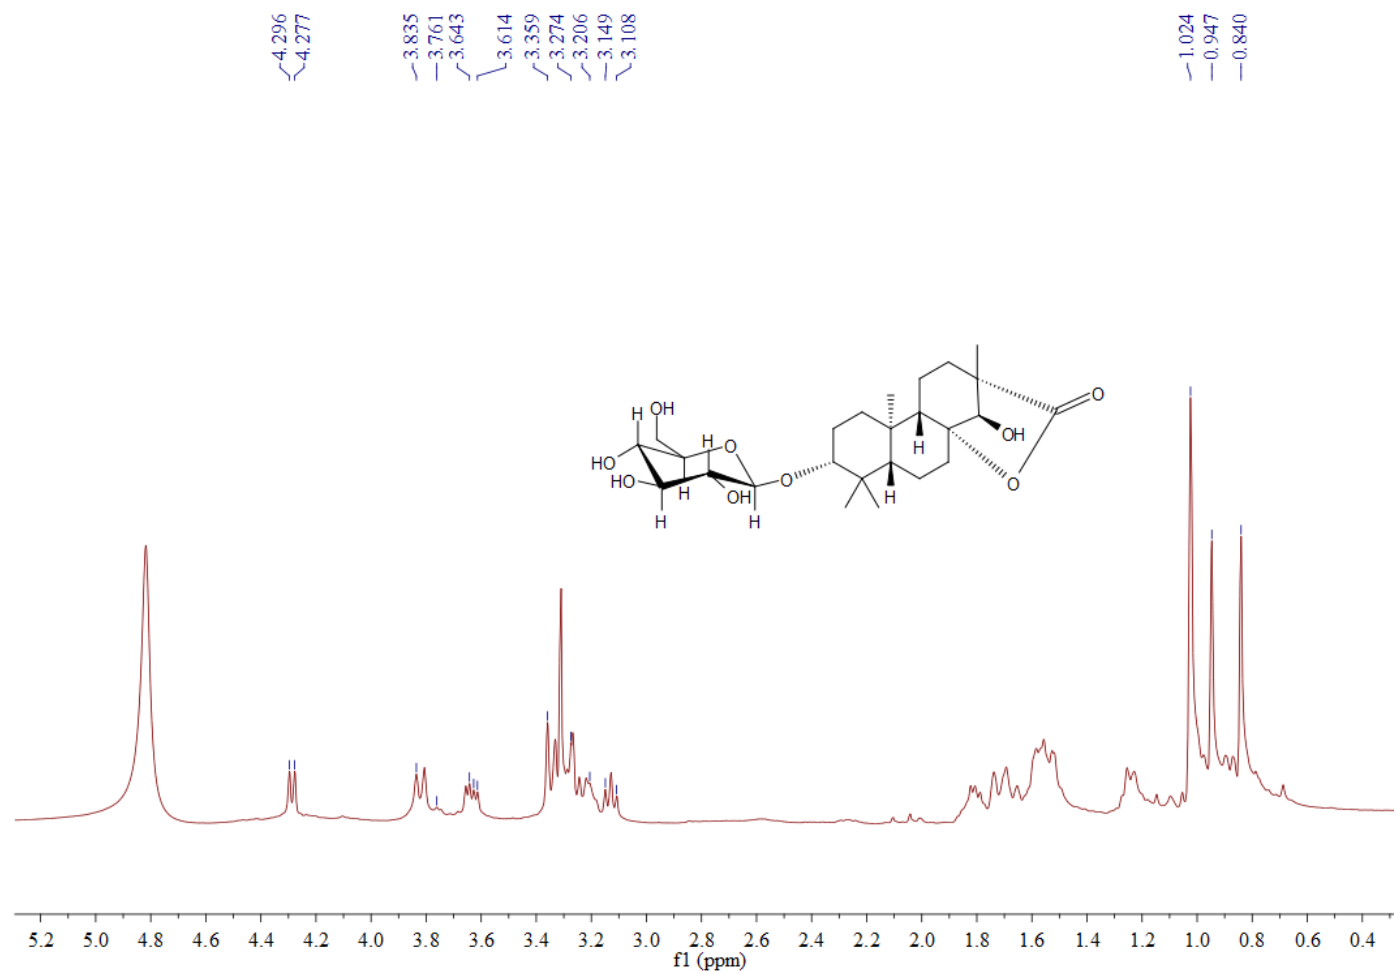

**S60**  $^{13}\text{C}$  NMR Spectrum of **11** in  $\text{CD}_3\text{OD}$

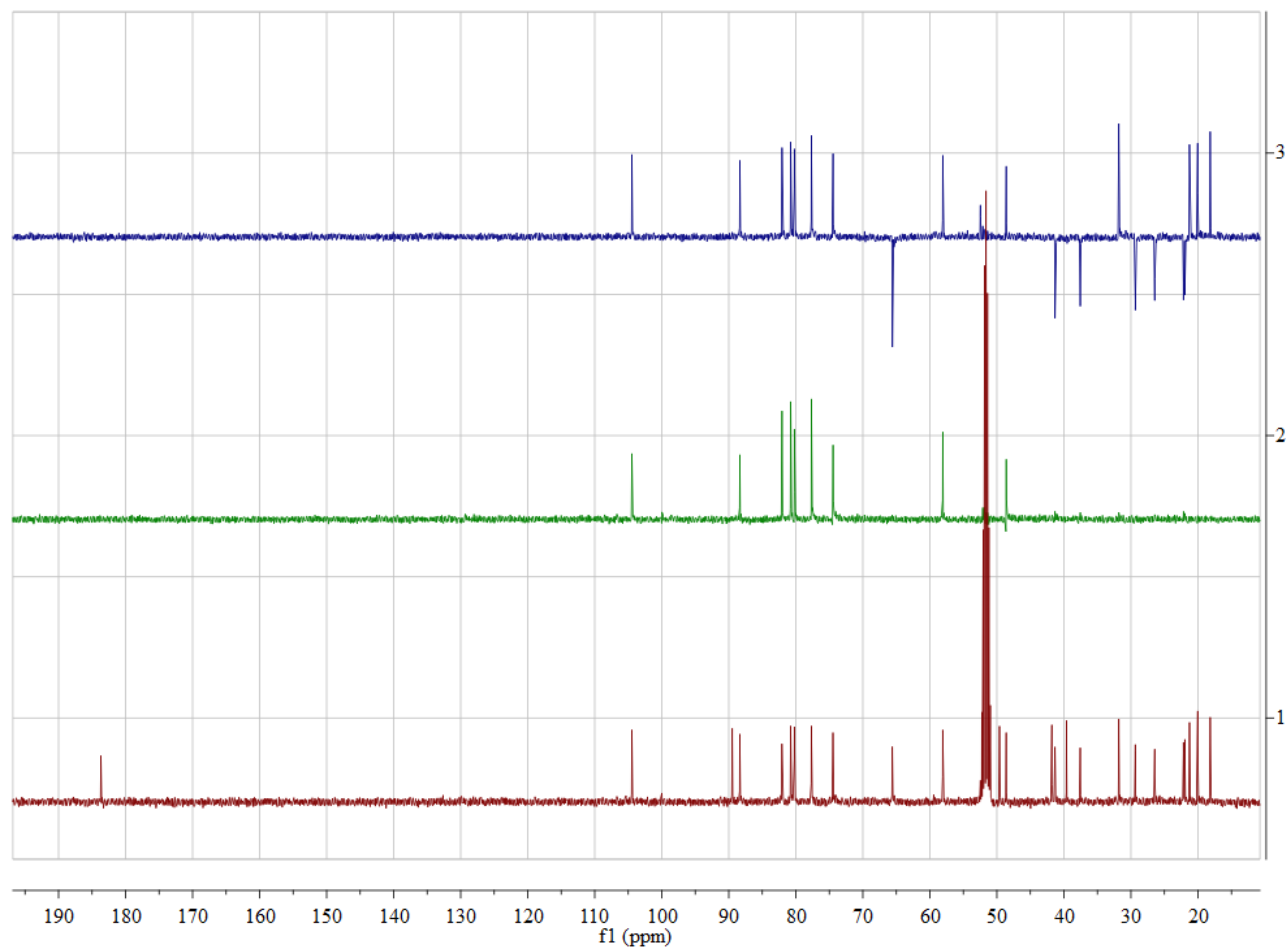



**S61**  $^1\text{H}$ - $^1\text{H}$  COSY Spectrum of **11** in  $\text{CD}_3\text{OD}$

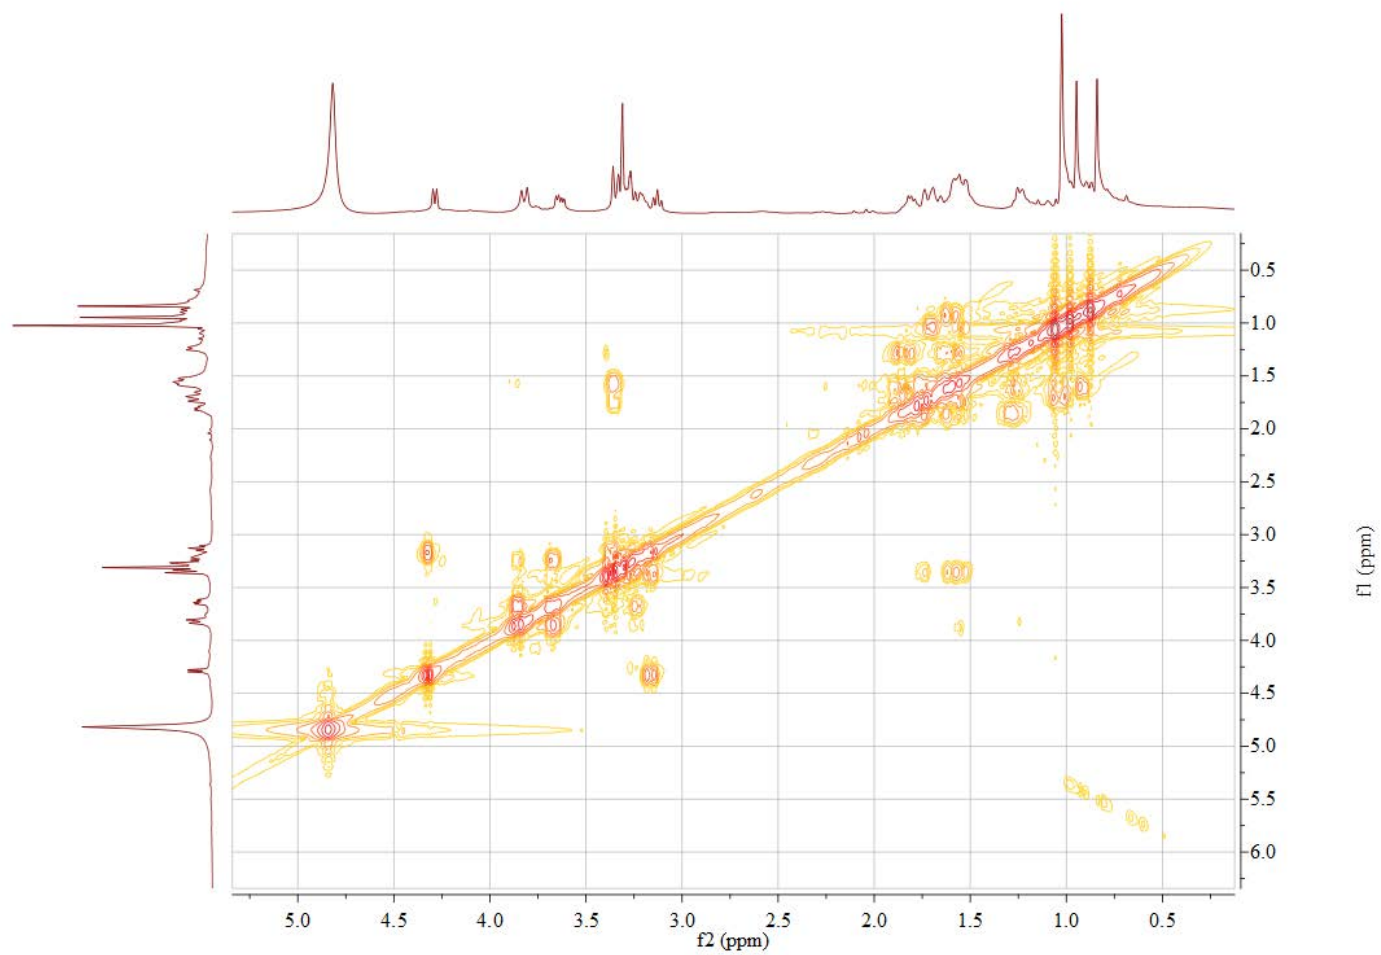

**S62** HSQC Spectrum of **11** in CD<sub>3</sub>OD

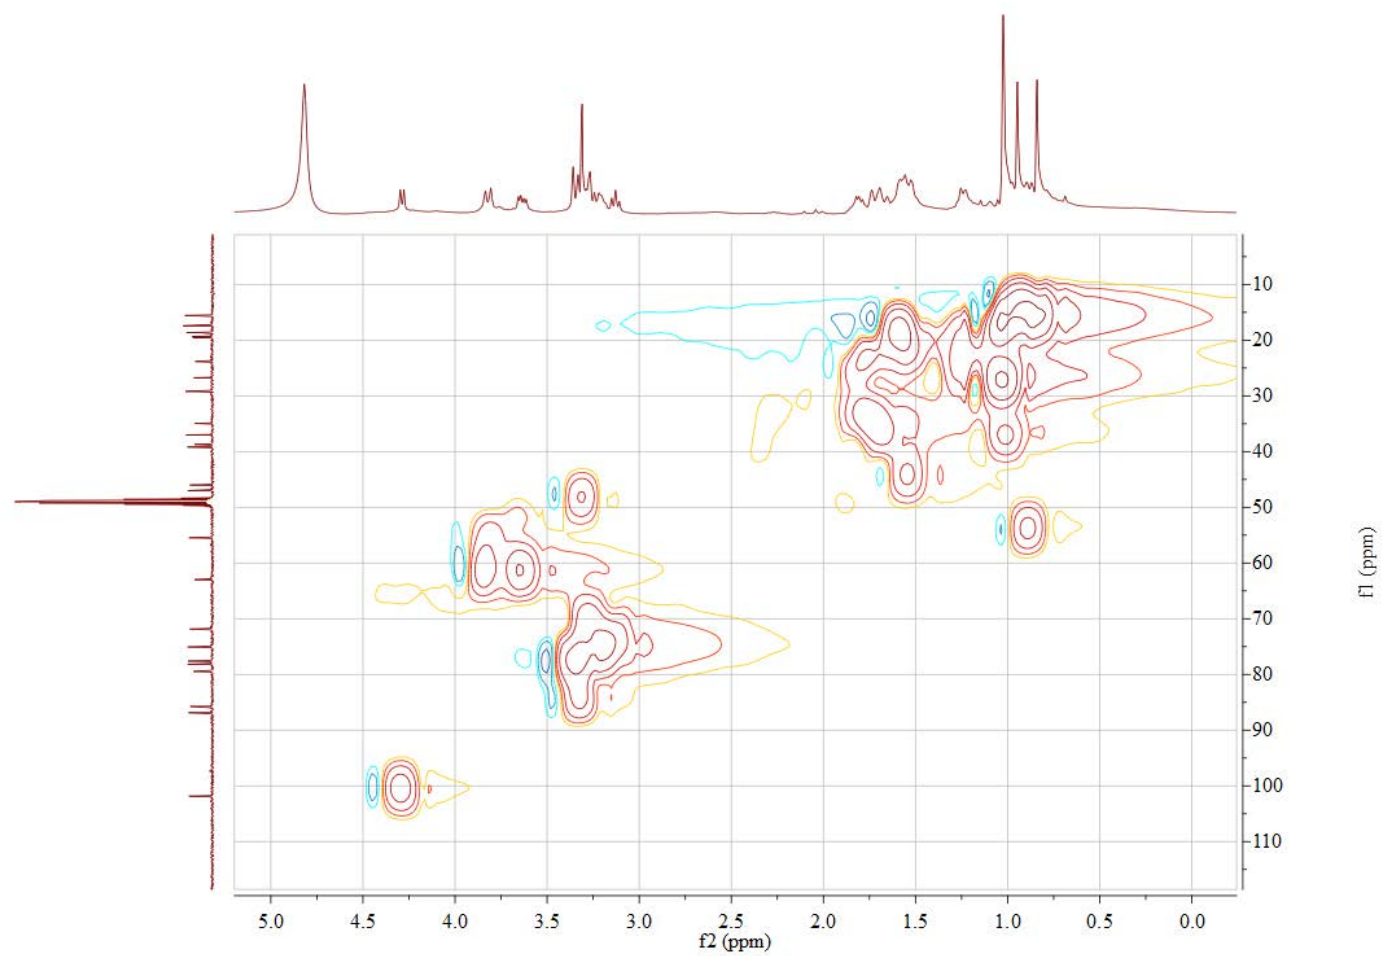

**S63**     HMBC Spectrum of **11** in CD<sub>3</sub>OD

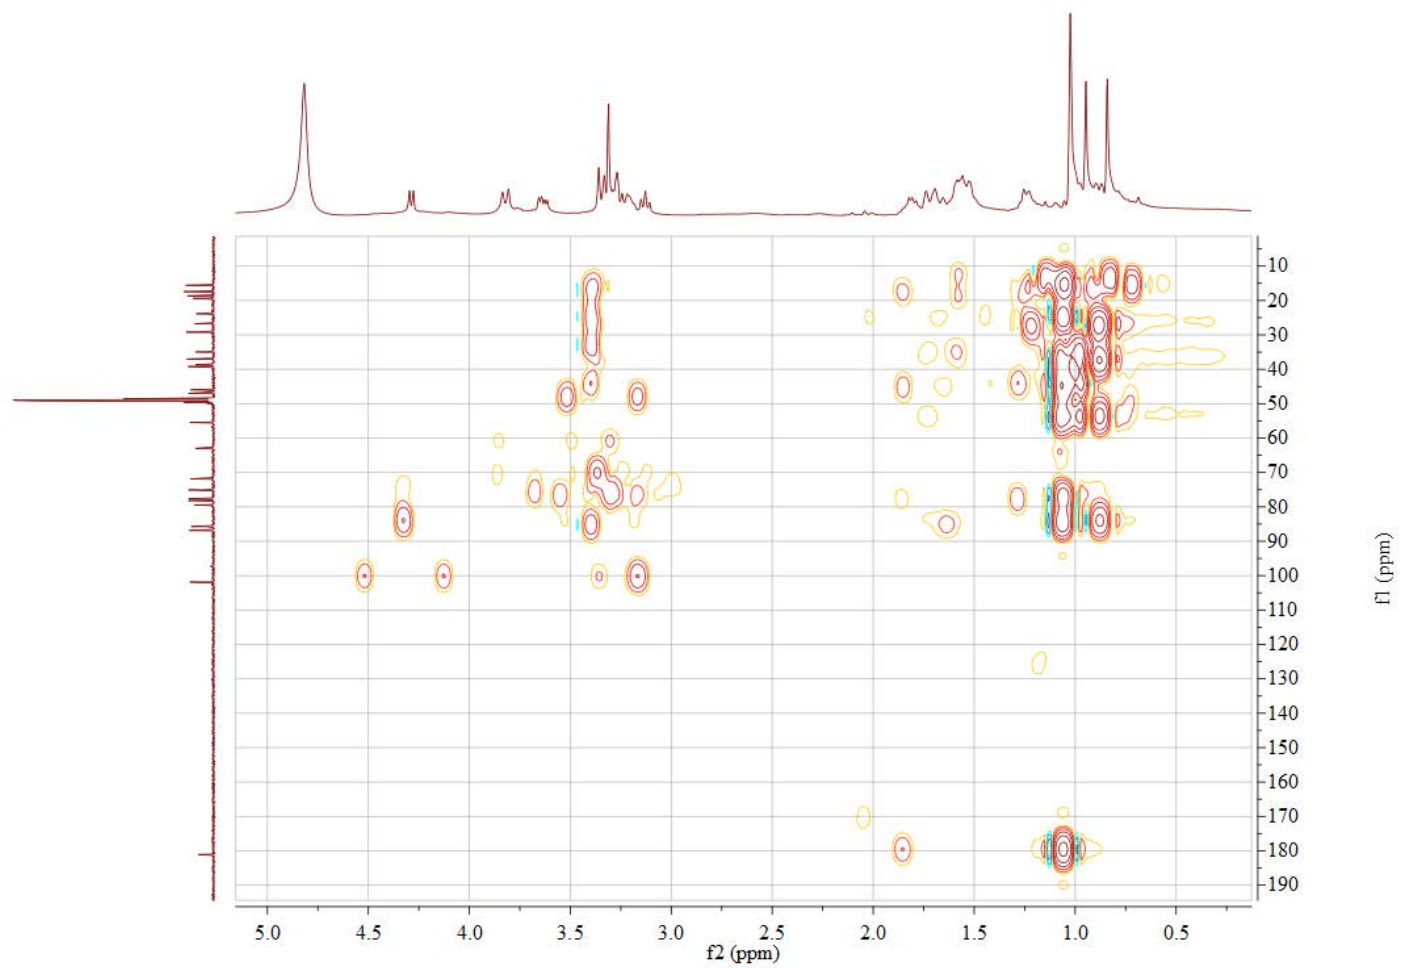

**S64** NOESY Spectrum of **11** in CD<sub>3</sub>OD

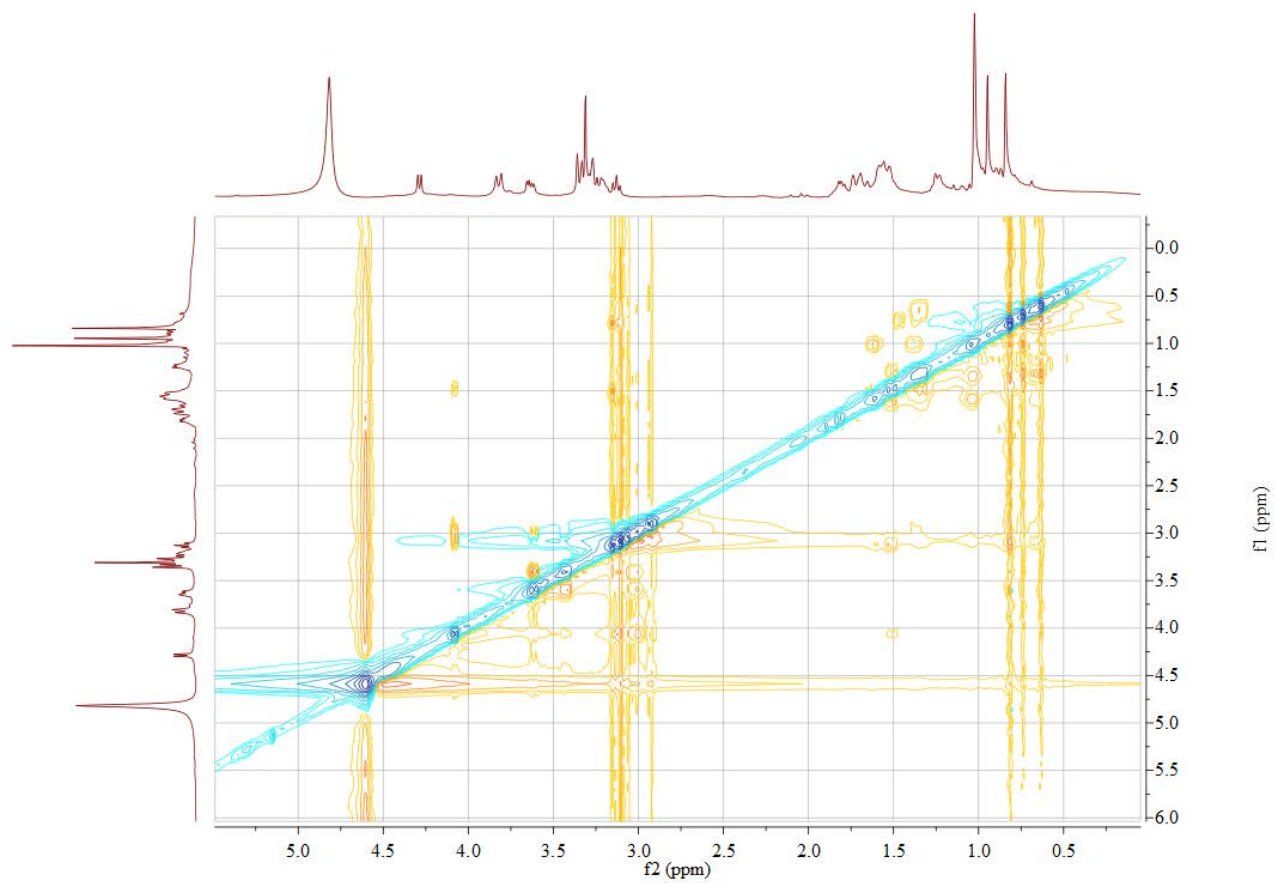

**S65**  $^1\text{H}$  NMR Spectrum of **12** in  $\text{CD}_3\text{OD}$

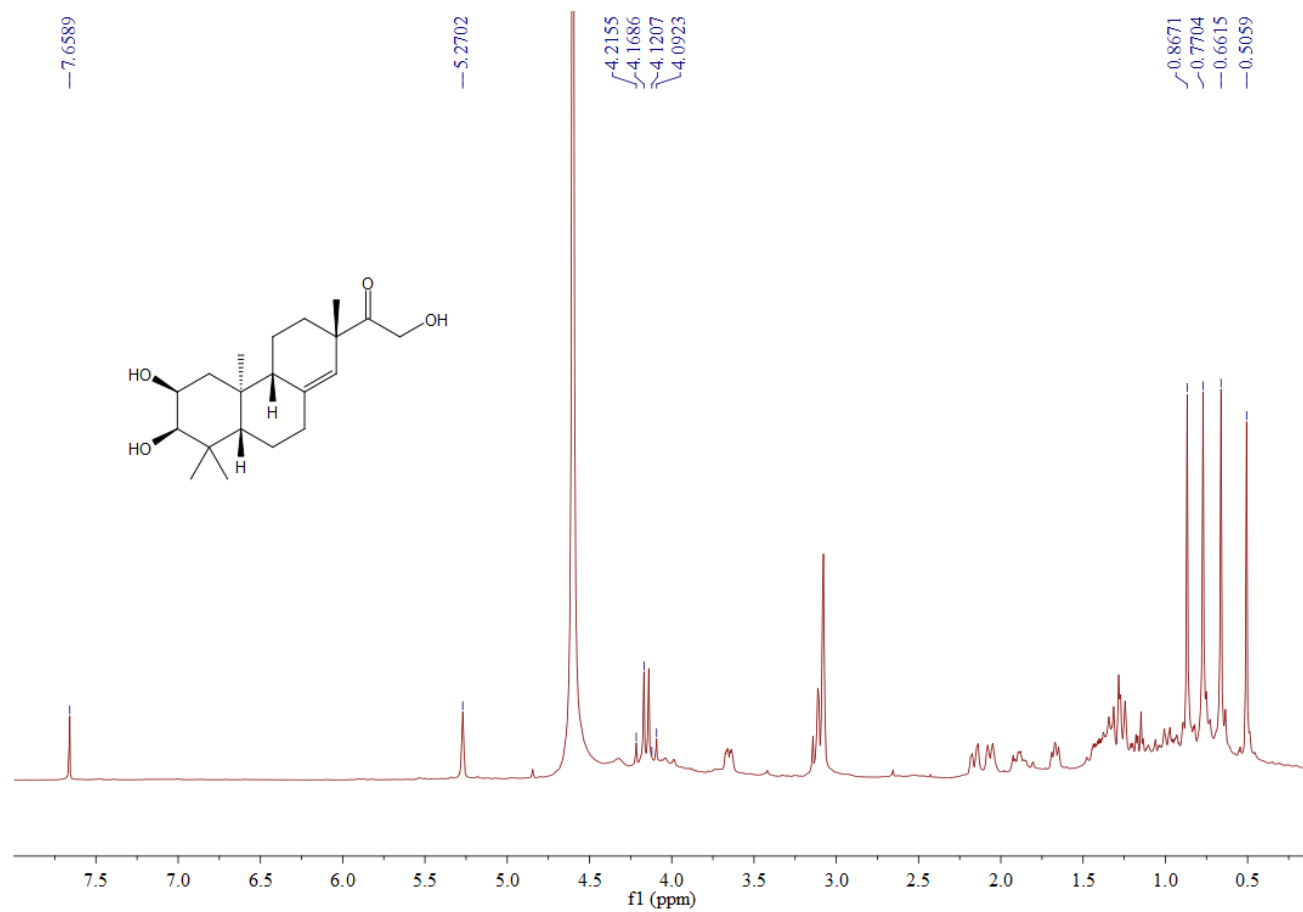

**S66**  $^{13}\text{C}$  NMR Spectrum of **12** in  $\text{CD}_3\text{OD}$

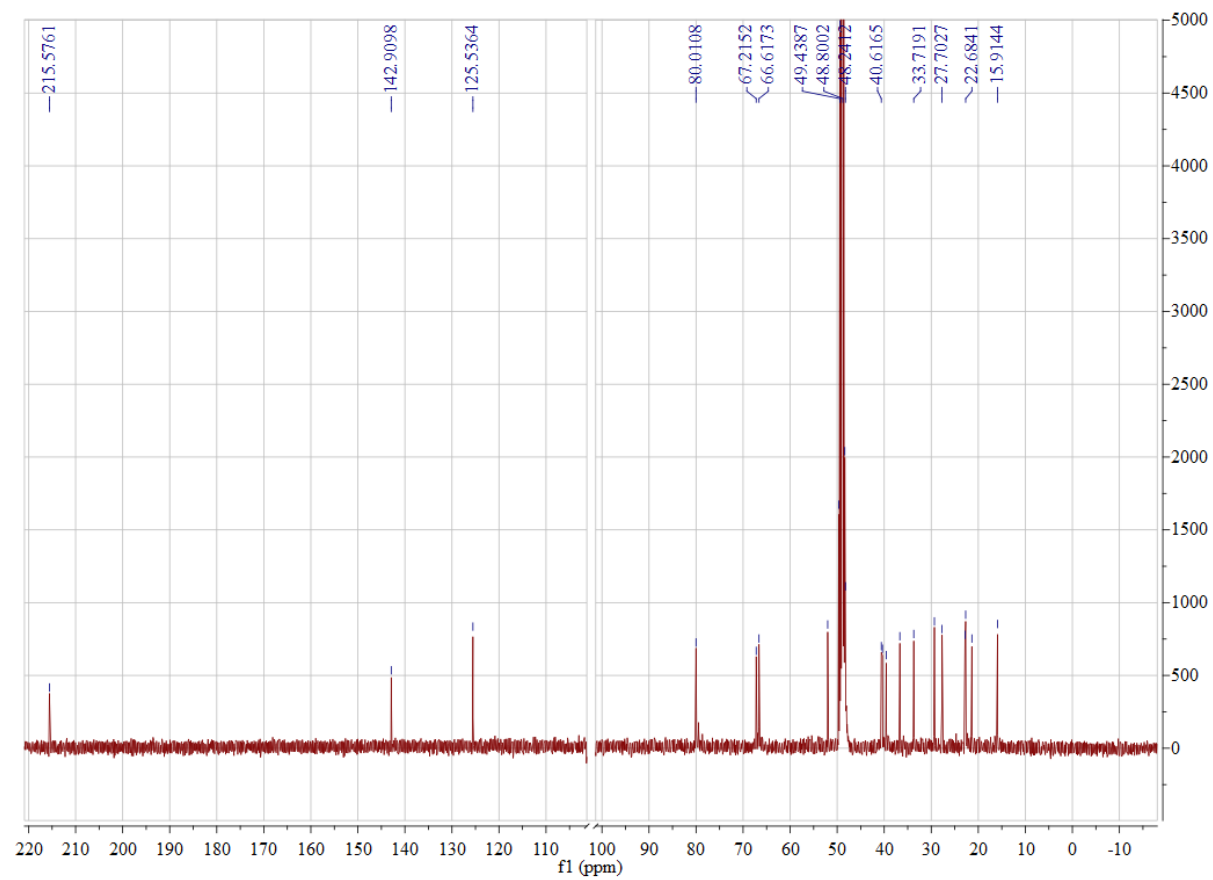

**S67**  $^1\text{H}$  NMR Spectrum of **2a** in  $\text{CDCl}_3$

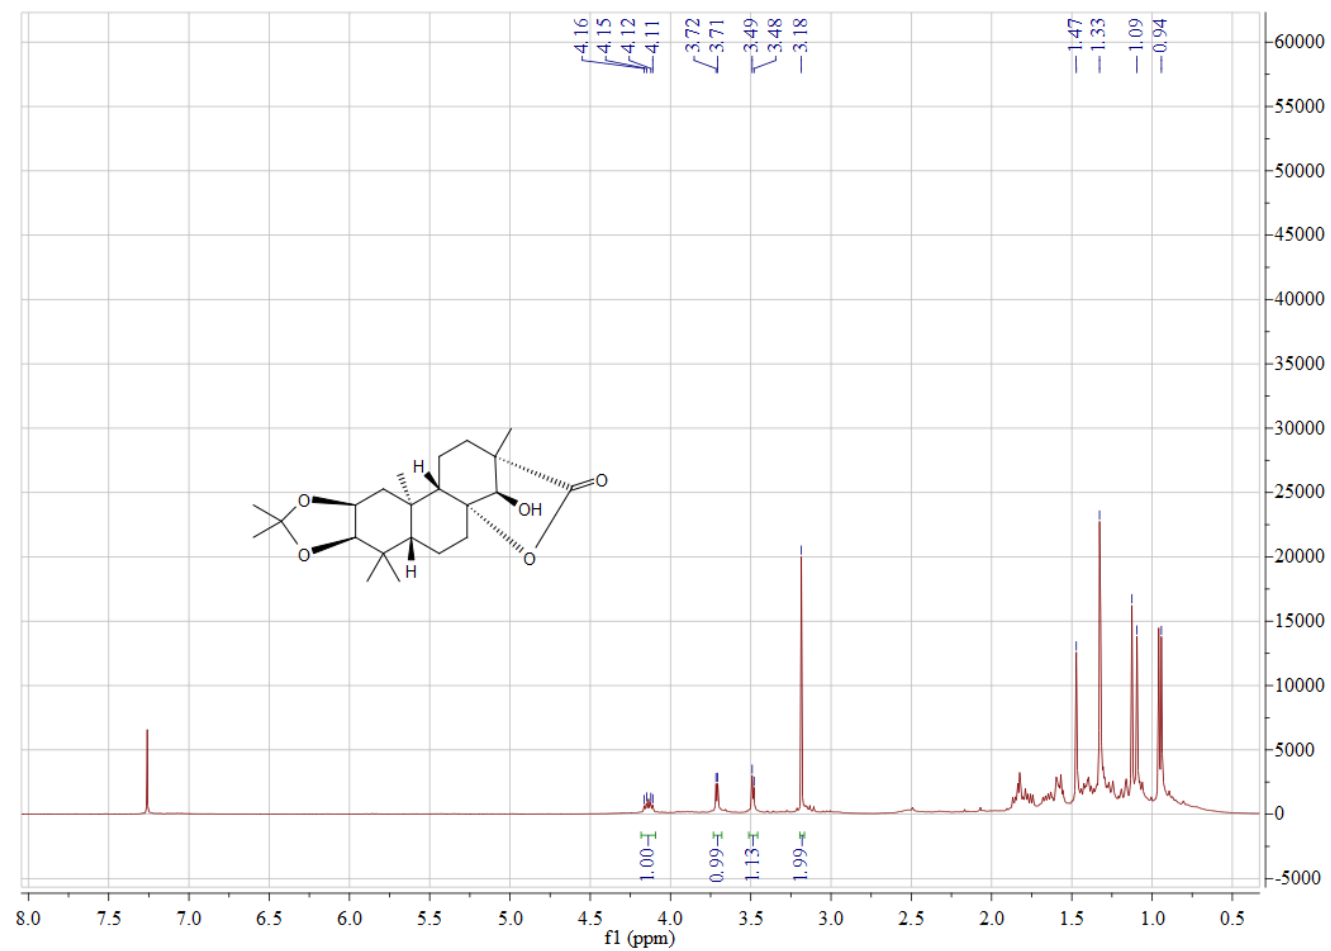

**S68**  $^{13}\text{C}$  NMR Spectrum of **2a** in  $\text{CDCl}_3$

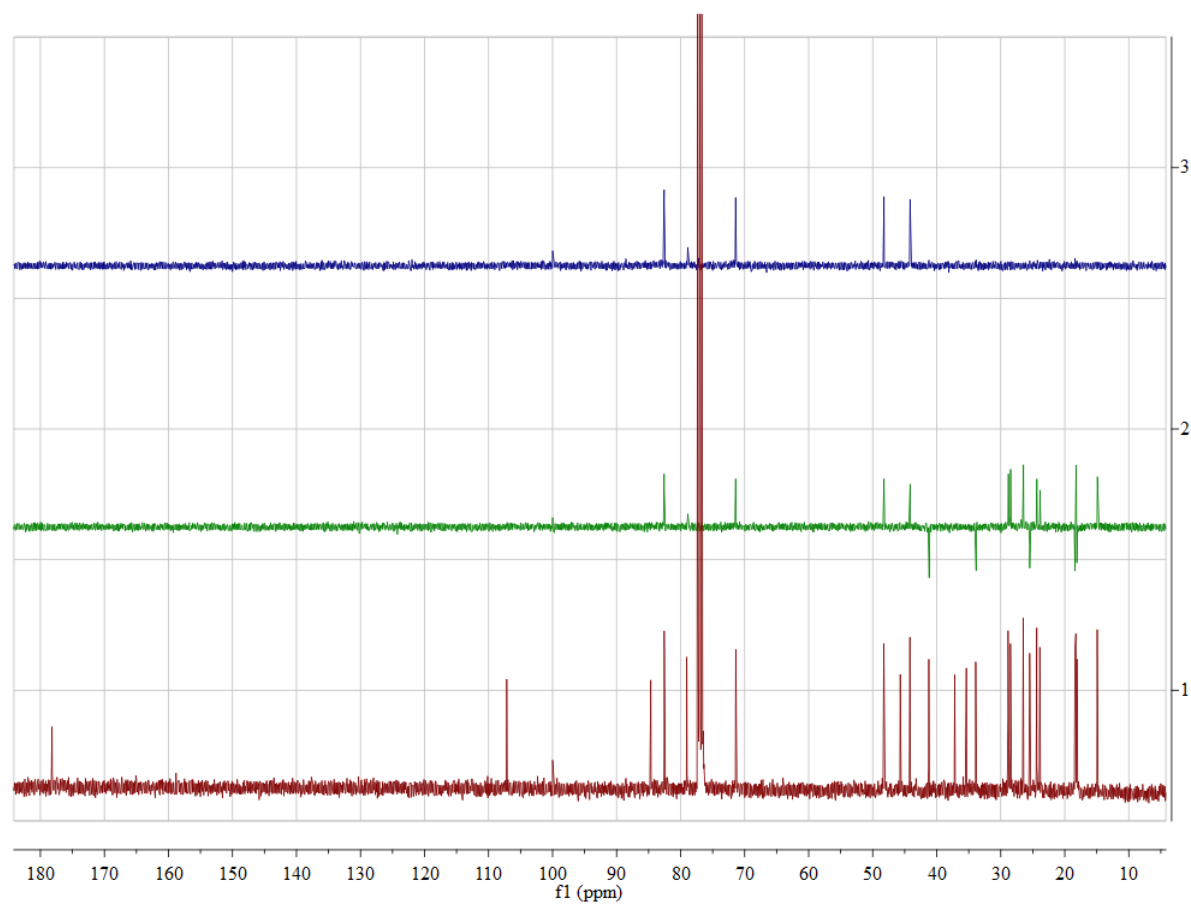



S69  $^1\text{H}$ - $^1\text{H}$  COSY Spectrum of **2a** in  $\text{CDCl}_3$

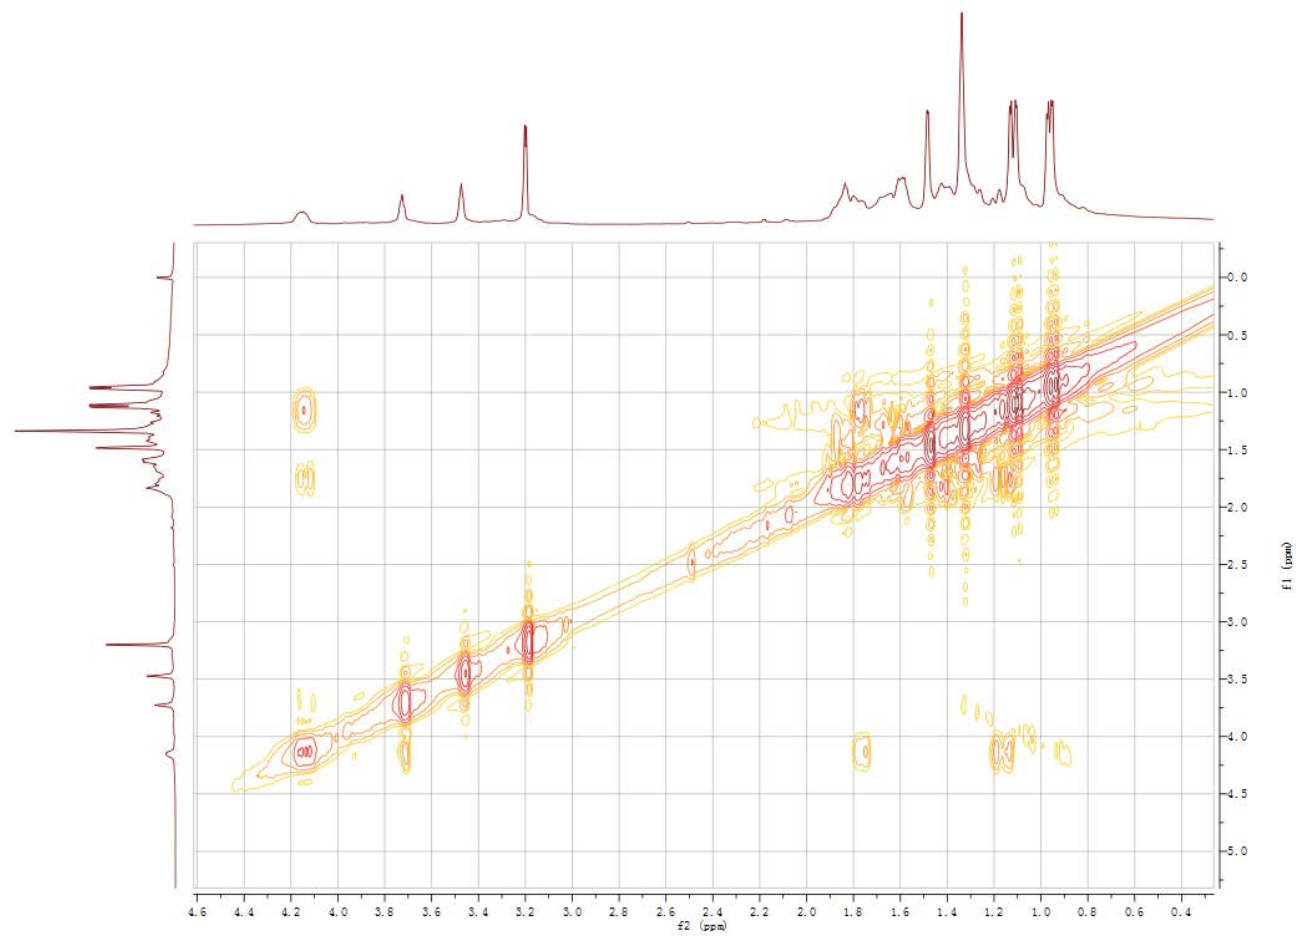

S70 HSQC Spectrum of **2a** in CDCl<sub>3</sub>

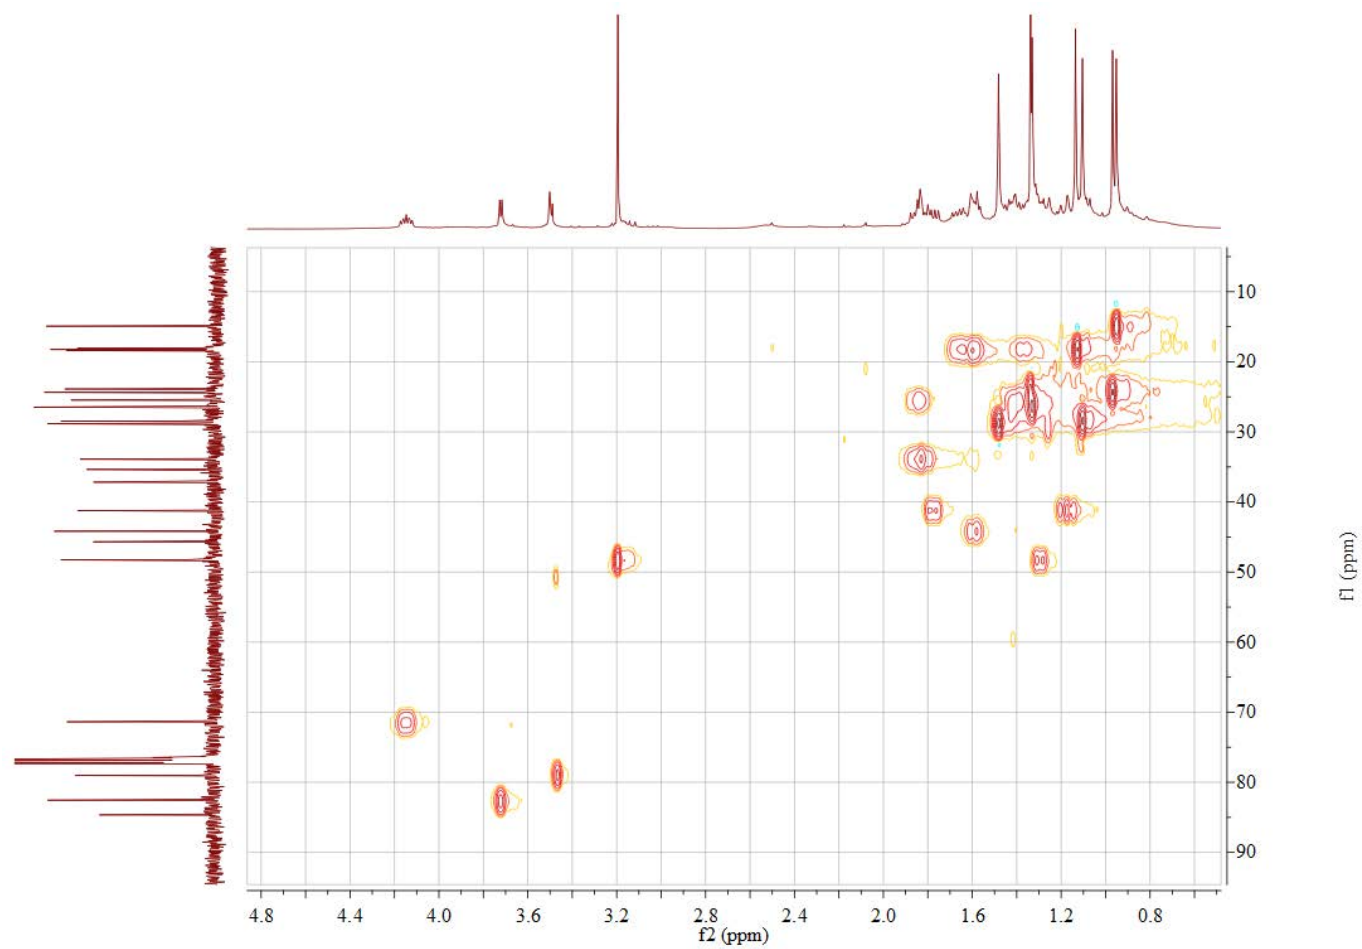

S71 HMBC Spectrum of **2a** in CDCl<sub>3</sub>

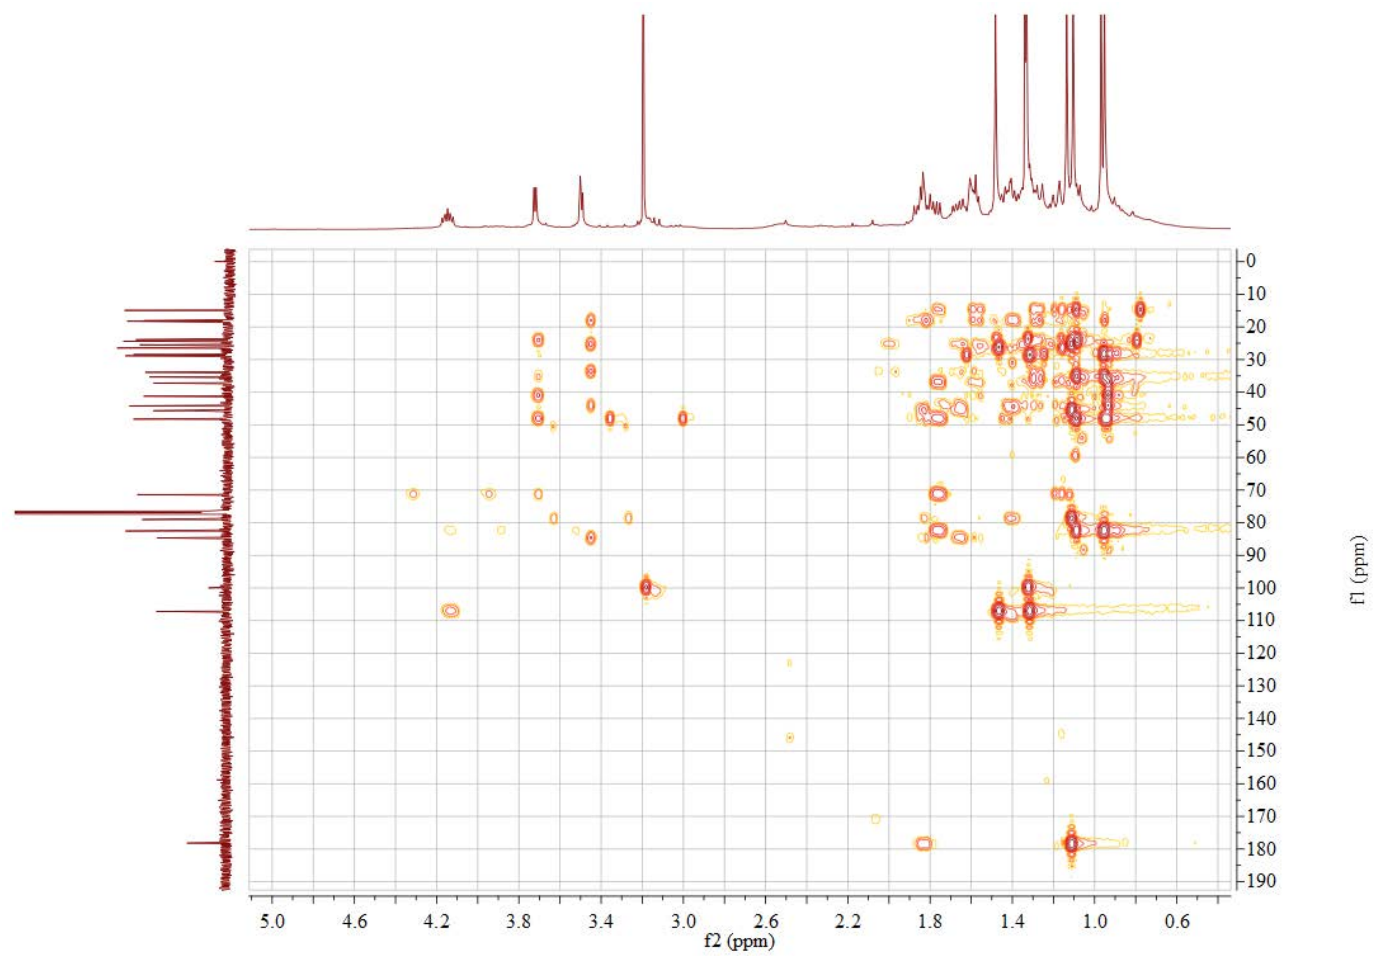

S72 NOESY Spectrum of **2a** in CDCl<sub>3</sub>

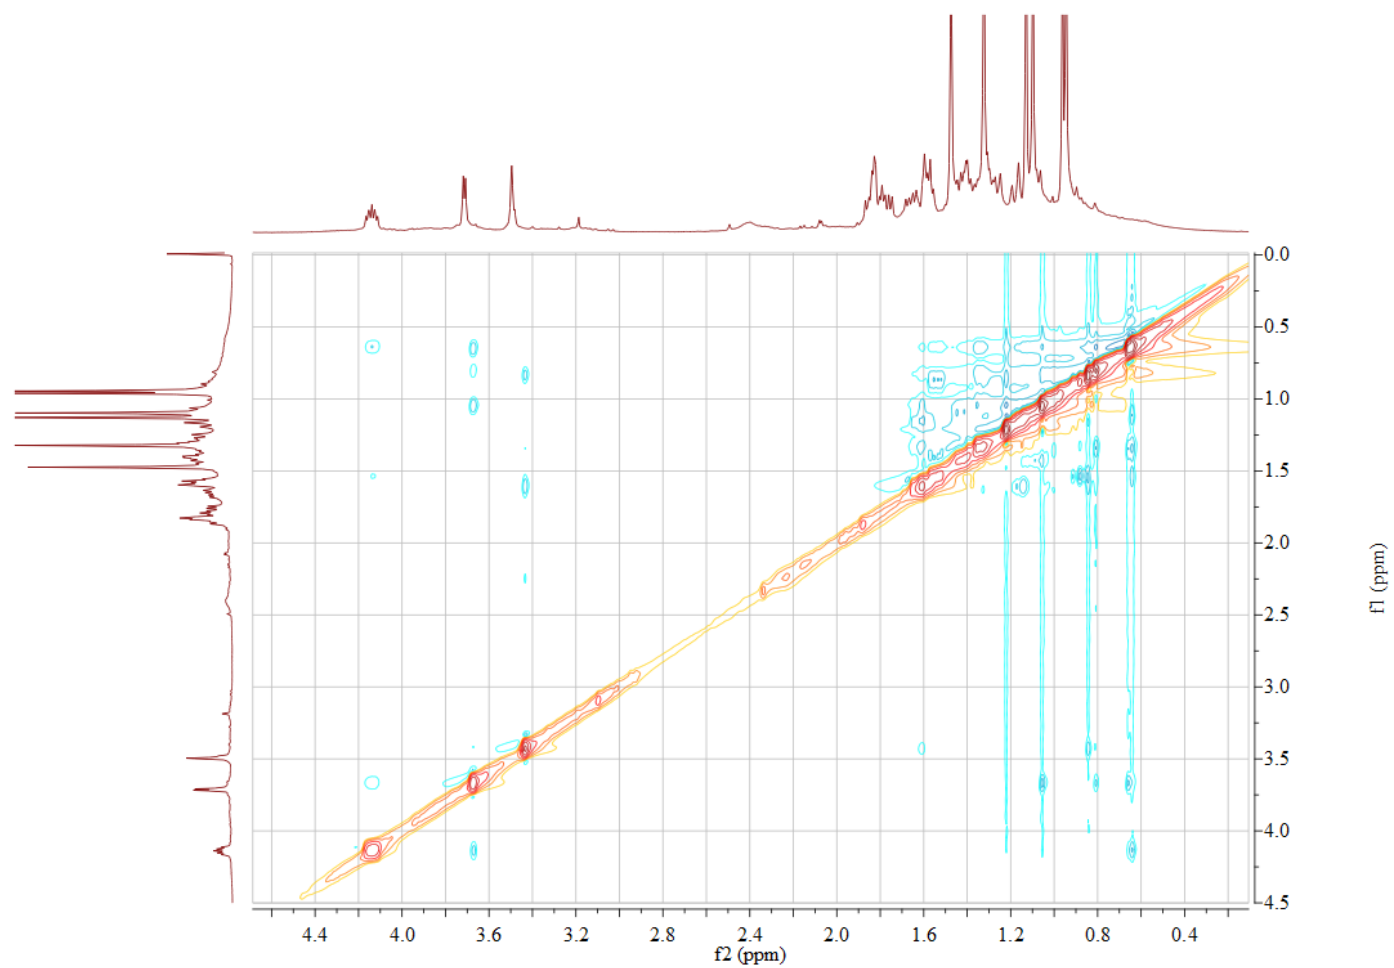

S73  $^1\text{H}$  NMR Spectrum of **2b** in  $\text{CDCl}_3$

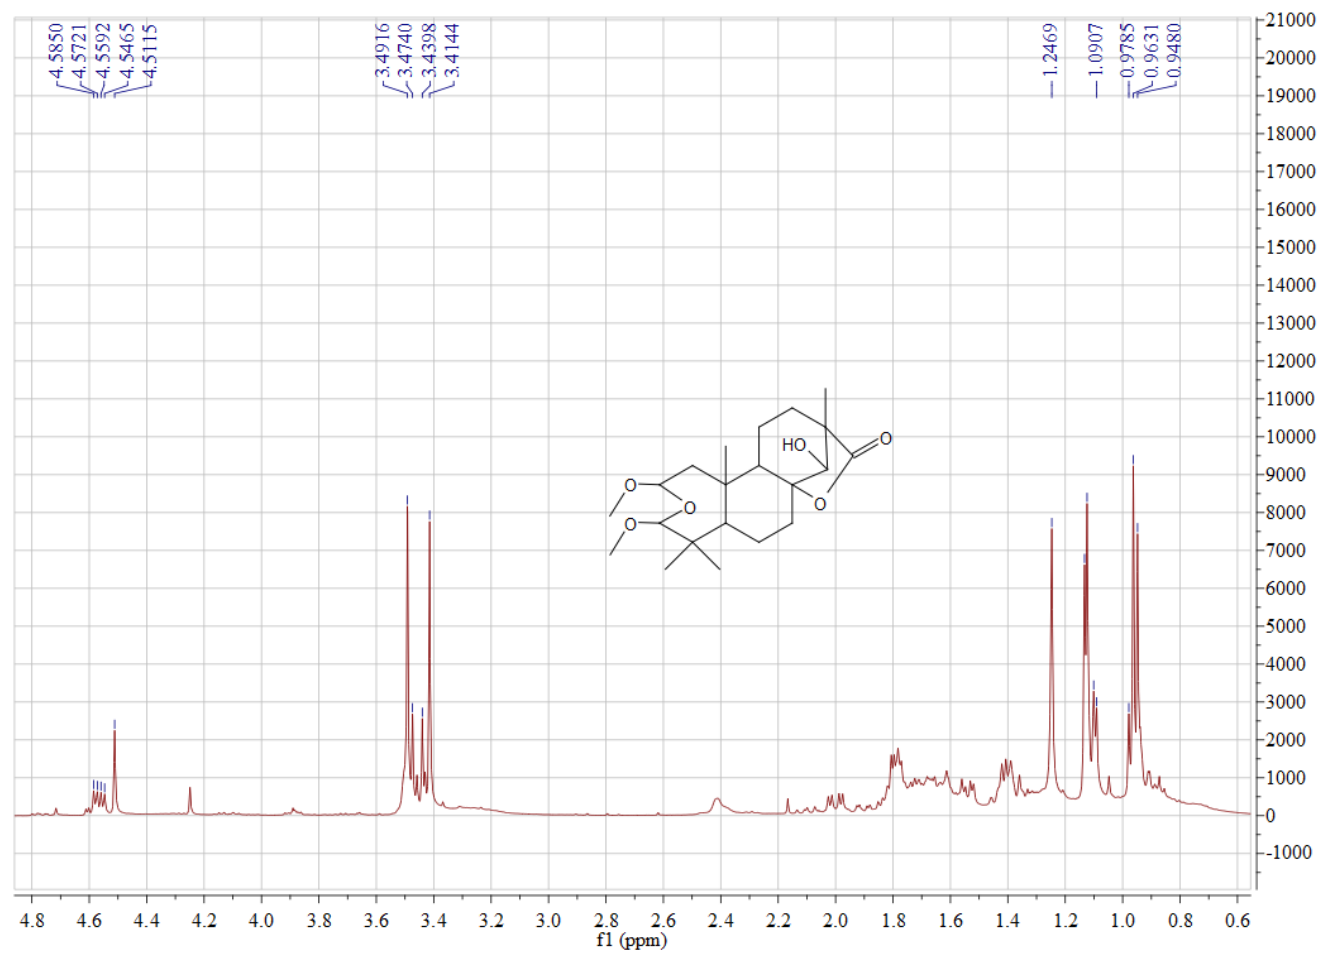

**S74**  $^{13}\text{C}$  NMR Spectrum of **2b** in  $\text{CDCl}_3$

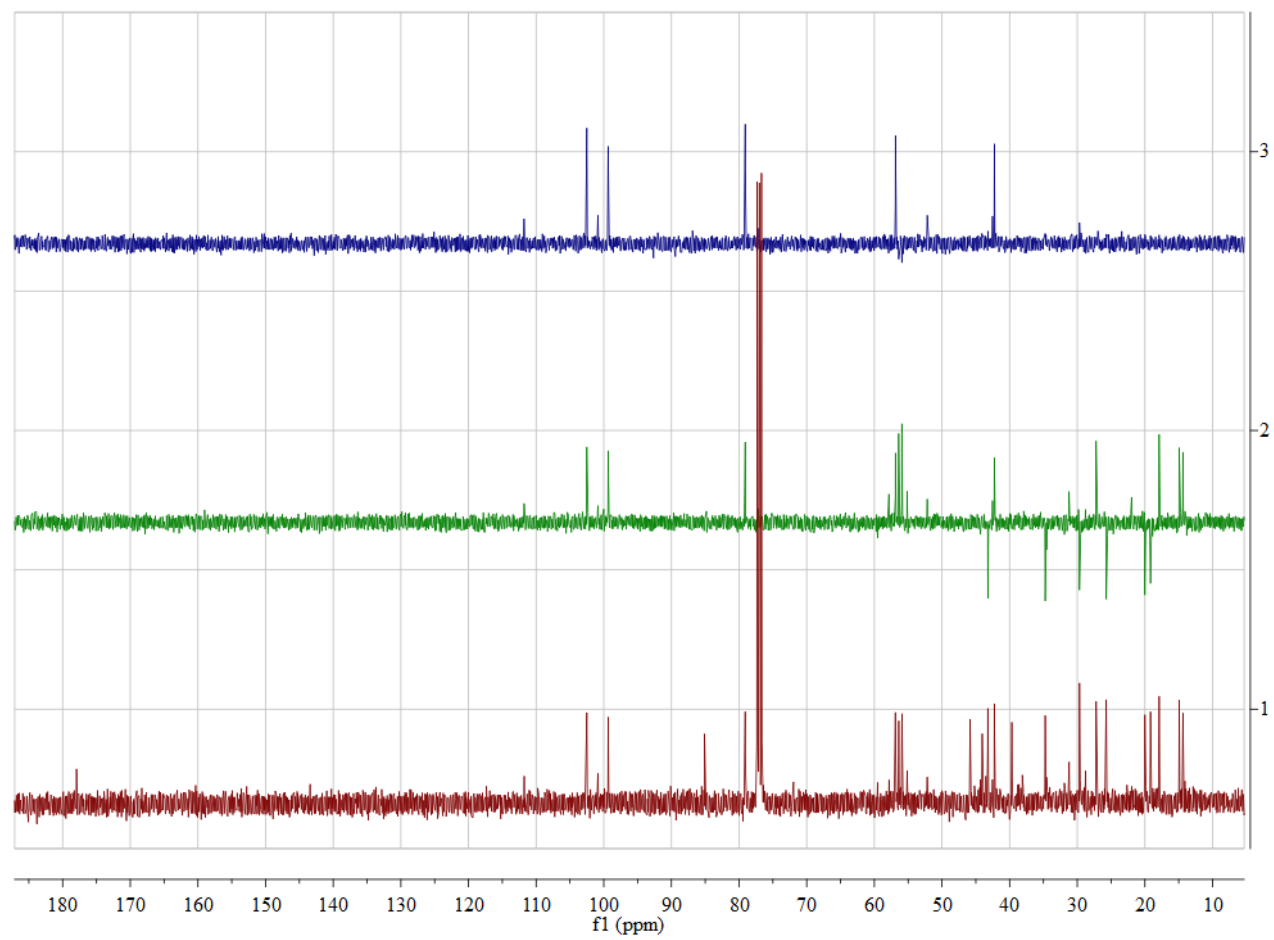

S75 HSQC Spectrum of **2b** in CDCl<sub>3</sub>

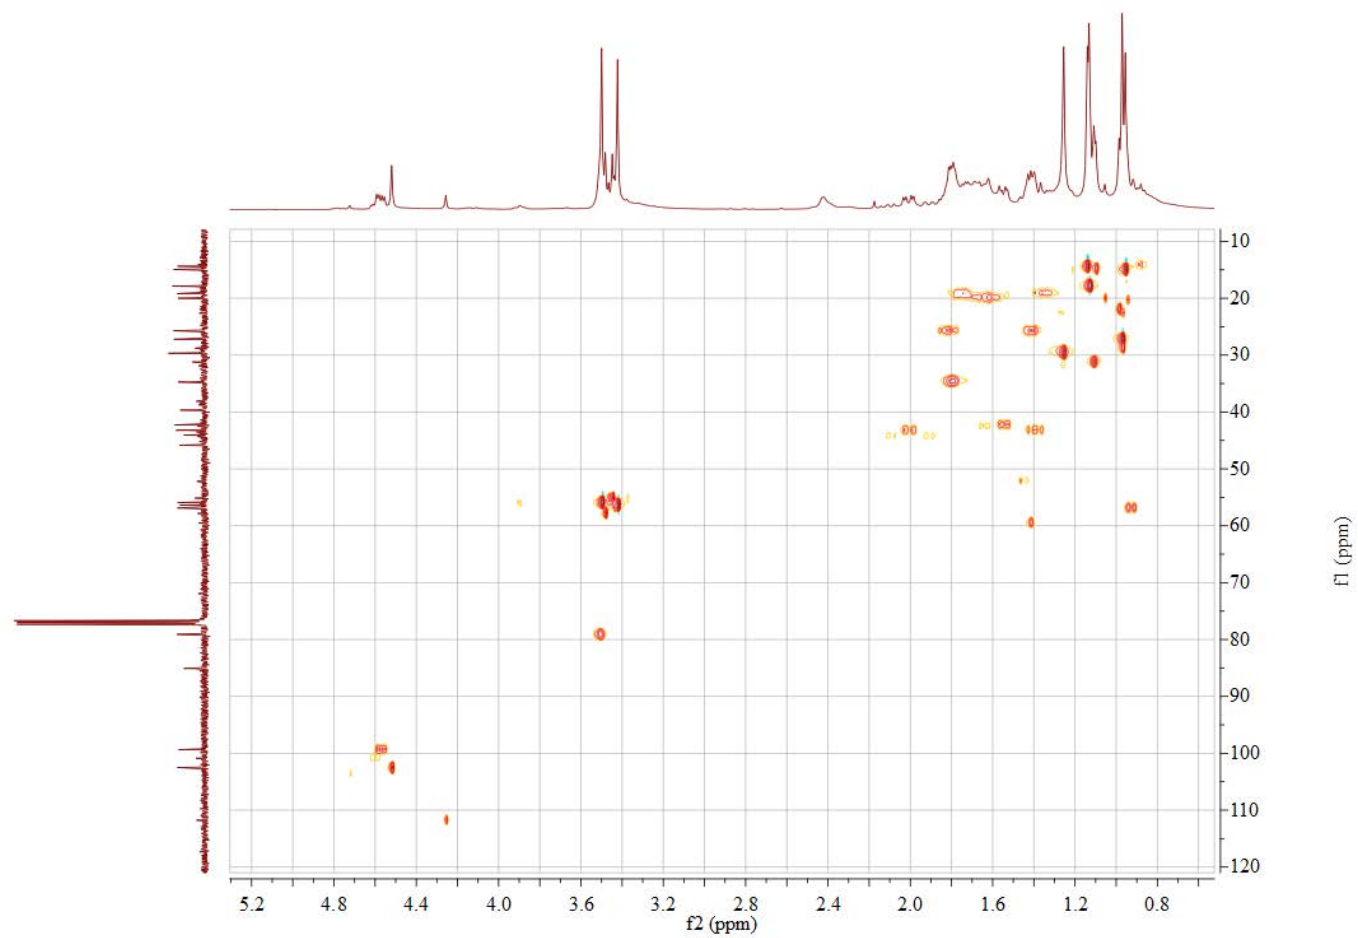

S76 HMBC Spectrum of **2b** in CDCl<sub>3</sub>

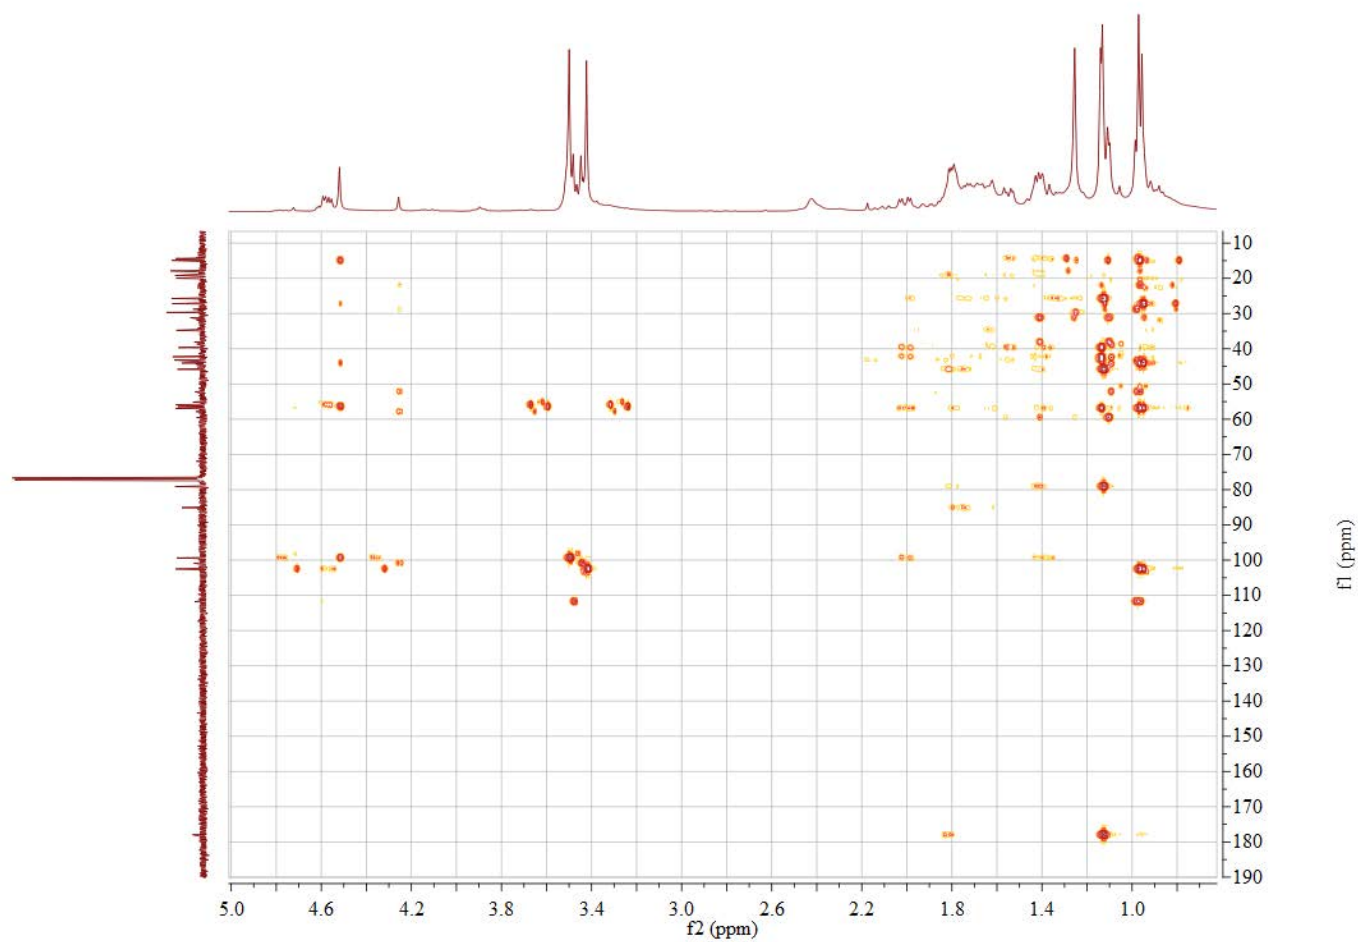



**S77**  $^1\text{H}$  NMR Spectrum of **1a** in  $\text{CDCl}_3$

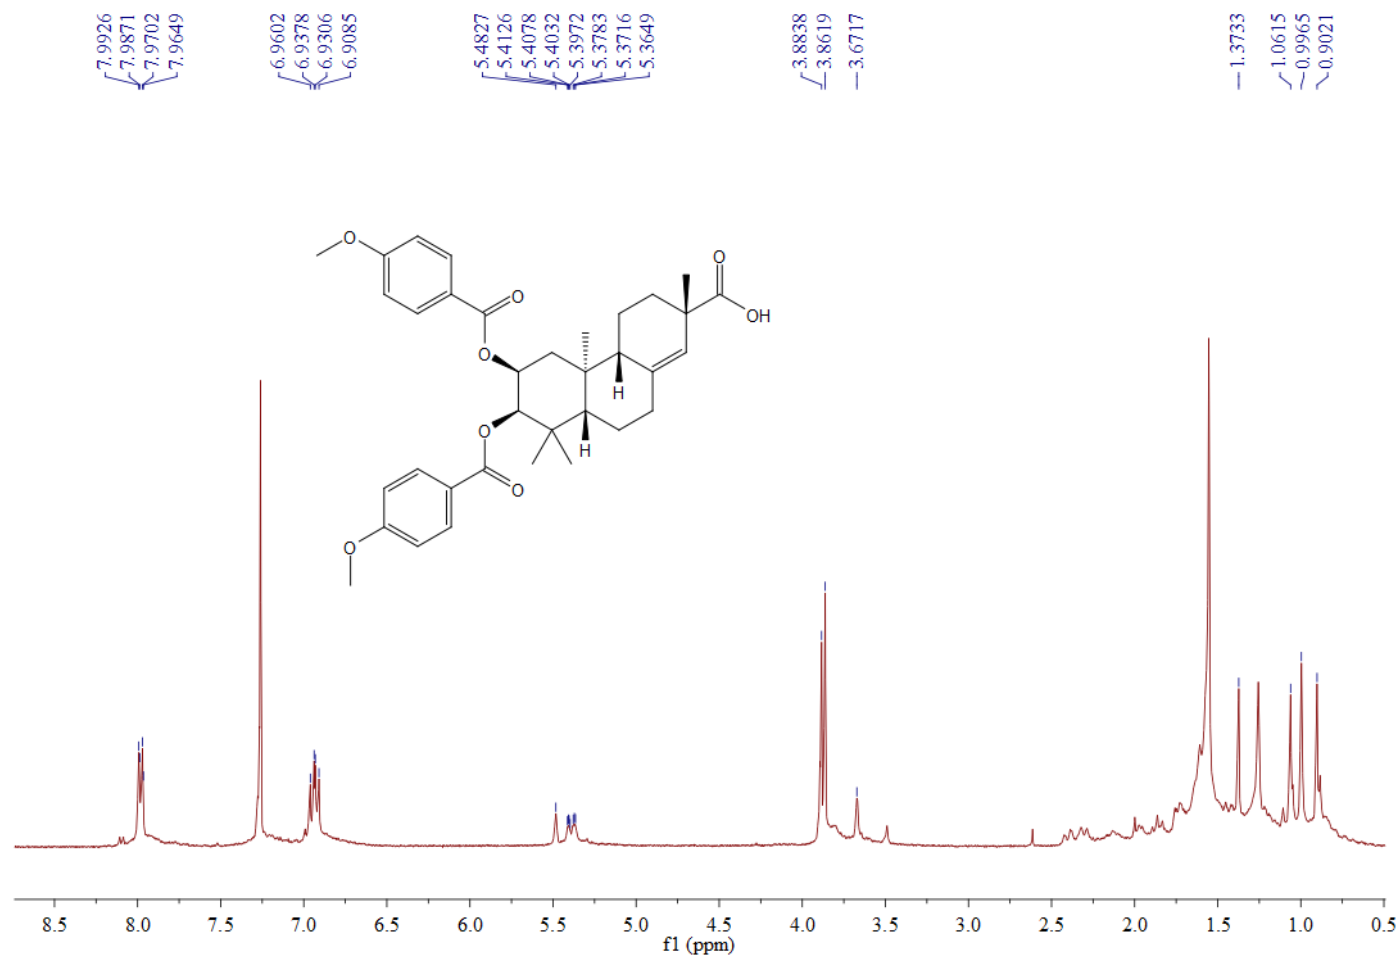

**S78**  $^{13}\text{C}$  NMR Spectrum of **1a** in  $\text{CDCl}_3$

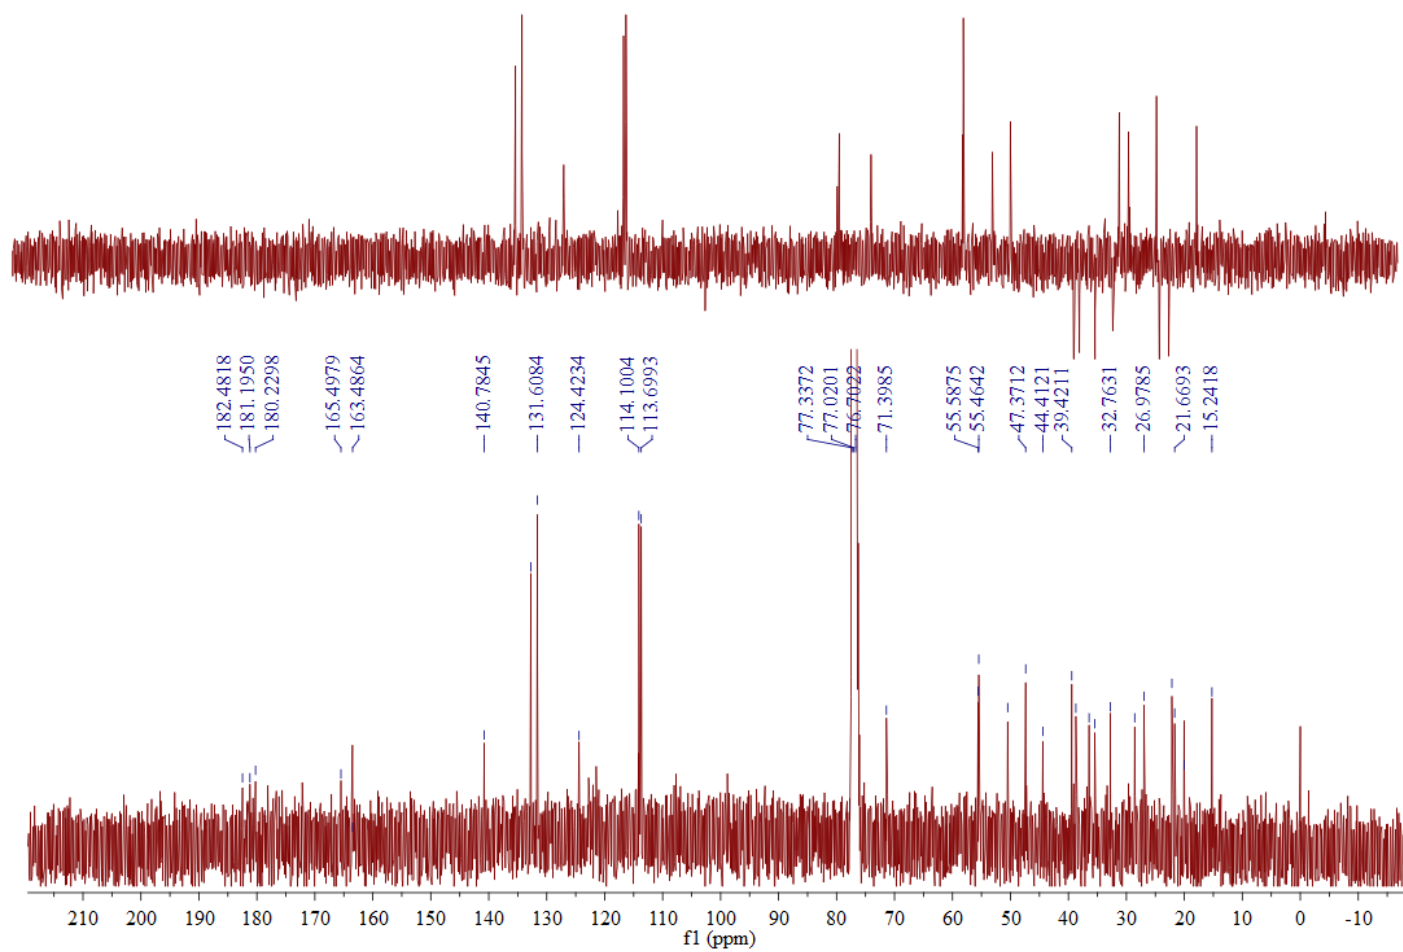

S79 Selected  $^1\text{H}$ - $^1\text{H}$  COSY, HMBC, and NOESY correlations of **2-6**. ( —  $^1\text{H}$  -  $^1\text{H}$  COSY,  $\curvearrowright$  HMBC,  $\curvearrowright$  NOESY )

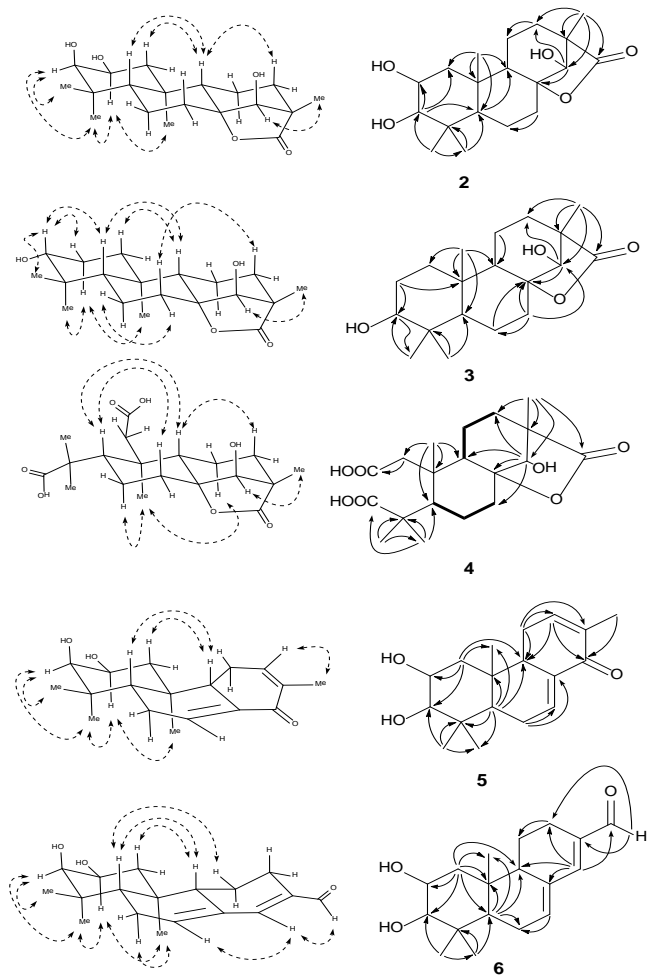

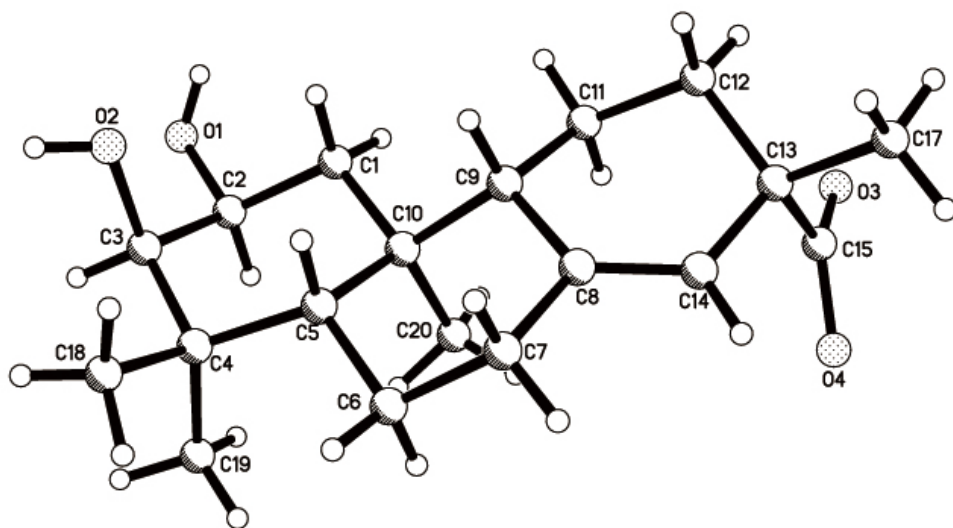

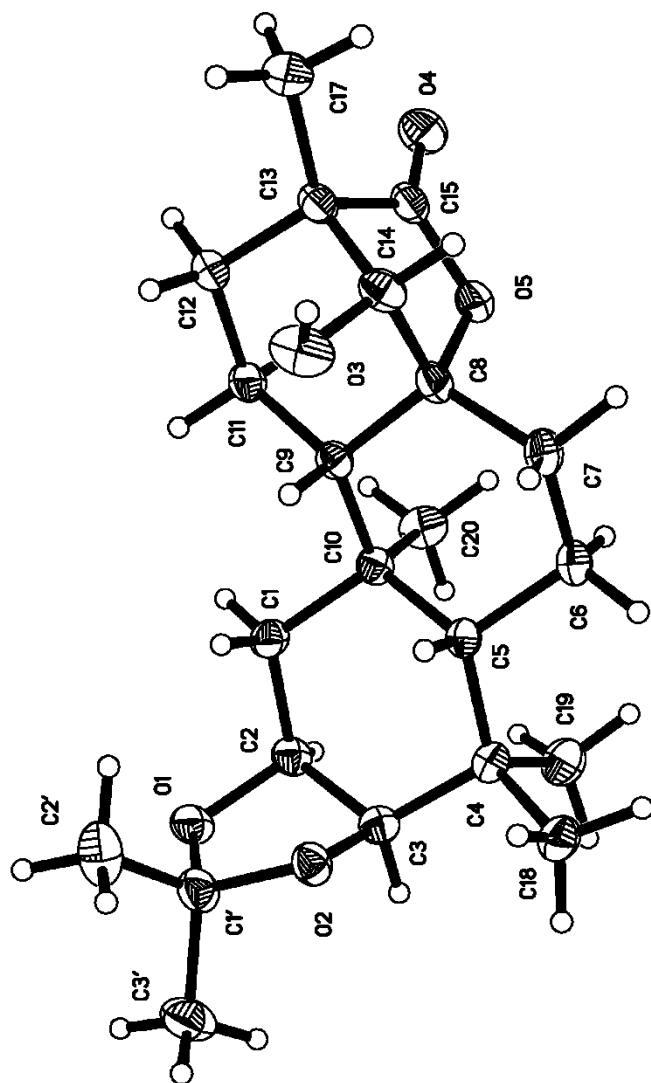

**S82** The transformation of **2** to **2a**.

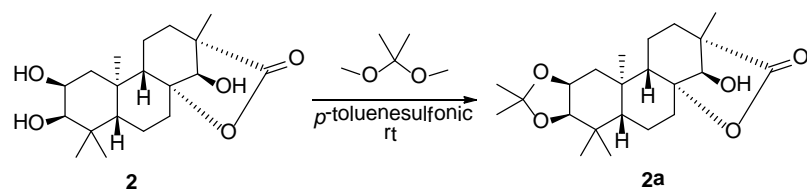

**S83** CD curves of **1**, **7–10** and **12**.

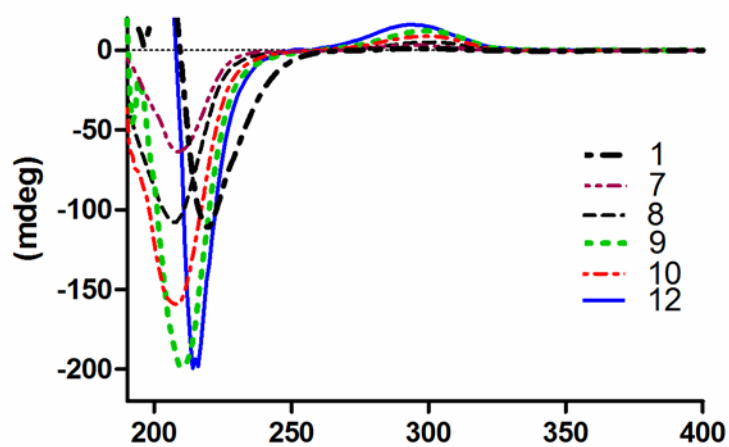

**S84** CD curves of **2–4** and **11**.

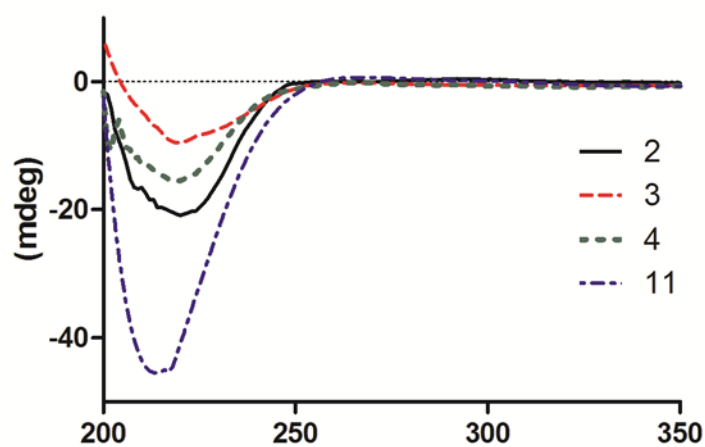

**S85** X-ray crystallographic data for **1**.

|                                       |                                                                                                                |
|---------------------------------------|----------------------------------------------------------------------------------------------------------------|
| Chemical formula                      | C <sub>38</sub> H <sub>58</sub> O <sub>9</sub>                                                                 |
| Formula Mass                          | 658.84                                                                                                         |
| Crystal system                        | a = 22.0224 (3) Å alpha = 90 deg.<br>b = 10.2959(1) Å beta = 98.260(1) deg.<br>c = 7.9117(1) Å gamma = 90 deg. |
| Unit cell volume                      | 1775.29 (4) Å <sup>3</sup>                                                                                     |
| Temperature                           | 153 (2) K                                                                                                      |
| Space group                           | C1–2–1                                                                                                         |
| No. of formula units per unit cell, Z | 2                                                                                                              |
| No. of reflections measured           | 21727                                                                                                          |
| No. of independent reflections        | 3449                                                                                                           |
| Final $R_1$ values                    | 0.0398                                                                                                         |
| Final $R_1$ values (all data)         | 0.0425                                                                                                         |
| Final $wR(F^2)$ values (all data)     | 0.1072                                                                                                         |
| Absorption coefficient                | 0.697                                                                                                          |
| Radiation type                        | Cu K $\alpha$                                                                                                  |
| Goodness of fit on $F^2$              | 1.056                                                                                                          |
| Flack parameter                       | –0.1(2)                                                                                                        |
| CCDC number                           | 951382                                                                                                         |

Colorless crystals of **1** were obtained in CHCl<sub>3</sub> : MeOH (20:1). Crystal data were obtained on a Xcalibur, Onyx, Nova detector employing graphite monochromated Copper-K $\alpha$  radiation ( $\lambda$ =1.54178 Å) at 150(2) K and operating in the  $\phi/\omega$  scan mode. The crystal structure was solved by direct method using the program OLEX2 (O. V. Dolomanov, L. J. Bourhis, R. J. Gildea, J. A. K. Howard and H. Puschmann, OLEX2: a complete structure solution, refinement and analysis program. J. Appl. Cryst. (2009). 42, 339-341.) and subsequent Fourier difference techniques, and refined anisotropically by full-matrix least-squares on  $F^2$  using OLEX2 (O. V. Dolomanov, L. J. Bourhis, R. J. Gildea, J. A. K. Howard and H. Puschmann, OLEX2: a complete structure solution, refinement and analysis program. J. Appl. Cryst. (2009). 42, 339-341.). All non-hydrogen atoms were refined anisotropically. The hydrogen atom positions were geometrically idealized and

allowed to ride on their parent atoms. Crystallographic data for 1 have been deposited at the Cambridge Crystallographic Data Centre (deposition No. CCDC-951382). Copies of these data can be obtained free of charge via [www.ccdc.cam.ac.uk/conts/retrieving.html](http://www.ccdc.cam.ac.uk/conts/retrieving.html) or from the Cambridge Crystallographic Data Centre, 12, Union Road, Cambridge CB21EZ, UK. [fax: (+44) 1223-336-033; or email: [deposit@ccdc.cam.ac.uk](mailto:deposit@ccdc.cam.ac.uk)].



**S86** X-ray crystallographic data for **2a**.

|                                                             |                                                                                                                  |
|-------------------------------------------------------------|------------------------------------------------------------------------------------------------------------------|
| Chemical formula                                            | C <sub>22</sub> H <sub>34</sub> O <sub>5</sub>                                                                   |
| Formula Mass                                                | 378.49                                                                                                           |
| Crystal system                                              | a = 11.9418(3) Å alpha = 90.00 deg.<br>b = 12.1022(3) Å beta = 90.00 deg.<br>c = 14.2821(3) Å gamma = 90.00 deg. |
| Unit cell volume                                            | 2064.08(8) Å <sup>3</sup>                                                                                        |
| Temperature                                                 | 150 (2) K                                                                                                        |
| Space group                                                 | <i>P</i> 21–21–21                                                                                                |
| No. of formula units per unit cell, <i>Z</i>                | 4                                                                                                                |
| No. of reflections measured                                 | 17564                                                                                                            |
| No. of independent reflections                              | 3671                                                                                                             |
| <i>R</i> <sub>int</sub>                                     | 0.0312                                                                                                           |
| Final <i>R</i> <sub>1</sub> values                          | 0.0324                                                                                                           |
| Final <i>R</i> <sub>1</sub> values (all data)               | 0.0340                                                                                                           |
| Final <i>wR</i> ( <i>F</i> <sup>2</sup> ) values (all data) | 0.0808                                                                                                           |
| Absorption coefficient                                      | 0.682                                                                                                            |
| Radiation type                                              | Cu Kα                                                                                                            |
| Goodness of fit on <i>F</i> <sup>2</sup>                    | 1.105                                                                                                            |
| Flack parameter                                             | –0.11(14)                                                                                                        |
| CCDC number                                                 | 951383                                                                                                           |

Colorless crystals of **2a** were obtained in CHCl<sub>3</sub> : MeOH (20:1). Crystal data were obtained on a Bruker APEX CCD detector employing graphite monochromated Copper-Kα radiation (λ=1.54178 Å) at 150(2) K and operating in the φ/ω scan mode. The crystal structure was solved by direct method using the program SHELXS-97 (G. M. Sheldrick, *SHELXS-97: Program for X-ray Crystal Structure Solution*, University of Gottingen, Germany, 1997) and subsequent Fourier difference techniques, and refined anisotropically by full-matrix least-squares on *F*<sup>2</sup> using SHELXL-97 (G. M. Sheldrick, *SHELX-97: Program for X-ray Crystal Structure Refinement*, University of Gottingen, Germany, 1997). All

non-hydrogen atoms were refined anisotropically. The hydrogen atom positions were geometrically idealized and allowed to ride on their parent atoms. Crystallographic data for **2a** have been deposited at the Cambridge Crystallographic Data Centre (deposition No. CCDC-951383). Copies of these data can be obtained free of charge *via* [www.ccdc.cam.ac.uk/conts/retrieving.html](http://www.ccdc.cam.ac.uk/conts/retrieving.html) or from the Cambridge Crystallographic Data Centre, 12, Union Road, Cambridge CB21EZ, UK. [fax: (+44) 1223-336-033; or email: [deposit@ccdc.cam.ac.uk](mailto:deposit@ccdc.cam.ac.uk)].
